# Supplementary material for: Gene Flow and Diversification in Himalopsyche Martynovi Species Complex (Trichoptera: Rhyacophilidae) In the Hengduan Mountains
Source: Preprints.org preprint supplement (doi:10.20944/preprints202107.0468.v1), 2021-07-20
Supplement: Supplementary file 1 [file supplementary]

## Sheet: Sheet1
ind1	ind2	ind3	ind4	BAAAA	ABAAA	AABAA	AAABA	introgression	DFO_stat	DFO_Pvalue	DIL_stat	DIL_Pvalue	DFI_stat	DFI_Pvalue	DOL_stat	DOL_Pvalue
I19057_3_seq1	I19057_3_seq2	I19058_4_seq1	I19060_6_seq1	BAAAA	ABAAA	AABAA	AAABA	introgression	DFO_stat	DFO_Pvalue	DIL_stat	DIL_Pvalue	DFI_stat	DFI_Pvalue	DOL_stat	DOL_Pvalue
I19057_3_seq1	I19057_3_seq2	I19058_4_seq1	I19060_6_seq2	BAAAA	ABAAA	AABAA	AAABA	introgression	DFO_stat	DFO_Pvalue	DIL_stat	DIL_Pvalue	DFI_stat	DFI_Pvalue	DOL_stat	DOL_Pvalue
I19057_3_seq1	I19057_3_seq2	I19058_4_seq1	I19061_7_seq1	BAAAA	ABAAA	AABAA	AAABA	introgression	DFO_stat	DFO_Pvalue	DIL_stat	DIL_Pvalue	DFI_stat	DFI_Pvalue	DOL_stat	DOL_Pvalue
I19057_3_seq1	I19057_3_seq2	I19058_4_seq1	I19061_7_seq2	BAAAA	ABAAA	AABAA	AAABA	introgression	DFO_stat	DFO_Pvalue	DIL_stat	DIL_Pvalue	DFI_stat	DFI_Pvalue	DOL_stat	DOL_Pvalue
I19057_3_seq1	I19057_3_seq2	I19058_4_seq1	I19062_8_seq1	BAAAA	ABAAA	AABAA	AAABA	introgression	DFO_stat	DFO_Pvalue	DIL_stat	DIL_Pvalue	DFI_stat	DFI_Pvalue	DOL_stat	DOL_Pvalue
I19057_3_seq1	I19057_3_seq2	I19058_4_seq1	I19062_8_seq2	BAAAA	ABAAA	AABAA	AAABA	introgression	DFO_stat	DFO_Pvalue	DIL_stat	DIL_Pvalue	DFI_stat	DFI_Pvalue	DOL_stat	DOL_Pvalue
I19057_3_seq1	I19057_3_seq2	I19058_4_seq1	I19064_11_seq1	BAAAA	ABAAA	AABAA	AAABA	introgression	DFO_stat	DFO_Pvalue	DIL_stat	DIL_Pvalue	DFI_stat	DFI_Pvalue	DOL_stat	DOL_Pvalue
I19057_3_seq1	I19057_3_seq2	I19058_4_seq1	I19064_11_seq2	BAAAA	ABAAA	AABAA	AAABA	introgression	DFO_stat	DFO_Pvalue	DIL_stat	DIL_Pvalue	DFI_stat	DFI_Pvalue	DOL_stat	DOL_Pvalue
I19057_3_seq1	I19057_3_seq2	I19058_4_seq1	I19065_12_seq1	BAAAA	ABAAA	AABAA	AAABA	introgression	DFO_stat	DFO_Pvalue	DIL_stat	DIL_Pvalue	DFI_stat	DFI_Pvalue	DOL_stat	DOL_Pvalue
I19057_3_seq1	I19057_3_seq2	I19058_4_seq1	I19065_12_seq2	BAAAA	ABAAA	AABAA	AAABA	introgression	DFO_stat	DFO_Pvalue	DIL_stat	DIL_Pvalue	DFI_stat	DFI_Pvalue	DOL_stat	DOL_Pvalue
I19057_3_seq1	I19057_3_seq2	I19058_4_seq1	I19066_13_seq1	BAAAA	ABAAA	AABAA	AAABA	introgression	DFO_stat	DFO_Pvalue	DIL_stat	DIL_Pvalue	DFI_stat	DFI_Pvalue	DOL_stat	DOL_Pvalue
I19057_3_seq1	I19057_3_seq2	I19058_4_seq1	I19066_13_seq2	BAAAA	ABAAA	AABAA	AAABA	introgression	DFO_stat	DFO_Pvalue	DIL_stat	DIL_Pvalue	DFI_stat	DFI_Pvalue	DOL_stat	DOL_Pvalue
I19057_3_seq1	I19057_3_seq2	I19058_4_seq1	I19067_14_seq1	BAAAA	ABAAA	AABAA	AAABA	introgression	DFO_stat	DFO_Pvalue	DIL_stat	DIL_Pvalue	DFI_stat	DFI_Pvalue	DOL_stat	DOL_Pvalue
I19057_3_seq1	I19057_3_seq2	I19058_4_seq1	I19067_14_seq2	BAAAA	ABAAA	AABAA	AAABA	introgression	DFO_stat	DFO_Pvalue	DIL_stat	DIL_Pvalue	DFI_stat	DFI_Pvalue	DOL_stat	DOL_Pvalue
I19057_3_seq1	I19057_3_seq2	I19058_4_seq1	I19068_16_seq1	BAAAA	ABAAA	AABAA	AAABA	introgression	DFO_stat	DFO_Pvalue	DIL_stat	DIL_Pvalue	DFI_stat	DFI_Pvalue	DOL_stat	DOL_Pvalue
I19057_3_seq1	I19057_3_seq2	I19058_4_seq1	I19068_16_seq2	BAAAA	ABAAA	AABAA	AAABA	introgression	DFO_stat	DFO_Pvalue	DIL_stat	DIL_Pvalue	DFI_stat	DFI_Pvalue	DOL_stat	DOL_Pvalue
I19057_3_seq1	I19057_3_seq2	I19058_4_seq2	I19060_6_seq1	BAAAA	ABAAA	AABAA	AAABA	introgression	DFO_stat	DFO_Pvalue	DIL_stat	DIL_Pvalue	DFI_stat	DFI_Pvalue	DOL_stat	DOL_Pvalue
I19057_3_seq1	I19057_3_seq2	I19058_4_seq2	I19060_6_seq2	BAAAA	ABAAA	AABAA	AAABA	introgression	DFO_stat	DFO_Pvalue	DIL_stat	DIL_Pvalue	DFI_stat	DFI_Pvalue	DOL_stat	DOL_Pvalue
I19057_3_seq1	I19057_3_seq2	I19058_4_seq2	I19061_7_seq1	BAAAA	ABAAA	AABAA	AAABA	introgression	DFO_stat	DFO_Pvalue	DIL_stat	DIL_Pvalue	DFI_stat	DFI_Pvalue	DOL_stat	DOL_Pvalue
I19057_3_seq1	I19057_3_seq2	I19058_4_seq2	I19061_7_seq2	BAAAA	ABAAA	AABAA	AAABA	introgression	DFO_stat	DFO_Pvalue	DIL_stat	DIL_Pvalue	DFI_stat	DFI_Pvalue	DOL_stat	DOL_Pvalue
I19057_3_seq1	I19057_3_seq2	I19058_4_seq2	I19062_8_seq1	BAAAA	ABAAA	AABAA	AAABA	introgression	DFO_stat	DFO_Pvalue	DIL_stat	DIL_Pvalue	DFI_stat	DFI_Pvalue	DOL_stat	DOL_Pvalue
I19057_3_seq1	I19057_3_seq2	I19058_4_seq2	I19062_8_seq2	BAAAA	ABAAA	AABAA	AAABA	introgression	DFO_stat	DFO_Pvalue	DIL_stat	DIL_Pvalue	DFI_stat	DFI_Pvalue	DOL_stat	DOL_Pvalue
I19057_3_seq1	I19057_3_seq2	I19058_4_seq2	I19064_11_seq1	BAAAA	ABAAA	AABAA	AAABA	introgression	DFO_stat	DFO_Pvalue	DIL_stat	DIL_Pvalue	DFI_stat	DFI_Pvalue	DOL_stat	DOL_Pvalue
I19057_3_seq1	I19057_3_seq2	I19058_4_seq2	I19064_11_seq2	BAAAA	ABAAA	AABAA	AAABA	introgression	DFO_stat	DFO_Pvalue	DIL_stat	DIL_Pvalue	DFI_stat	DFI_Pvalue	DOL_stat	DOL_Pvalue
I19057_3_seq1	I19057_3_seq2	I19058_4_seq2	I19065_12_seq1	BAAAA	ABAAA	AABAA	AAABA	introgression	DFO_stat	DFO_Pvalue	DIL_stat	DIL_Pvalue	DFI_stat	DFI_Pvalue	DOL_stat	DOL_Pvalue
I19057_3_seq1	I19057_3_seq2	I19058_4_seq2	I19065_12_seq2	BAAAA	ABAAA	AABAA	AAABA	introgression	DFO_stat	DFO_Pvalue	DIL_stat	DIL_Pvalue	DFI_stat	DFI_Pvalue	DOL_stat	DOL_Pvalue
I19057_3_seq1	I19057_3_seq2	I19058_4_seq2	I19066_13_seq1	BAAAA	ABAAA	AABAA	AAABA	introgression	DFO_stat	DFO_Pvalue	DIL_stat	DIL_Pvalue	DFI_stat	DFI_Pvalue	DOL_stat	DOL_Pvalue
I19057_3_seq1	I19057_3_seq2	I19058_4_seq2	I19066_13_seq2	BAAAA	ABAAA	AABAA	AAABA	introgression	DFO_stat	DFO_Pvalue	DIL_stat	DIL_Pvalue	DFI_stat	DFI_Pvalue	DOL_stat	DOL_Pvalue
I19057_3_seq1	I19057_3_seq2	I19058_4_seq2	I19067_14_seq1	BAAAA	ABAAA	AABAA	AAABA	introgression	DFO_stat	DFO_Pvalue	DIL_stat	DIL_Pvalue	DFI_stat	DFI_Pvalue	DOL_stat	DOL_Pvalue
I19057_3_seq1	I19057_3_seq2	I19058_4_seq2	I19067_14_seq2	BAAAA	ABAAA	AABAA	AAABA	introgression	DFO_stat	DFO_Pvalue	DIL_stat	DIL_Pvalue	DFI_stat	DFI_Pvalue	DOL_stat	DOL_Pvalue
I19057_3_seq1	I19057_3_seq2	I19058_4_seq2	I19068_16_seq1	BAAAA	ABAAA	AABAA	AAABA	introgression	DFO_stat	DFO_Pvalue	DIL_stat	DIL_Pvalue	DFI_stat	DFI_Pvalue	DOL_stat	DOL_Pvalue
I19057_3_seq1	I19057_3_seq2	I19058_4_seq2	I19068_16_seq2	BAAAA	ABAAA	AABAA	AAABA	introgression	DFO_stat	DFO_Pvalue	DIL_stat	DIL_Pvalue	DFI_stat	DFI_Pvalue	DOL_stat	DOL_Pvalue
I19057_3_seq1	I19057_3_seq2	I19059_5_seq1	I19060_6_seq1	BAAAA	ABAAA	AABAA	AAABA	introgression	DFO_stat	DFO_Pvalue	DIL_stat	DIL_Pvalue	DFI_stat	DFI_Pvalue	DOL_stat	DOL_Pvalue
I19057_3_seq1	I19057_3_seq2	I19059_5_seq1	I19060_6_seq2	BAAAA	ABAAA	AABAA	AAABA	introgression	DFO_stat	DFO_Pvalue	DIL_stat	DIL_Pvalue	DFI_stat	DFI_Pvalue	DOL_stat	DOL_Pvalue
I19057_3_seq1	I19057_3_seq2	I19059_5_seq1	I19061_7_seq1	BAAAA	ABAAA	AABAA	AAABA	introgression	DFO_stat	DFO_Pvalue	DIL_stat	DIL_Pvalue	DFI_stat	DFI_Pvalue	DOL_stat	DOL_Pvalue
I19057_3_seq1	I19057_3_seq2	I19059_5_seq1	I19061_7_seq2	BAAAA	ABAAA	AABAA	AAABA	introgression	DFO_stat	DFO_Pvalue	DIL_stat	DIL_Pvalue	DFI_stat	DFI_Pvalue	DOL_stat	DOL_Pvalue
I19057_3_seq1	I19057_3_seq2	I19059_5_seq1	I19062_8_seq1	BAAAA	ABAAA	AABAA	AAABA	introgression	DFO_stat	DFO_Pvalue	DIL_stat	DIL_Pvalue	DFI_stat	DFI_Pvalue	DOL_stat	DOL_Pvalue
I19057_3_seq1	I19057_3_seq2	I19059_5_seq1	I19062_8_seq2	BAAAA	ABAAA	AABAA	AAABA	introgression	DFO_stat	DFO_Pvalue	DIL_stat	DIL_Pvalue	DFI_stat	DFI_Pvalue	DOL_stat	DOL_Pvalue
I19057_3_seq1	I19057_3_seq2	I19059_5_seq1	I19064_11_seq1	BAAAA	ABAAA	AABAA	AAABA	introgression	DFO_stat	DFO_Pvalue	DIL_stat	DIL_Pvalue	DFI_stat	DFI_Pvalue	DOL_stat	DOL_Pvalue
I19057_3_seq1	I19057_3_seq2	I19059_5_seq1	I19064_11_seq2	BAAAA	ABAAA	AABAA	AAABA	introgression	DFO_stat	DFO_Pvalue	DIL_stat	DIL_Pvalue	DFI_stat	DFI_Pvalue	DOL_stat	DOL_Pvalue
I19057_3_seq1	I19057_3_seq2	I19059_5_seq1	I19065_12_seq1	BAAAA	ABAAA	AABAA	AAABA	introgression	DFO_stat	DFO_Pvalue	DIL_stat	DIL_Pvalue	DFI_stat	DFI_Pvalue	DOL_stat	DOL_Pvalue
I19057_3_seq1	I19057_3_seq2	I19059_5_seq1	I19065_12_seq2	BAAAA	ABAAA	AABAA	AAABA	introgression	DFO_stat	DFO_Pvalue	DIL_stat	DIL_Pvalue	DFI_stat	DFI_Pvalue	DOL_stat	DOL_Pvalue
I19057_3_seq1	I19057_3_seq2	I19059_5_seq1	I19066_13_seq1	BAAAA	ABAAA	AABAA	AAABA	introgression	DFO_stat	DFO_Pvalue	DIL_stat	DIL_Pvalue	DFI_stat	DFI_Pvalue	DOL_stat	DOL_Pvalue
I19057_3_seq1	I19057_3_seq2	I19059_5_seq1	I19066_13_seq2	BAAAA	ABAAA	AABAA	AAABA	introgression	DFO_stat	DFO_Pvalue	DIL_stat	DIL_Pvalue	DFI_stat	DFI_Pvalue	DOL_stat	DOL_Pvalue
I19057_3_seq1	I19057_3_seq2	I19059_5_seq1	I19067_14_seq1	BAAAA	ABAAA	AABAA	AAABA	introgression	DFO_stat	DFO_Pvalue	DIL_stat	DIL_Pvalue	DFI_stat	DFI_Pvalue	DOL_stat	DOL_Pvalue
I19057_3_seq1	I19057_3_seq2	I19059_5_seq1	I19067_14_seq2	BAAAA	ABAAA	AABAA	AAABA	introgression	DFO_stat	DFO_Pvalue	DIL_stat	DIL_Pvalue	DFI_stat	DFI_Pvalue	DOL_stat	DOL_Pvalue
I19057_3_seq1	I19057_3_seq2	I19059_5_seq1	I19068_16_seq1	BAAAA	ABAAA	AABAA	AAABA	introgression	DFO_stat	DFO_Pvalue	DIL_stat	DIL_Pvalue	DFI_stat	DFI_Pvalue	DOL_stat	DOL_Pvalue
I19057_3_seq1	I19057_3_seq2	I19059_5_seq1	I19068_16_seq2	BAAAA	ABAAA	AABAA	AAABA	introgression	DFO_stat	DFO_Pvalue	DIL_stat	DIL_Pvalue	DFI_stat	DFI_Pvalue	DOL_stat	DOL_Pvalue
I19057_3_seq1	I19057_3_seq2	I19059_5_seq2	I19060_6_seq1	BAAAA	ABAAA	AABAA	AAABA	introgression	DFO_stat	DFO_Pvalue	DIL_stat	DIL_Pvalue	DFI_stat	DFI_Pvalue	DOL_stat	DOL_Pvalue
I19057_3_seq1	I19057_3_seq2	I19059_5_seq2	I19060_6_seq2	BAAAA	ABAAA	AABAA	AAABA	introgression	DFO_stat	DFO_Pvalue	DIL_stat	DIL_Pvalue	DFI_stat	DFI_Pvalue	DOL_stat	DOL_Pvalue
I19057_3_seq1	I19057_3_seq2	I19059_5_seq2	I19061_7_seq1	BAAAA	ABAAA	AABAA	AAABA	introgression	DFO_stat	DFO_Pvalue	DIL_stat	DIL_Pvalue	DFI_stat	DFI_Pvalue	DOL_stat	DOL_Pvalue
I19057_3_seq1	I19057_3_seq2	I19059_5_seq2	I19061_7_seq2	BAAAA	ABAAA	AABAA	AAABA	introgression	DFO_stat	DFO_Pvalue	DIL_stat	DIL_Pvalue	DFI_stat	DFI_Pvalue	DOL_stat	DOL_Pvalue
I19057_3_seq1	I19057_3_seq2	I19059_5_seq2	I19062_8_seq1	BAAAA	ABAAA	AABAA	AAABA	introgression	DFO_stat	DFO_Pvalue	DIL_stat	DIL_Pvalue	DFI_stat	DFI_Pvalue	DOL_stat	DOL_Pvalue
I19057_3_seq1	I19057_3_seq2	I19059_5_seq2	I19062_8_seq2	BAAAA	ABAAA	AABAA	AAABA	introgression	DFO_stat	DFO_Pvalue	DIL_stat	DIL_Pvalue	DFI_stat	DFI_Pvalue	DOL_stat	DOL_Pvalue
I19057_3_seq1	I19057_3_seq2	I19059_5_seq2	I19064_11_seq1	BAAAA	ABAAA	AABAA	AAABA	introgression	DFO_stat	DFO_Pvalue	DIL_stat	DIL_Pvalue	DFI_stat	DFI_Pvalue	DOL_stat	DOL_Pvalue
I19057_3_seq1	I19057_3_seq2	I19059_5_seq2	I19064_11_seq2	BAAAA	ABAAA	AABAA	AAABA	introgression	DFO_stat	DFO_Pvalue	DIL_stat	DIL_Pvalue	DFI_stat	DFI_Pvalue	DOL_stat	DOL_Pvalue
I19057_3_seq1	I19057_3_seq2	I19059_5_seq2	I19065_12_seq1	BAAAA	ABAAA	AABAA	AAABA	introgression	DFO_stat	DFO_Pvalue	DIL_stat	DIL_Pvalue	DFI_stat	DFI_Pvalue	DOL_stat	DOL_Pvalue
I19057_3_seq1	I19057_3_seq2	I19059_5_seq2	I19065_12_seq2	BAAAA	ABAAA	AABAA	AAABA	introgression	DFO_stat	DFO_Pvalue	DIL_stat	DIL_Pvalue	DFI_stat	DFI_Pvalue	DOL_stat	DOL_Pvalue
I19057_3_seq1	I19057_3_seq2	I19059_5_seq2	I19066_13_seq1	BAAAA	ABAAA	AABAA	AAABA	introgression	DFO_stat	DFO_Pvalue	DIL_stat	DIL_Pvalue	DFI_stat	DFI_Pvalue	DOL_stat	DOL_Pvalue
I19057_3_seq1	I19057_3_seq2	I19059_5_seq2	I19066_13_seq2	BAAAA	ABAAA	AABAA	AAABA	introgression	DFO_stat	DFO_Pvalue	DIL_stat	DIL_Pvalue	DFI_stat	DFI_Pvalue	DOL_stat	DOL_Pvalue
I19057_3_seq1	I19057_3_seq2	I19059_5_seq2	I19067_14_seq1	BAAAA	ABAAA	AABAA	AAABA	introgression	DFO_stat	DFO_Pvalue	DIL_stat	DIL_Pvalue	DFI_stat	DFI_Pvalue	DOL_stat	DOL_Pvalue
I19057_3_seq1	I19057_3_seq2	I19059_5_seq2	I19067_14_seq2	BAAAA	ABAAA	AABAA	AAABA	introgression	DFO_stat	DFO_Pvalue	DIL_stat	DIL_Pvalue	DFI_stat	DFI_Pvalue	DOL_stat	DOL_Pvalue
I19057_3_seq1	I19057_3_seq2	I19059_5_seq2	I19068_16_seq1	BAAAA	ABAAA	AABAA	AAABA	introgression	DFO_stat	DFO_Pvalue	DIL_stat	DIL_Pvalue	DFI_stat	DFI_Pvalue	DOL_stat	DOL_Pvalue
I19057_3_seq1	I19057_3_seq2	I19059_5_seq2	I19068_16_seq2	BAAAA	ABAAA	AABAA	AAABA	introgression	DFO_stat	DFO_Pvalue	DIL_stat	DIL_Pvalue	DFI_stat	DFI_Pvalue	DOL_stat	DOL_Pvalue
I19058_4_seq1	I19059_5_seq1	I19057_3_seq1	I19057_3_seq2	BAAAA	ABAAA	AABAA	AAABA	introgression	DFO_stat	DFO_Pvalue	DIL_stat	DIL_Pvalue	DFI_stat	DFI_Pvalue	DOL_stat	DOL_Pvalue
I19058_4_seq1	I19059_5_seq1	I19060_6_seq1	I19065_12_seq1	647	628	1379	1337	none	0.0687023	0.431672	-0.0534351	0.540807	0.0862069	0.35316	-0.0517241	0.577469
I19058_4_seq1	I19059_5_seq1	I19060_6_seq1	I19065_12_seq2	647	629	1358	1359	none	-0.00680272	0.934266	-0.0884354	0.28362	0.0677966	0.461451	-0.0338983	0.712702
I19058_4_seq1	I19059_5_seq1	I19060_6_seq1	I19066_13_seq1	645	639	1352	1232	none	0.0252101	0.783309	-0.0252101	0.783309	0.0940171	0.309177	0.042735	0.643902
I19058_4_seq1	I19059_5_seq1	I19060_6_seq1	I19066_13_seq2	647	632	1362	1344	none	0.0172414	0.852684	-0.0172414	0.852684	0.118644	0.197466	0.0847458	0.357273
I19058_4_seq1	I19059_5_seq1	I19060_6_seq1	I19067_14_seq1	663	633	1326	1259	none	0.0483871	0.590014	-0.0645161	0.472498	0.0877193	0.348972	-0.0350877	0.707932
I19058_4_seq1	I19059_5_seq1	I19060_6_seq1	I19067_14_seq2	656	643	1364	1305	none	-0.191176	0.0257819	-0.147059	0.0863478	0.0275229	0.773846	0.0825688	0.388663
I19058_4_seq1	I19059_5_seq1	I19060_6_seq1	I19068_16_seq1	598	582	1266	1284	none	0	1	0	1	0.0185185	0.84739	0.0185185	0.84739
I19058_4_seq1	I19059_5_seq1	I19060_6_seq1	I19068_16_seq2	598	581	1260	1280	none	-0.174603	0.0500056	-0.142857	0.108809	0.027027	0.775838	0.0630631	0.506428
I19058_4_seq1	I19059_5_seq1	I19060_6_seq2	I19065_12_seq1	649	632	1336	1303	none	0.257143	0.00234579	0.142857	0.0909689	0.0973451	0.300766	-0.0442478	0.638098
I19058_4_seq1	I19059_5_seq1	I19060_6_seq2	I19065_12_seq2	647	633	1304	1318	none	0.210084	0.0219203	0.109244	0.233376	0.0756303	0.409355	-0.0252101	0.783309
I19058_4_seq1	I19059_5_seq1	I19060_6_seq2	I19066_13_seq1	647	645	1320	1210	none	0.258065	0.00405714	0.209677	0.0195503	0.105263	0.261054	0.0526316	0.574149
I19058_4_seq1	I19059_5_seq1	I19060_6_seq2	I19066_13_seq2	649	636	1309	1292	none	0.235772	0.00892688	0.203252	0.0241852	0.130435	0.161886	0.0956522	0.305007
I19058_4_seq1	I19059_5_seq1	I19060_6_seq2	I19067_14_seq1	664	636	1318	1256	none	0.242857	0.0040592	0.157143	0.0629791	0.0892857	0.344704	-0.0178571	0.850107
I19058_4_seq1	I19059_5_seq1	I19060_6_seq2	I19067_14_seq2	657	647	1328	1285	none	0.047619	0.625585	0.104762	0.283051	0.0363636	0.702918	0.0909091	0.340356
I19058_4_seq1	I19059_5_seq1	I19060_6_seq2	I19068_16_seq1	597	585	1266	1277	none	0.191176	0.0257819	0.191176	0.0257819	0.0178571	0.850107	0.0178571	0.850107
I19058_4_seq1	I19059_5_seq1	I19060_6_seq2	I19068_16_seq2	599	585	1224	1243	none	0.0406504	0.652109	0.0731707	0.417077	0.0363636	0.702918	0.0727273	0.445601
I19058_4_seq1	I19059_5_seq1	I19061_7_seq1	I19065_12_seq1	677	632	1512	1351	none	0.222222	0.00766076	0.125	0.133614	0.0973451	0.300766	-0.0265487	0.777778
I19058_4_seq1	I19059_5_seq1	I19061_7_seq1	I19065_12_seq2	676	634	1478	1346	none	0.192661	0.0442795	0.119266	0.213068	0.0782609	0.401327	0.00869565	0.925705
I19058_4_seq1	I19059_5_seq1	I19061_7_seq1	I19066_13_seq1	672	642	1450	1215	none	0.193548	0.0311412	0.193548	0.0311412	0.079646	0.397191	0.079646	0.397191
I19058_4_seq1	I19059_5_seq1	I19061_7_seq1	I19066_13_seq2	674	634	1447	1308	none	0.181102	0.0412588	0.19685	0.0265282	0.113043	0.225414	0.130435	0.161886
I19058_4_seq1	I19059_5_seq1	I19061_7_seq1	I19067_14_seq1	692	636	1468	1281	none	0.191781	0.0204876	0.150685	0.0686475	0.0892857	0.344704	0.0357143	0.705457
I19058_4_seq1	I19059_5_seq1	I19061_7_seq1	I19067_14_seq2	684	646	1489	1318	none	-0.0188679	0.845975	0.0754717	0.437142	0.037037	0.700311	0.12963	0.177932
I19058_4_seq1	I19059_5_seq1	I19061_7_seq1	I19068_16_seq1	621	584	1381	1274	none	0.121622	0.138982	0.162162	0.0485197	-0.027027	0.775838	0.027027	0.775838
I19058_4_seq1	I19059_5_seq1	I19061_7_seq1	I19068_16_seq2	625	583	1355	1259	none	0	1	0.0588235	0.492717	0.0275229	0.773846	0.100917	0.292062
I19058_4_seq1	I19059_5_seq1	I19061_7_seq2	I19065_12_seq1	677	632	1416	1355	none	0.078125	0.376759	-0.03125	0.723674	0.142857	0.13057	0.0178571	0.850107
I19058_4_seq1	I19059_5_seq1	I19061_7_seq2	I19065_12_seq2	675	637	1376	1350	none	-0.0204082	0.804571	-0.0748299	0.364267	0.0973451	0.300766	0.0265487	0.777778
I19058_4_seq1	I19059_5_seq1	I19061_7_seq2	I19066_13_seq1	669	645	1367	1228	none	-0.0166667	0.855132	-0.0333333	0.715001	0.115044	0.221353	0.0973451	0.300766
I19058_4_seq1	I19059_5_seq1	I19061_7_seq2	I19066_13_seq2	672	638	1374	1341	none	-0.027027	0.775838	-0.027027	0.775838	0.135135	0.154523	0.135135	0.154523
I19058_4_seq1	I19059_5_seq1	I19061_7_seq2	I19067_14_seq1	689	637	1392	1307	none	0.00775194	0.929841	-0.0542636	0.537686	0.117117	0.217238	0.045045	0.635087
I19058_4_seq1	I19059_5_seq1	I19061_7_seq2	I19067_14_seq2	682	651	1386	1318	none	-0.214286	0.0112299	-0.157143	0.0629791	0.047619	0.625585	0.12381	0.204559
I19058_4_seq1	I19059_5_seq1	I19061_7_seq2	I19068_16_seq1	621	586	1316	1308	none	-0.100775	0.252381	-0.0542636	0.537686	0	1	0.0545455	0.567269
I19058_4_seq1	I19059_5_seq1	I19061_7_seq2	I19068_16_seq2	624	586	1277	1270	none	-0.254237	0.00574971	-0.169492	0.0655997	0.0188679	0.845975	0.113208	0.243799
I19058_4_seq1	I19059_5_seq1	I19062_8_seq1	I19065_12_seq1	664	609	1482	1358	none	0.204969	0.00930163	0.10559	0.180314	0.101695	0.269294	-0.0338983	0.712702
I19058_4_seq1	I19059_5_seq1	I19062_8_seq1	I19065_12_seq2	661	610	1420	1333	none	0.181102	0.0412588	0.102362	0.248679	0.0731707	0.417077	-0.00813008	0.928155
I19058_4_seq1	I19059_5_seq1	I19062_8_seq1	I19066_13_seq1	659	617	1405	1199	none	0.180556	0.0302603	0.152778	0.066753	0.092437	0.313278	0.0588235	0.521075
I19058_4_seq1	I19059_5_seq1	I19062_8_seq1	I19066_13_seq2	663	612	1426	1314	none	0.194245	0.0220149	0.165468	0.0510767	0.118644	0.197466	0.0847458	0.357273
I19058_4_seq1	I19059_5_seq1	I19062_8_seq1	I19067_14_seq1	681	612	1421	1292	none	0.23871	0.00295952	0.122581	0.126981	0.113043	0.225414	-0.0434783	0.641035
I19058_4_seq1	I19059_5_seq1	I19062_8_seq1	I19067_14_seq2	671	619	1453	1327	none	0	1	0.0645161	0.472498	0.042735	0.643902	0.111111	0.229421
I19058_4_seq1	I19059_5_seq1	I19062_8_seq1	I19068_16_seq1	622	579	1346	1261	none	0.148936	0.0769742	0.177305	0.0352583	0.0363636	0.702918	0.0727273	0.445601
I19058_4_seq1	I19059_5_seq1	I19062_8_seq1	I19068_16_seq2	622	575	1324	1253	none	0	1	0.0704225	0.401368	0.0265487	0.777778	0.115044	0.221353
I19058_4_seq1	I19059_5_seq1	I19062_8_seq2	I19065_12_seq1	665	613	1434	1347	none	0.176471	0.0395918	0.0147059	0.863832	0.155172	0.0946707	-0.0344828	0.710347
I19058_4_seq1	I19059_5_seq1	I19062_8_seq2	I19065_12_seq2	662	615	1400	1346	none	0.0943396	0.234213	-0.0188679	0.811947	0.133333	0.144127	-0.0166667	0.855132
I19058_4_seq1	I19059_5_seq1	I19062_8_seq2	I19066_13_seq1	661	622	1396	1223	none	0.169492	0.0655997	0.0847458	0.357273	0.155172	0.0946707	0.0689655	0.457614
I19058_4_seq1	I19059_5_seq1	I19062_8_seq2	I19066_13_seq2	665	617	1384	1314	none	0.175439	0.0610447	0.105263	0.261054	0.165217	0.0764345	0.0956522	0.305007
I19058_4_seq1	I19059_5_seq1	I19062_8_seq2	I19067_14_seq1	682	616	1364	1263	none	0.219512	0.014912	0.0243902	0.786775	0.168142	0.0738778	-0.0442478	0.638098
I19058_4_seq1	I19059_5_seq1	I19062_8_seq2	I19067_14_seq2	673	624	1400	1299	none	-0.0647482	0.445243	-0.0647482	0.445243	0.0973451	0.300766	0.0973451	0.300766
I19058_4_seq1	I19059_5_seq1	I19062_8_seq2	I19068_16_seq1	622	585	1302	1269	none	0.0973451	0.300766	0.079646	0.397191	0.0841121	0.384266	0.0654206	0.498586
I19058_4_seq1	I19059_5_seq1	I19062_8_seq2	I19068_16_seq2	623	582	1278	1253	none	-0.0833333	0.36131	-0.05	0.583882	0.0727273	0.445601	0.109091	0.252559
I19058_4_seq1	I19059_5_seq1	I19064_11_seq1	I19060_6_seq1	640	604	1096	1168	none	0.0782609	0.401327	0.00869565	0.925705	0.178571	0.0587817	0.107143	0.256839
I19058_4_seq1	I19059_5_seq1	I19064_11_seq1	I19060_6_seq2	636	608	1130	1196	none	-0.151079	0.0748803	-0.208633	0.0139035	0.142857	0.13057	0.0714286	0.449692
I19058_4_seq1	I19059_5_seq1	I19064_11_seq1	I19061_7_seq1	665	606	1128	1327	none	-0.106383	0.206507	-0.205674	0.0145964	0.175439	0.0610447	0.0526316	0.574149
I19058_4_seq1	I19059_5_seq1	I19064_11_seq1	I19061_7_seq2	664	609	1188	1286	none	0.116279	0.186609	0.0232558	0.791676	0.168142	0.0738778	0.0619469	0.510214
I19058_4_seq1	I19059_5_seq1	I19064_11_seq1	I19062_8_seq1	655	598	1127	1274	none	-0.134328	0.119955	-0.164179	0.0573662	0.171171	0.0713254	0.135135	0.154523
I19058_4_seq1	I19059_5_seq1	I19064_11_seq1	I19062_8_seq2	656	603	1135	1252	none	-0.0784314	0.428292	-0.0784314	0.428292	0.166667	0.0832645	0.166667	0.0832645
I19058_4_seq1	I19059_5_seq1	I19064_11_seq1	I19065_12_seq1	662	605	1190	1225	none	0.132075	0.173893	-0.113208	0.243799	0.222222	0.0209213	-0.0185185	0.84739
I19058_4_seq1	I19059_5_seq1	I19064_11_seq1	I19065_12_seq2	657	603	1184	1273	none	0.0547945	0.507917	-0.109589	0.185447	0.189655	0.0410872	-0.0172414	0.852684
I19058_4_seq1	I19059_5_seq1	I19064_11_seq1	I19066_13_seq1	658	613	1145	1105	none	0.173913	0.0952928	0	1	0.222222	0.0209213	0.0740741	0.441418
I19058_4_seq1	I19059_5_seq1	I19064_11_seq1	I19066_13_seq2	659	613	1181	1246	none	0.125	0.220671	-0.0208333	0.838256	0.207547	0.0326119	0.0754717	0.437142
I19058_4_seq1	I19059_5_seq1	I19064_11_seq1	I19067_14_seq1	677	606	1157	1172	none	0.14	0.161513	-0.04	0.689157	0.207547	0.0326119	0.0377358	0.697635
I19058_4_seq1	I19059_5_seq1	I19064_11_seq1	I19067_14_seq2	666	616	1200	1235	none	-0.12	0.179712	-0.136	0.128379	0.12381	0.204559	0.104762	0.283051
I19058_4_seq1	I19059_5_seq1	I19064_11_seq1	I19068_16_seq1	616	574	1120	1227	none	0.12381	0.204559	0.0285714	0.769698	0.173077	0.0775562	0.0769231	0.432768
I19058_4_seq1	I19059_5_seq1	I19064_11_seq1	I19068_16_seq2	615	576	1099	1211	none	-0.140187	0.147029	-0.140187	0.147029	0.117647	0.234764	0.117647	0.234764
I19058_4_seq1	I19059_5_seq1	I19064_11_seq2	I19060_6_seq1	639	598	1160	1219	none	0.182482	0.032688	0.19708	0.0210679	0.0619469	0.510214	0.079646	0.397191
I19058_4_seq1	I19059_5_seq1	I19064_11_seq2	I19060_6_seq2	636	601	1103	1159	none	-0.049505	0.618823	-0.029703	0.765313	0.0526316	0.574149	0.0701754	0.453695
I19058_4_seq1	I19059_5_seq1	I19064_11_seq2	I19061_7_seq1	668	601	1141	1338	none	0.0196078	0.843022	-0.0196078	0.843022	0.0990991	0.296451	0.0630631	0.506428
I19058_4_seq1	I19059_5_seq1	I19064_11_seq2	I19061_7_seq2	666	605	1165	1261	none	0.228571	0.00684086	0.214286	0.0112299	0.0990991	0.296451	0.0810811	0.392971
I19058_4_seq1	I19059_5_seq1	I19064_11_seq2	I19062_8_seq1	655	597	1130	1274	none	-0.02	0.841481	0.04	0.689157	0.0990991	0.296451	0.153153	0.106621
I19058_4_seq1	I19059_5_seq1	I19064_11_seq2	I19062_8_seq2	656	601	1125	1233	none	0.056	0.53125	0.136	0.128379	0.100917	0.292062	0.192661	0.0442795
I19058_4_seq1	I19059_5_seq1	I19064_11_seq2	I19065_12_seq1	663	594	1206	1227	none	0.235772	0.00892688	0.121951	0.176214	0.135135	0.154523	0.00900901	0.924382
I19058_4_seq1	I19059_5_seq1	I19064_11_seq2	I19065_12_seq2	660	597	1151	1214	none	0.215686	0.0293819	0.117647	0.234764	0.105263	0.261054	0.0175439	0.851412
I19058_4_seq1	I19059_5_seq1	I19064_11_seq2	I19066_13_seq1	657	604	1159	1100	none	0.256198	0.00482965	0.206612	0.0230426	0.132743	0.158221	0.079646	0.397191
I19058_4_seq1	I19059_5_seq1	I19064_11_seq2	I19066_13_seq2	659	600	1110	1157	none	0.238938	0.0110869	0.20354	0.0304906	0.135135	0.154523	0.0990991	0.296451
I19058_4_seq1	I19059_5_seq1	I19064_11_seq2	I19067_14_seq1	676	598	1189	1200	none	0.220588	0.0100973	0.147059	0.0863478	0.109091	0.252559	0.0181818	0.848767
I19058_4_seq1	I19059_5_seq1	I19064_11_seq2	I19067_14_seq2	667	609	1192	1220	none	-0.0103093	0.919126	0.0721649	0.477244	0.0566038	0.560047	0.132075	0.173893
I19058_4_seq1	I19059_5_seq1	I19064_11_seq2	I19068_16_seq1	615	566	1139	1217	123	0.255814	0.00366681	0.255814	0.00366681	0.0654206	0.498586	0.0654206	0.498586
I19058_4_seq1	I19059_5_seq1	I19064_11_seq2	I19068_16_seq2	615	566	1116	1195	none	0.0243902	0.786775	0.105691	0.241129	0.0377358	0.697635	0.132075	0.173893
I19058_4_seq1	I19059_5_seq1	I19067_14_seq1	I19065_12_seq1	688	630	1082	1073	none	0	1	-0.0666667	0.527089	0.0566038	0.560047	0	1
I19058_4_seq1	I19059_5_seq1	I19067_14_seq1	I19065_12_seq2	684	630	1125	1174	none	-0.0629371	0.45168	-0.0769231	0.357643	0.0526316	0.574149	0.0350877	0.707932
I19058_4_seq1	I19059_5_seq1	I19067_14_seq1	I19066_13_seq1	685	646	1054	986	none	-0.0105263	0.918282	0.0315789	0.758239	0.0384615	0.694887	0.0769231	0.432768
I19058_4_seq1	I19059_5_seq1	I19067_14_seq1	I19066_13_seq2	688	638	1115	1138	none	-0.0485437	0.62225	-0.00970874	0.921509	0.0943396	0.331406	0.132075	0.173893
I19058_4_seq1	I19059_5_seq1	I19067_14_seq2	I19065_12_seq1	678	637	1147	1126	none	0.224806	0.0106705	0.0542636	0.537686	0.166667	0.0832645	-0.037037	0.700311
I19058_4_seq1	I19059_5_seq1	I19067_14_seq2	I19065_12_seq2	677	643	1109	1135	none	0.212121	0.0348085	0.0505051	0.615303	0.137615	0.150792	-0.00917431	0.923693
I19058_4_seq1	I19059_5_seq1	I19067_14_seq2	I19066_13_seq1	676	656	1126	1039	none	0.260504	0.00448645	0.142857	0.119141	0.142857	0.143235	0.00952381	0.922258
I19058_4_seq1	I19059_5_seq1	I19067_14_seq2	I19066_13_seq2	678	647	1085	1085	none	0.243243	0.0103854	0.135135	0.154523	0.169811	0.0804096	0.0566038	0.560047
I19058_4_seq1	I19059_5_seq1	I19068_16_seq1	I19065_12_seq1	616	580	1139	1059	none	0.0701754	0.453695	-0.0350877	0.707932	0.0642202	0.502553	-0.0458716	0.632
I19058_4_seq1	I19059_5_seq1	I19068_16_seq1	I19065_12_seq2	615	581	1146	1126	none	-0.0428571	0.61209	-0.114286	0.176296	0.0619469	0.510214	-0.0265487	0.777778
I19058_4_seq1	I19059_5_seq1	I19068_16_seq1	I19066_13_seq1	616	591	1105	960	none	0.0384615	0.694887	0.0192308	0.844519	0.0458716	0.632	0.0275229	0.773846
I19058_4_seq1	I19059_5_seq1	I19068_16_seq1	I19066_13_seq2	618	585	1122	1072	none	-0.029703	0.765313	-0.00990099	0.920738	0.0458716	0.632	0.0642202	0.502553
I19058_4_seq1	I19059_5_seq1	I19068_16_seq1	I19067_14_seq1	630	586	1045	974	none	0.0619469	0.510214	-0.0442478	0.638098	0.0666667	0.494525	-0.047619	0.625585
I19058_4_seq1	I19059_5_seq1	I19068_16_seq1	I19067_14_seq2	623	594	1068	1031	none	-0.194245	0.0220149	-0.122302	0.149325	-0.00934579	0.922986	0.0841121	0.384266
I19058_4_seq1	I19059_5_seq1	I19068_16_seq2	I19065_12_seq1	618	580	1153	1069	none	0.215686	0.0293819	0.0392157	0.692061	0.142857	0.143235	-0.0285714	0.769698
I19058_4_seq1	I19059_5_seq1	I19068_16_seq2	I19065_12_seq2	615	579	1109	1067	none	0.100775	0.252381	-0.00775194	0.929841	0.107143	0.256839	-0.0178571	0.850107
I19058_4_seq1	I19059_5_seq1	I19068_16_seq2	I19066_13_seq1	621	593	1084	928	none	0.244898	0.0153351	0.163265	0.106042	0.12381	0.204559	0.047619	0.625585
I19058_4_seq1	I19059_5_seq1	I19068_16_seq2	I19066_13_seq2	623	589	1100	1039	none	0.246753	0.0303685	0.194805	0.0873753	0.117647	0.234764	0.0784314	0.428292
I19058_4_seq1	I19059_5_seq1	I19068_16_seq2	I19067_14_seq1	633	583	1067	977	none	0.27619	0.0046532	0.142857	0.143235	0.137255	0.165684	0	1
I19058_4_seq1	I19059_5_seq1	I19068_16_seq2	I19067_14_seq2	626	597	1054	999	none	-0.0175439	0.851412	0.0175439	0.851412	0.030303	0.763025	0.0707071	0.481728
I19058_4_seq1	I19059_5_seq2	I19057_3_seq1	I19057_3_seq2	BAAAA	ABAAA	AABAA	AAABA	introgression	DFO_stat	DFO_Pvalue	DIL_stat	DIL_Pvalue	DFI_stat	DFI_Pvalue	DOL_stat	DOL_Pvalue
I19058_4_seq1	I19059_5_seq2	I19060_6_seq1	I19065_12_seq1	725	673	1377	1339	none	0.0551181	0.534501	0.0393701	0.657275	0.0485437	0.62225	0.0291262	0.767537
I19058_4_seq1	I19059_5_seq2	I19060_6_seq1	I19065_12_seq2	703	674	1361	1367	none	0.020979	0.801913	0.230769	0.00578724	-0.129771	0.137465	0.0992366	0.256034
I19058_4_seq1	I19059_5_seq2	I19060_6_seq1	I19066_13_seq1	715	673	1353	1230	none	0.0508475	0.580712	0.0508475	0.580712	0.0350877	0.707932	0.0350877	0.707932
I19058_4_seq1	I19059_5_seq2	I19060_6_seq1	I19066_13_seq2	719	669	1363	1346	none	0.0526316	0.574149	0.0175439	0.851412	0.079646	0.397191	0.0442478	0.638098
I19058_4_seq1	I19059_5_seq2	I19060_6_seq1	I19067_14_seq1	742	684	1327	1264	none	0.0420168	0.646702	-0.00840336	0.92696	0.0291262	0.767537	-0.0291262	0.767537
I19058_4_seq1	I19059_5_seq2	I19060_6_seq1	I19067_14_seq2	710	686	1366	1301	none	-0.140741	0.101995	0.259259	0.00259259	-0.2	0.0225869	0.215385	0.0140586
I19058_4_seq1	I19059_5_seq2	I19060_6_seq1	I19068_16_seq1	673	627	1267	1285	none	0	1	0.0689655	0.457614	-0.0408163	0.686168	0.0408163	0.686168
I19058_4_seq1	I19059_5_seq2	I19060_6_seq1	I19068_16_seq2	672	619	1261	1271	none	-0.125	0.157299	-0.109375	0.215925	0.00917431	0.923693	0.0275229	0.773846
I19058_4_seq1	I19059_5_seq2	I19060_6_seq2	I19065_12_seq1	702	670	1334	1308	none	0.223881	0.00955293	-0.104478	0.226503	0.190476	0.0325094	-0.15873	0.0747914
I19058_4_seq1	I19059_5_seq2	I19060_6_seq2	I19065_12_seq2	702	670	1306	1329	none	0.221239	0.0186827	0.115044	0.221353	0.19403	0.0247003	0.104478	0.226503
I19058_4_seq1	I19059_5_seq2	I19060_6_seq2	I19066_13_seq1	692	672	1320	1211	none	0.272727	0.0026998	-0.123967	0.172682	0.19708	0.0210679	-0.153285	0.0727891
I19058_4_seq1	I19059_5_seq2	I19060_6_seq2	I19066_13_seq2	696	666	1309	1298	none	0.243697	0.00785067	-0.159664	0.0815562	0.220588	0.0100973	-0.132353	0.122713
I19058_4_seq1	I19059_5_seq2	I19060_6_seq2	I19067_14_seq1	719	680	1318	1264	none	0.227273	0.00902344	-0.151515	0.0817228	0.190476	0.0325094	-0.206349	0.0205439
I19058_4_seq1	I19059_5_seq2	I19060_6_seq2	I19067_14_seq2	711	684	1330	1285	none	0.0891089	0.370502	0.168317	0.0907293	0.160305	0.0665385	0.221374	0.0112852
I19058_4_seq1	I19059_5_seq2	I19060_6_seq2	I19068_16_seq1	648	622	1265	1281	none	0.164179	0.0573662	-0.0895522	0.299903	0.125	0.157299	-0.140625	0.111612
I19058_4_seq1	I19059_5_seq2	I19060_6_seq2	I19068_16_seq2	652	618	1225	1239	none	0.0655738	0.46889	-0.278689	0.00208244	0.193798	0.027727	-0.131783	0.134454
I19058_4_seq1	I19059_5_seq2	I19061_7_seq1	I19065_12_seq1	728	684	1515	1354	none	0.205674	0.0145964	-0.134752	0.109579	0.241935	0.00705833	-0.145161	0.105998
I19058_4_seq1	I19059_5_seq2	I19061_7_seq1	I19065_12_seq2	730	684	1485	1354	none	0.226415	0.0197488	0.0943396	0.331406	0.259843	0.00340847	0.149606	0.0918002
I19058_4_seq1	I19059_5_seq2	I19061_7_seq1	I19066_13_seq1	715	684	1459	1213	none	0.245902	0.00660615	-0.180328	0.0463945	0.233083	0.00718726	-0.157895	0.0686174
I19058_4_seq1	I19059_5_seq2	I19061_7_seq1	I19066_13_seq2	720	679	1455	1311	none	0.216	0.0157372	-0.184	0.0396687	0.272727	0.00172795	-0.106061	0.223017
I19058_4_seq1	I19059_5_seq2	I19061_7_seq1	I19067_14_seq1	744	696	1476	1286	none	0.202899	0.017148	-0.173913	0.0410509	0.239669	0.00837999	-0.190083	0.0365362
I19058_4_seq1	I19059_5_seq2	I19061_7_seq1	I19067_14_seq2	735	698	1499	1315	none	0.0576923	0.556298	0.0961538	0.3268	0.206349	0.0205439	0.238095	0.00752632
I19058_4_seq1	I19059_5_seq2	I19061_7_seq1	I19068_16_seq1	669	633	1387	1275	none	0.131034	0.114597	-0.131034	0.114597	0.129032	0.150763	-0.177419	0.0481935
I19058_4_seq1	I19059_5_seq2	I19061_7_seq1	I19068_16_seq2	675	626	1361	1251	none	0.0434783	0.609523	-0.275362	0.00121739	0.228346	0.0100724	-0.11811	0.183178
I19058_4_seq1	I19059_5_seq2	I19061_7_seq2	I19065_12_seq1	750	684	1424	1359	none	0.0420168	0.646702	0.0588235	0.521075	0.0505051	0.615303	0.0707071	0.481728
I19058_4_seq1	I19059_5_seq2	I19061_7_seq2	I19065_12_seq2	727	686	1386	1357	none	-0.0138889	0.867632	0.236111	0.00460653	-0.131783	0.134454	0.147287	0.0943555
I19058_4_seq1	I19059_5_seq2	I19061_7_seq2	I19066_13_seq1	737	684	1378	1226	none	0	1	0.0517241	0.577469	0.0185185	0.84739	0.0740741	0.441418
I19058_4_seq1	I19059_5_seq2	I19061_7_seq2	I19066_13_seq2	741	679	1383	1343	none	-0.0185185	0.84739	0.037037	0.700311	0.0377358	0.697635	0.0943396	0.331406
I19058_4_seq1	I19059_5_seq2	I19061_7_seq2	I19067_14_seq1	766	695	1403	1313	none	-0.0169492	0.853923	0	1	0	1	0.0208333	0.838256
I19058_4_seq1	I19059_5_seq2	I19061_7_seq2	I19067_14_seq2	732	699	1397	1314	none	-0.182482	0.032688	0.240876	0.00481165	-0.232	0.0094911	0.232	0.0094911
I19058_4_seq1	I19059_5_seq2	I19061_7_seq2	I19068_16_seq1	695	632	1322	1308	none	-0.133858	0.131425	0.0551181	0.534501	-0.14	0.161513	0.1	0.317311
I19058_4_seq1	I19059_5_seq2	I19061_7_seq2	I19068_16_seq2	697	626	1284	1261	none	-0.226891	0.0133204	-0.092437	0.313278	-0.0679612	0.490364	0.0873786	0.375189
I19058_4_seq1	I19059_5_seq2	I19062_8_seq1	I19065_12_seq1	715	667	1488	1364	none	0.202614	0.0122036	-0.137255	0.0895551	0.212121	0.0148061	-0.181818	0.0367139
I19058_4_seq1	I19059_5_seq2	I19062_8_seq1	I19065_12_seq2	717	666	1430	1339	none	0.216667	0.0176221	0.0833333	0.36131	0.211679	0.0132256	0.0948905	0.266713
I19058_4_seq1	I19059_5_seq2	I19062_8_seq1	I19066_13_seq1	703	664	1415	1199	none	0.214286	0.0112299	-0.157143	0.0629791	0.188811	0.0239548	-0.174825	0.0365635
I19058_4_seq1	I19059_5_seq2	I19062_8_seq1	I19066_13_seq2	708	662	1435	1319	none	0.233083	0.00718726	-0.172932	0.0461135	0.223022	0.00855393	-0.165468	0.0510767
I19058_4_seq1	I19059_5_seq2	I19062_8_seq1	I19067_14_seq1	734	677	1428	1298	none	0.234899	0.00413975	-0.167785	0.0405522	0.215385	0.0140586	-0.246154	0.00500696
I19058_4_seq1	I19059_5_seq2	I19062_8_seq1	I19067_14_seq2	722	678	1464	1326	none	0.0598291	0.517535	0.0940171	0.309177	0.144928	0.0886592	0.173913	0.0410509
I19058_4_seq1	I19059_5_seq2	I19062_8_seq1	I19068_16_seq1	674	628	1350	1262	none	0.151079	0.0748803	-0.136691	0.107058	0.15625	0.0770999	-0.15625	0.0770999
I19058_4_seq1	I19059_5_seq2	I19062_8_seq1	I19068_16_seq2	676	623	1333	1249	none	0.0441176	0.606905	-0.279412	0.00112013	0.175573	0.0444821	-0.160305	0.0665385
I19058_4_seq1	I19059_5_seq2	I19062_8_seq2	I19065_12_seq1	741	669	1437	1354	none	0.15625	0.0770999	0.109375	0.215925	0.0754717	0.437142	0.0188679	0.845975
I19058_4_seq1	I19059_5_seq2	I19062_8_seq2	I19065_12_seq2	716	668	1405	1353	none	0.0980392	0.225253	0.294118	0.000274727	-0.124088	0.146388	0.0948905	0.266713
I19058_4_seq1	I19059_5_seq2	I19062_8_seq2	I19066_13_seq1	730	667	1402	1224	none	0.20354	0.0304906	0.132743	0.158221	0.0689655	0.457614	0	1
I19058_4_seq1	I19059_5_seq2	I19062_8_seq2	I19066_13_seq2	734	665	1389	1319	none	0.2	0.0359389	0.145455	0.127124	0.0877193	0.348972	0.0350877	0.707932
I19058_4_seq1	I19059_5_seq2	I19062_8_seq2	I19067_14_seq1	759	679	1367	1270	none	0.2	0.031972	0.0782609	0.401327	0.0576923	0.556298	-0.0769231	0.432768
I19058_4_seq1	I19059_5_seq2	I19062_8_seq2	I19067_14_seq2	724	680	1405	1298	none	-0.0298507	0.729683	0.328358	0.000144101	-0.176471	0.0395918	0.176471	0.0395918
I19058_4_seq1	I19059_5_seq2	I19062_8_seq2	I19068_16_seq1	700	632	1301	1270	none	0.079646	0.397191	0.168142	0.0738778	-0.029703	0.765313	0.0693069	0.486099
I19058_4_seq1	I19059_5_seq2	I19062_8_seq2	I19068_16_seq2	700	628	1282	1249	none	-0.0517241	0.577469	0	1	-0.0280374	0.7718	0.0280374	0.7718
I19058_4_seq1	I19059_5_seq2	I19064_11_seq1	I19060_6_seq1	708	649	1101	1171	none	0.0727273	0.445601	-0.0727273	0.445601	0.188119	0.0586817	0.029703	0.765313
I19058_4_seq1	I19059_5_seq2	I19064_11_seq1	I19060_6_seq2	680	645	1138	1197	none	-0.134328	0.119955	0.0746269	0.38766	-0.0625	0.4795	0.15625	0.0770999
I19058_4_seq1	I19059_5_seq2	I19064_11_seq1	I19061_7_seq1	705	659	1133	1335	none	-0.117647	0.170067	0.102941	0.229949	-0.047619	0.59298	0.190476	0.0325094
I19058_4_seq1	I19059_5_seq2	I19064_11_seq1	I19061_7_seq2	729	660	1193	1296	none	0.138211	0.125316	-0.0731707	0.417077	0.188119	0.0586817	-0.0693069	0.486099
I19058_4_seq1	I19059_5_seq2	I19064_11_seq1	I19062_8_seq1	704	655	1133	1282	none	-0.140625	0.111612	0.15625	0.0770999	-0.078125	0.376759	0.21875	0.0133283
I19058_4_seq1	I19059_5_seq2	I19064_11_seq1	I19062_8_seq2	730	656	1139	1254	none	-0.0707071	0.481728	-0.151515	0.131668	0.156863	0.11314	0.0784314	0.428292
I19058_4_seq1	I19059_5_seq2	I19064_11_seq1	I19065_12_seq1	726	656	1195	1231	none	0.113402	0.264045	-0.0309278	0.760668	0.170213	0.0988869	0.0212766	0.836569
I19058_4_seq1	I19059_5_seq2	I19064_11_seq1	I19065_12_seq2	700	653	1192	1284	none	0.0791367	0.350816	0.194245	0.0220149	-0.046875	0.595883	0.078125	0.376759
I19058_4_seq1	I19059_5_seq2	I19064_11_seq1	I19066_13_seq1	714	654	1154	1107	none	0.218391	0.0416487	-0.0114943	0.914621	0.184466	0.0611892	-0.00970874	0.921509
I19058_4_seq1	I19059_5_seq2	I19064_11_seq1	I19066_13_seq2	716	653	1185	1248	none	0.16129	0.119844	-0.0322581	0.755736	0.188119	0.0586817	0.00990099	0.920738
I19058_4_seq1	I19059_5_seq2	I19064_11_seq1	I19067_14_seq1	741	663	1166	1182	none	0.142857	0.172955	-0.0769231	0.463071	0.170213	0.0988869	-0.0425532	0.679923
I19058_4_seq1	I19059_5_seq2	I19064_11_seq1	I19067_14_seq2	705	666	1211	1237	none	-0.0756303	0.409355	0.243697	0.00785067	-0.129032	0.150763	0.177419	0.0481935
I19058_4_seq1	I19059_5_seq2	I19064_11_seq1	I19068_16_seq1	683	622	1124	1230	none	0.108911	0.273718	0.0693069	0.486099	0.11828	0.254017	0.0752688	0.467921
I19058_4_seq1	I19059_5_seq2	I19064_11_seq1	I19068_16_seq2	680	620	1107	1208	none	-0.0980392	0.322102	-0.137255	0.165684	0.0721649	0.477244	0.0309278	0.760668
I19058_4_seq1	I19059_5_seq2	I19064_11_seq2	I19060_6_seq1	683	637	1163	1221	none	0.164179	0.0573662	-0.208955	0.0155704	0.228346	0.0100724	-0.165354	0.0623992
I19058_4_seq1	I19059_5_seq2	I19064_11_seq2	I19060_6_seq2	680	633	1109	1159	none	-0.0408163	0.686168	-0.102041	0.312422	0.221374	0.0112852	0.175573	0.0444821
I19058_4_seq1	I19059_5_seq2	I19064_11_seq2	I19061_7_seq1	709	650	1146	1347	none	-0.0103093	0.919126	-0.0515464	0.611683	0.262295	0.00376577	0.229508	0.0112447
I19058_4_seq1	I19059_5_seq2	I19064_11_seq2	I19061_7_seq2	706	650	1168	1270	none	0.235294	0.00606997	-0.205882	0.0163512	0.253968	0.00436112	-0.222222	0.0126157
I19058_4_seq1	I19059_5_seq2	I19064_11_seq2	I19062_8_seq1	705	644	1132	1277	none	-0.029703	0.765313	0.00990099	0.920738	0.236641	0.00675917	0.267176	0.00222846
I19058_4_seq1	I19059_5_seq2	I19064_11_seq2	I19062_8_seq2	704	650	1129	1236	none	0.056	0.53125	-0.28	0.00174512	0.221374	0.0112852	-0.0992366	0.256034
I19058_4_seq1	I19059_5_seq2	I19064_11_seq2	I19065_12_seq1	699	641	1210	1233	none	0.206897	0.0258576	-0.206897	0.0258576	0.232	0.0094911	-0.152	0.0892416
I19058_4_seq1	I19059_5_seq2	I19064_11_seq2	I19065_12_seq2	703	644	1158	1225	none	0.234043	0.0232606	0.0851064	0.409294	0.248	0.00555892	0.136	0.128379
I19058_4_seq1	I19059_5_seq2	I19064_11_seq2	I19066_13_seq1	687	641	1167	1102	none	0.286957	0.00208909	-0.2	0.031972	0.233083	0.00718726	-0.18797	0.0301758
I19058_4_seq1	I19059_5_seq2	I19064_11_seq2	I19066_13_seq2	690	640	1116	1162	none	0.254545	0.00759201	-0.218182	0.0221195	0.251908	0.00393628	-0.145038	0.0969069
I19058_4_seq1	I19059_5_seq2	I19064_11_seq2	I19067_14_seq1	715	650	1196	1209	none	0.203125	0.0215563	-0.21875	0.0133283	0.219512	0.014912	-0.219512	0.014912
I19058_4_seq1	I19059_5_seq2	I19064_11_seq2	I19067_14_seq2	706	655	1201	1221	none	0.0322581	0.755736	0.0752688	0.467921	0.190476	0.0325094	0.222222	0.0126157
I19058_4_seq1	I19059_5_seq2	I19064_11_seq2	I19068_16_seq1	653	610	1141	1219	none	0.21875	0.0133283	-0.09375	0.288844	0.174603	0.0500056	-0.142857	0.108809
I19058_4_seq1	I19059_5_seq2	I19064_11_seq2	I19068_16_seq2	656	606	1122	1190	none	0.0491803	0.586982	-0.278689	0.00208244	0.206349	0.0205439	-0.111111	0.212317
I19058_4_seq1	I19059_5_seq2	I19067_14_seq1	I19065_12_seq1	761	686	1088	1079	none	-0.0243902	0.825199	0.0487805	0.658687	-0.0107527	0.917411	0.0537634	0.604126
I19058_4_seq1	I19059_5_seq2	I19067_14_seq1	I19065_12_seq2	738	688	1135	1183	none	-0.0447761	0.604234	0.253731	0.00331241	-0.177419	0.0481935	0.145161	0.105998
I19058_4_seq1	I19059_5_seq2	I19067_14_seq1	I19066_13_seq1	751	688	1061	985	none	0.0425532	0.679923	0.0638298	0.536013	0.00990099	0.920738	0.029703	0.765313
I19058_4_seq1	I19059_5_seq2	I19067_14_seq1	I19066_13_seq2	754	684	1123	1143	none	-0.0103093	0.919126	0.0103093	0.919126	0.04	0.689157	0.06	0.548506
I19058_4_seq1	I19059_5_seq2	I19067_14_seq2	I19065_12_seq1	726	691	1150	1138	none	0.172414	0.0633178	-0.275862	0.00296711	0.213115	0.0185761	-0.213115	0.0185761
I19058_4_seq1	I19059_5_seq2	I19067_14_seq2	I19065_12_seq2	730	694	1111	1146	none	0.182796	0.0779312	0.0107527	0.917411	0.248	0.00555892	0.12	0.179712
I19058_4_seq1	I19059_5_seq2	I19067_14_seq2	I19066_13_seq1	717	692	1126	1041	none	0.243697	0.00785067	-0.243697	0.00785067	0.218045	0.0119161	-0.218045	0.0119161
I19058_4_seq1	I19059_5_seq2	I19067_14_seq2	I19066_13_seq2	719	689	1087	1094	none	0.226415	0.0197488	-0.301887	0.00188285	0.230769	0.00850904	-0.2	0.0225869
I19058_4_seq1	I19059_5_seq2	I19068_16_seq1	I19065_12_seq1	687	626	1141	1061	none	0.0642202	0.502553	-0.0275229	0.773846	0.0721649	0.477244	-0.0309278	0.760668
I19058_4_seq1	I19059_5_seq2	I19068_16_seq1	I19065_12_seq2	664	623	1150	1132	none	-0.00719424	0.932405	0.165468	0.0510767	-0.109375	0.215925	0.078125	0.376759
I19058_4_seq1	I19059_5_seq2	I19068_16_seq1	I19066_13_seq1	682	632	1109	957	none	0.0961538	0.3268	-0.0576923	0.556298	0.0857143	0.379775	-0.0666667	0.494525
I19058_4_seq1	I19059_5_seq2	I19068_16_seq1	I19066_13_seq2	685	630	1126	1073	none	0.029703	0.765313	-0.108911	0.273718	0.0961538	0.3268	-0.0384615	0.694887
I19058_4_seq1	I19059_5_seq2	I19068_16_seq1	I19067_14_seq1	703	637	1046	977	none	0.0714286	0.449692	-0.107143	0.256839	0.0947368	0.355809	-0.115789	0.259077
I19058_4_seq1	I19059_5_seq2	I19068_16_seq1	I19067_14_seq2	672	640	1073	1027	none	-0.130435	0.125458	0.15942	0.0611009	-0.174603	0.0500056	0.142857	0.108809
I19058_4_seq1	I19059_5_seq2	I19068_16_seq2	I19065_12_seq1	688	623	1150	1075	none	0.145833	0.153042	0.104167	0.307434	0.0515464	0.611683	0.0103093	0.919126
I19058_4_seq1	I19059_5_seq2	I19068_16_seq2	I19065_12_seq2	667	618	1106	1076	none	0.0866142	0.329019	0.322835	0.000274591	-0.109375	0.215925	0.125	0.157299
I19058_4_seq1	I19059_5_seq2	I19068_16_seq2	I19066_13_seq1	685	629	1081	927	none	0.227723	0.0221034	0.128713	0.195821	0.0825688	0.388663	-0.00917431	0.923693
I19058_4_seq1	I19059_5_seq2	I19068_16_seq2	I19066_13_seq2	688	629	1097	1042	none	0.225	0.0441713	0.125	0.263552	0.0857143	0.379775	0.00952381	0.922258
I19058_4_seq1	I19059_5_seq2	I19068_16_seq2	I19067_14_seq1	705	632	1064	986	none	0.227723	0.0221034	0.128713	0.195821	0.0625	0.540291	-0.0416667	0.683091
I19058_4_seq1	I19059_5_seq2	I19068_16_seq2	I19067_14_seq2	677	638	1051	997	none	0	1	0.396552	1.94605e-05	-0.180328	0.0463945	0.196721	0.029791
I19058_4_seq2	I19058_4_seq1	I19057_3_seq1	I19057_3_seq2	BAAAA	ABAAA	AABAA	AAABA	introgression	DFO_stat	DFO_Pvalue	DIL_stat	DIL_Pvalue	DFI_stat	DFI_Pvalue	DOL_stat	DOL_Pvalue
I19058_4_seq2	I19058_4_seq1	I19060_6_seq1	I19065_12_seq1	576	643	1429	1397	none	0.0791367	0.350816	-0.00719424	0.932405	0.171717	0.0875317	0.0505051	0.615303
I19058_4_seq2	I19058_4_seq1	I19060_6_seq1	I19065_12_seq2	579	624	1412	1412	none	0.298013	0.000250207	-0.0596026	0.463919	0.316667	0.000522575	-0.133333	0.144127
I19058_4_seq2	I19058_4_seq1	I19060_6_seq1	I19066_13_seq1	604	644	1406	1279	none	0.112782	0.193373	-0.0526316	0.543866	0.134615	0.169811	-0.0769231	0.432768
I19058_4_seq2	I19058_4_seq1	I19060_6_seq1	I19066_13_seq2	598	650	1416	1397	none	-0.008	0.92873	0.04	0.654721	0.0188679	0.845975	0.0754717	0.437142
I19058_4_seq2	I19058_4_seq1	I19060_6_seq1	I19067_14_seq1	609	662	1378	1331	none	0.0697674	0.428124	-0.0387597	0.659774	0.148936	0.148742	0	1
I19058_4_seq2	I19058_4_seq1	I19060_6_seq1	I19067_14_seq2	608	634	1423	1361	none	0.255172	0.00212144	-0.172414	0.0378813	0.305785	0.000769228	-0.206612	0.0230426
I19058_4_seq2	I19058_4_seq1	I19060_6_seq1	I19068_16_seq1	584	629	1325	1354	none	0.09375	0.288844	-0.078125	0.376759	0.23913	0.0218101	0	1
I19058_4_seq2	I19058_4_seq1	I19060_6_seq1	I19068_16_seq2	570	630	1317	1320	none	-0.0827068	0.340174	-0.142857	0.0994535	0.113402	0.264045	0.0309278	0.760668
I19058_4_seq2	I19058_4_seq1	I19060_6_seq2	I19065_12_seq1	571	621	1382	1360	none	-0.0718954	0.373843	0.137255	0.0895551	-0.047619	0.59298	0.206349	0.0205439
I19058_4_seq2	I19058_4_seq1	I19060_6_seq2	I19065_12_seq2	577	626	1356	1369	none	0.193277	0.0349958	0.109244	0.233376	-0.05	0.583882	-0.133333	0.144127
I19058_4_seq2	I19058_4_seq1	I19060_6_seq2	I19066_13_seq1	603	621	1365	1256	none	-0.0588235	0.492717	0.132353	0.122713	-0.0625	0.4795	0.140625	0.111612
I19058_4_seq2	I19058_4_seq1	I19060_6_seq2	I19066_13_seq2	593	627	1352	1343	none	-0.182482	0.032688	0.19708	0.0210679	-0.164179	0.0573662	0.223881	0.00955293
I19058_4_seq2	I19058_4_seq1	I19060_6_seq2	I19067_14_seq1	604	638	1361	1327	none	-0.0872483	0.286875	0.127517	0.11958	-0.0819672	0.365276	0.180328	0.0463945
I19058_4_seq2	I19058_4_seq1	I19060_6_seq2	I19067_14_seq2	607	636	1378	1340	none	0.148148	0.123658	0.0185185	0.84739	-0.0833333	0.36131	-0.2	0.0284597
I19058_4_seq2	I19058_4_seq1	I19060_6_seq2	I19068_16_seq1	579	605	1312	1349	none	-0.0738255	0.367506	0.0738255	0.367506	0	1	0.180328	0.0463945
I19058_4_seq2	I19058_4_seq1	I19060_6_seq2	I19068_16_seq2	568	610	1266	1282	none	-0.25	0.00467773	0.03125	0.723674	-0.101695	0.269294	0.20339	0.0271483
I19058_4_seq2	I19058_4_seq1	I19061_7_seq1	I19065_12_seq1	578	610	1556	1395	none	-0.208333	0.0124193	0.180556	0.0302603	-0.162393	0.0789944	0.316239	0.000624714
I19058_4_seq2	I19058_4_seq1	I19061_7_seq1	I19065_12_seq2	580	609	1528	1386	none	0.130435	0.161886	0.165217	0.0764345	-0.15	0.100348	-0.116667	0.201243
I19058_4_seq2	I19058_4_seq1	I19061_7_seq1	I19066_13_seq1	606	609	1492	1249	none	-0.184615	0.0352966	0.2	0.0225869	-0.2	0.0284597	0.216667	0.0176221
I19058_4_seq2	I19058_4_seq1	I19061_7_seq1	I19066_13_seq2	598	609	1488	1347	none	-0.253731	0.00331241	0.238806	0.00570313	-0.24031	0.00634501	0.271318	0.00205906
I19058_4_seq2	I19058_4_seq1	I19061_7_seq1	I19067_14_seq1	612	623	1516	1339	none	-0.172414	0.0378813	0.158621	0.0561273	-0.165217	0.0764345	0.252174	0.00684559
I19058_4_seq2	I19058_4_seq1	I19061_7_seq1	I19067_14_seq2	610	618	1542	1367	none	0.0442478	0.638098	0.0442478	0.638098	-0.176471	0.054221	-0.176471	0.054221
I19058_4_seq2	I19058_4_seq1	I19061_7_seq1	I19068_16_seq1	582	591	1428	1315	none	-0.238095	0.00389242	0.0884354	0.28362	-0.122807	0.189783	0.298246	0.00145059
I19058_4_seq2	I19058_4_seq1	I19061_7_seq1	I19068_16_seq2	567	590	1400	1284	none	-0.296552	0.000355681	0.0482759	0.561026	-0.210084	0.0219203	0.210084	0.0219203
I19058_4_seq2	I19058_4_seq1	I19061_7_seq2	I19065_12_seq1	579	632	1464	1398	none	0.0322581	0.719438	0.0322581	0.719438	0.120879	0.248864	0.120879	0.248864
I19058_4_seq2	I19058_4_seq1	I19061_7_seq2	I19065_12_seq2	583	606	1431	1392	none	0.311258	0.000130875	-0.0331126	0.684086	0.338983	0.000231141	-0.101695	0.269294
I19058_4_seq2	I19058_4_seq1	I19061_7_seq2	I19066_13_seq1	609	631	1413	1264	none	0.0743802	0.413253	-0.00826446	0.927565	0.139785	0.177646	0.0322581	0.755736
I19058_4_seq2	I19058_4_seq1	I19061_7_seq2	I19066_13_seq2	601	632	1423	1386	none	-0.00826446	0.927565	0.0413223	0.649436	0.0392157	0.692061	0.0980392	0.322102
I19058_4_seq2	I19058_4_seq1	I19061_7_seq2	I19067_14_seq1	613	645	1445	1368	none	0.0542636	0.537686	-0.0387597	0.659774	0.155556	0.140017	0.0222222	0.833029
I19058_4_seq2	I19058_4_seq1	I19061_7_seq2	I19067_14_seq2	614	617	1442	1367	none	0.246575	0.00288831	-0.164384	0.0470051	0.344828	0.000204084	-0.172414	0.0633178
I19058_4_seq2	I19058_4_seq1	I19061_7_seq2	I19068_16_seq1	581	613	1361	1346	none	-0.0534351	0.540807	-0.129771	0.137465	0.155556	0.140017	0.0444444	0.67329
I19058_4_seq2	I19058_4_seq1	I19061_7_seq2	I19068_16_seq2	571	609	1322	1293	none	-0.111111	0.212317	-0.15873	0.0747914	0.11828	0.254017	0.0537634	0.604126
I19058_4_seq2	I19058_4_seq1	I19062_8_seq1	I19065_12_seq1	570	622	1534	1421	none	-0.060241	0.43766	0.13253	0.0877234	-0.0677966	0.461451	0.20339	0.0271483
I19058_4_seq2	I19058_4_seq1	I19062_8_seq1	I19065_12_seq2	575	629	1477	1378	none	0.170732	0.0582906	0.170732	0.0582906	-0.132743	0.158221	-0.132743	0.158221
I19058_4_seq2	I19058_4_seq1	I19062_8_seq1	I19066_13_seq1	596	622	1455	1249	none	-0.0588235	0.466854	0.124183	0.124524	-0.104	0.244929	0.12	0.179712
I19058_4_seq2	I19058_4_seq1	I19062_8_seq1	I19066_13_seq2	592	629	1477	1373	none	-0.152778	0.066753	0.208333	0.0124193	-0.193548	0.0311412	0.225806	0.011921
I19058_4_seq2	I19058_4_seq1	I19062_8_seq1	I19067_14_seq1	603	642	1467	1355	none	-0.0700637	0.38	0.171975	0.0311748	-0.125	0.185877	0.214286	0.0233422
I19058_4_seq2	I19058_4_seq1	I19062_8_seq1	I19067_14_seq2	601	639	1511	1376	none	0.114754	0.204976	0.0491803	0.586982	-0.137931	0.137395	-0.206897	0.0258576
I19058_4_seq2	I19058_4_seq1	I19062_8_seq1	I19068_16_seq1	577	606	1396	1329	none	-0.106667	0.191418	0.0933333	0.252999	-0.0608696	0.513915	0.2	0.031972
I19058_4_seq2	I19058_4_seq1	I19062_8_seq1	I19068_16_seq2	562	610	1373	1291	none	-0.258741	0.00197414	0.0629371	0.45168	-0.189655	0.0410872	0.206897	0.0258576
I19058_4_seq2	I19058_4_seq1	I19062_8_seq2	I19065_12_seq1	574	643	1481	1409	none	0.117647	0.170067	0.176471	0.0395918	-0.0212766	0.836569	0.0638298	0.536013
I19058_4_seq2	I19058_4_seq1	I19062_8_seq2	I19065_12_seq2	579	619	1454	1393	none	0.300613	0.000124052	0.128834	0.100001	0.2	0.0284597	-0.0333333	0.715001
I19058_4_seq2	I19058_4_seq1	I19062_8_seq2	I19066_13_seq1	600	643	1447	1272	none	0.173554	0.0562504	0.190083	0.0365362	-0.0505051	0.615303	-0.030303	0.763025
I19058_4_seq2	I19058_4_seq1	I19062_8_seq2	I19066_13_seq2	594	644	1440	1375	none	0.0615385	0.4829	0.261538	0.00286375	-0.102804	0.287596	0.140187	0.147029
I19058_4_seq2	I19058_4_seq1	I19062_8_seq2	I19067_14_seq1	605	659	1416	1334	none	0.114504	0.190008	0.206107	0.0183242	-0.0107527	0.917411	0.11828	0.254017
I19058_4_seq2	I19058_4_seq1	I19062_8_seq2	I19067_14_seq2	603	632	1458	1348	none	0.278912	0.00072059	0.0340136	0.680051	0.173554	0.0562504	-0.123967	0.172682
I19058_4_seq2	I19058_4_seq1	I19062_8_seq2	I19068_16_seq1	583	629	1357	1338	none	0.109244	0.233376	0.109244	0.233376	0.011236	0.915583	0.011236	0.915583
I19058_4_seq2	I19058_4_seq1	I19062_8_seq2	I19068_16_seq2	569	623	1335	1294	none	-0.0687023	0.431672	0.0687023	0.431672	-0.0505051	0.615303	0.131313	0.191366
I19058_4_seq2	I19058_4_seq1	I19064_11_seq1	I19060_6_seq1	589	645	1146	1219	none	-0.0333333	0.715001	0.0833333	0.36131	0.00952381	0.922258	0.142857	0.143235
I19058_4_seq2	I19058_4_seq1	I19064_11_seq1	I19060_6_seq2	584	617	1179	1243	none	0.125828	0.122057	-0.0993377	0.222206	0.2	0.0201368	-0.0518519	0.546865
I19058_4_seq2	I19058_4_seq1	I19064_11_seq1	I19061_7_seq1	590	609	1172	1385	none	0.236111	0.00460653	-0.166667	0.0455003	0.291339	0.00102629	-0.165354	0.0623992
I19058_4_seq2	I19058_4_seq1	I19064_11_seq1	I19061_7_seq2	589	633	1228	1341	none	0.0510949	0.549806	0.0510949	0.549806	0.0784314	0.428292	0.0784314	0.428292
I19058_4_seq2	I19058_4_seq1	I19064_11_seq1	I19062_8_seq1	587	625	1181	1331	none	0.140741	0.101995	-0.125926	0.143433	0.235772	0.00892688	-0.0569106	0.52793
I19058_4_seq2	I19058_4_seq1	I19064_11_seq1	I19062_8_seq2	590	649	1183	1299	none	-0.0873786	0.375189	-0.165049	0.0939225	0.0505051	0.615303	-0.030303	0.763025
I19058_4_seq2	I19058_4_seq1	I19064_11_seq1	I19065_12_seq1	570	639	1231	1280	none	0.0754717	0.437142	0.0377358	0.697635	0.0833333	0.414216	0.0416667	0.683091
I19058_4_seq2	I19058_4_seq1	I19064_11_seq1	I19065_12_seq2	571	610	1232	1322	none	0.281046	0.0005083	0.00653595	0.935565	0.264	0.00316122	-0.072	0.420829
I19058_4_seq2	I19058_4_seq1	I19064_11_seq1	I19066_13_seq1	590	641	1181	1146	none	0.16	0.109599	0.06	0.548506	0.0196078	0.843022	-0.0784314	0.428292
I19058_4_seq2	I19058_4_seq1	I19064_11_seq1	I19066_13_seq2	587	640	1227	1297	none	-0.0265487	0.777778	0.132743	0.158221	-0.00934579	0.922986	0.158879	0.100289
I19058_4_seq2	I19058_4_seq1	I19064_11_seq1	I19067_14_seq1	598	655	1195	1233	none	0.0654206	0.498586	0.046729	0.628834	0.0833333	0.414216	0.0625	0.540291
I19058_4_seq2	I19058_4_seq1	I19064_11_seq1	I19067_14_seq2	598	626	1244	1282	none	0.255474	0.00278748	-0.0948905	0.266713	0.258065	0.00405714	-0.129032	0.150763
I19058_4_seq2	I19058_4_seq1	I19064_11_seq1	I19068_16_seq1	573	628	1157	1285	none	0.107143	0.256839	0	1	0.0736842	0.472643	-0.0526316	0.607959
I19058_4_seq2	I19058_4_seq1	I19064_11_seq1	I19068_16_seq2	564	622	1146	1252	none	-0.0983607	0.277289	-0.0983607	0.277289	0.0588235	0.552453	0.0588235	0.552453
I19058_4_seq2	I19058_4_seq1	I19064_11_seq2	I19060_6_seq1	590	624	1200	1262	none	-0.251701	0.00227543	0.197279	0.0167623	-0.241935	0.00705833	0.290323	0.00122542
I19058_4_seq2	I19058_4_seq1	I19064_11_seq2	I19060_6_seq2	586	623	1144	1200	none	-0.137615	0.150792	0.0458716	0.632	-0.238095	0.00752632	-0.0793651	0.372998
I19058_4_seq2	I19058_4_seq1	I19064_11_seq2	I19061_7_seq1	593	609	1179	1390	none	-0.0545455	0.567269	0	1	-0.213115	0.0185761	-0.163934	0.070185
I19058_4_seq2	I19058_4_seq1	I19064_11_seq2	I19061_7_seq2	596	605	1204	1314	none	-0.232877	0.00489505	0.219178	0.00808884	-0.206612	0.0230426	0.338843	0.000193563
I19058_4_seq2	I19058_4_seq1	I19064_11_seq2	I19062_8_seq1	587	630	1172	1315	none	-0.121495	0.208841	0.0280374	0.7718	-0.260504	0.00448645	-0.12605	0.169117
I19058_4_seq2	I19058_4_seq1	I19064_11_seq2	I19062_8_seq2	592	622	1167	1272	none	-0.308824	0.000316423	0.0147059	0.863832	-0.154472	0.0866808	0.203252	0.0241852
I19058_4_seq2	I19058_4_seq1	I19064_11_seq2	I19065_12_seq1	571	614	1249	1286	none	-0.181102	0.0412588	0.165354	0.0623992	-0.128205	0.165518	0.247863	0.00733913
I19058_4_seq2	I19058_4_seq1	I19064_11_seq2	I19065_12_seq2	574	617	1196	1259	none	0.106796	0.278426	0.184466	0.0611892	-0.182609	0.0501995	-0.113043	0.225414
I19058_4_seq2	I19058_4_seq1	I19064_11_seq2	I19066_13_seq1	595	615	1200	1149	none	-0.145161	0.105998	0.193548	0.0311412	-0.157025	0.0841187	0.190083	0.0365362
I19058_4_seq2	I19058_4_seq1	I19064_11_seq2	I19066_13_seq2	590	621	1151	1206	none	-0.3	0.001015	0.266667	0.003487	-0.268293	0.00292502	0.284553	0.00160035
I19058_4_seq2	I19058_4_seq1	I19064_11_seq2	I19067_14_seq1	604	635	1229	1264	none	-0.191176	0.0257819	0.161765	0.0592297	-0.181818	0.0565303	0.254545	0.00759201
I19058_4_seq2	I19058_4_seq1	I19064_11_seq2	I19067_14_seq2	603	630	1233	1264	none	0	1	0.0408163	0.686168	-0.20354	0.0304906	-0.168142	0.0738778
I19058_4_seq2	I19058_4_seq1	I19064_11_seq2	I19068_16_seq1	576	599	1177	1277	none	-0.138686	0.10453	0.182482	0.032688	-0.145299	0.116032	0.230769	0.0125549
I19058_4_seq2	I19058_4_seq1	I19064_11_seq2	I19068_16_seq2	567	604	1156	1229	none	-0.370968	3.61311e-05	0.0806452	0.369171	-0.256637	0.00637021	0.238938	0.0110869
I19058_4_seq2	I19058_4_seq1	I19066_13_seq1	I19065_12_seq1	585	642	1037	1120	none	-0.0697674	0.517634	0.0930233	0.388323	-0.0444444	0.67329	0.111111	0.291841
I19058_4_seq2	I19058_4_seq1	I19066_13_seq1	I19065_12_seq2	587	615	1014	1125	none	0.209302	0.0174438	0.00775194	0.929841	0.196581	0.0334741	-0.025641	0.781511
I19058_4_seq2	I19058_4_seq1	I19066_13_seq2	I19065_12_seq1	585	644	1151	1143	none	0.125	0.263552	-0.075	0.502335	0.258427	0.014769	0.0786517	0.458088
I19058_4_seq2	I19058_4_seq1	I19066_13_seq2	I19065_12_seq2	583	621	1063	1082	none	0.365854	4.9598e-05	-0.0894309	0.321277	0.350427	0.000150374	-0.128205	0.165518
I19058_4_seq2	I19058_4_seq1	I19067_14_seq1	I19065_12_seq1	593	653	1143	1126	none	0	1	0	1	0.166667	0.12663	0.166667	0.12663
I19058_4_seq2	I19058_4_seq1	I19067_14_seq1	I19065_12_seq2	594	632	1192	1217	none	0.271429	0.00132004	-0.0571429	0.498962	0.309091	0.00118789	-0.109091	0.252559
I19058_4_seq2	I19058_4_seq1	I19067_14_seq1	I19066_13_seq1	617	653	1117	1025	none	0.0873786	0.375189	-0.00970874	0.921509	0.120879	0.248864	0.010989	0.916512
I19058_4_seq2	I19058_4_seq1	I19067_14_seq1	I19066_13_seq2	612	662	1174	1178	none	-0.111111	0.268925	0.0707071	0.481728	-0.0337079	0.750485	0.168539	0.111836
I19058_4_seq2	I19058_4_seq1	I19067_14_seq2	I19065_12_seq1	591	625	1197	1190	none	-0.224806	0.0106705	0.131783	0.134454	-0.0877193	0.348972	0.315789	0.000747034
I19058_4_seq2	I19058_4_seq1	I19067_14_seq2	I19065_12_seq2	595	631	1153	1175	none	0.106383	0.302343	0.12766	0.215825	-0.137615	0.150792	-0.119266	0.213068
I19058_4_seq2	I19058_4_seq1	I19067_14_seq2	I19066_13_seq1	619	627	1176	1089	none	-0.157025	0.0841187	0.157025	0.0841187	-0.0956522	0.305007	0.234783	0.0118103
I19058_4_seq2	I19058_4_seq1	I19067_14_seq2	I19066_13_seq2	611	633	1137	1142	none	-0.339286	0.000329839	0.25	0.00815097	-0.220339	0.0166888	0.338983	0.000231141
I19058_4_seq2	I19058_4_seq1	I19068_16_seq1	I19065_12_seq1	559	622	1202	1114	none	0	1	0.107143	0.256839	-0.0114943	0.914621	0.126437	0.238269
I19058_4_seq2	I19058_4_seq1	I19068_16_seq1	I19065_12_seq2	565	595	1221	1176	none	0.205674	0.0145964	0.0070922	0.932885	0.238938	0.0110869	-0.00884956	0.925052
I19058_4_seq2	I19058_4_seq1	I19068_16_seq1	I19066_13_seq1	588	625	1166	998	none	0.0458716	0.632	0.0642202	0.502553	-0.010989	0.916512	0.010989	0.916512
I19058_4_seq2	I19058_4_seq1	I19068_16_seq1	I19066_13_seq2	581	625	1189	1120	none	-0.130435	0.161886	0.113043	0.225414	-0.0909091	0.365712	0.191919	0.0561884
I19058_4_seq2	I19058_4_seq1	I19068_16_seq1	I19067_14_seq1	592	636	1107	1037	none	-0.0163934	0.856311	0.0819672	0.365276	0	1	0.139535	0.195668
I19058_4_seq2	I19058_4_seq1	I19068_16_seq1	I19067_14_seq2	592	606	1143	1079	none	0.166667	0.0455003	-0.0833333	0.317311	0.238938	0.0110869	-0.079646	0.397191
I19058_4_seq2	I19058_4_seq1	I19068_16_seq2	I19065_12_seq1	552	618	1190	1126	none	0.12381	0.204559	0.0857143	0.379775	0.120879	0.248864	0.0769231	0.463071
I19058_4_seq2	I19058_4_seq1	I19068_16_seq2	I19065_12_seq2	553	599	1146	1110	none	0.419355	3.01584e-06	0.016129	0.857462	0.297297	0.00173489	-0.153153	0.106621
I19058_4_seq2	I19058_4_seq1	I19068_16_seq2	I19066_13_seq1	579	620	1121	971	none	0.233645	0.0156558	0.102804	0.287596	0.115789	0.259077	-0.0315789	0.758239
I19058_4_seq2	I19058_4_seq1	I19068_16_seq2	I19066_13_seq2	574	626	1130	1079	none	0.0697674	0.517634	0.232558	0.0310325	-0.0105263	0.918282	0.136842	0.182279
I19058_4_seq2	I19058_4_seq1	I19068_16_seq2	I19067_14_seq1	580	637	1099	1040	none	0.188679	0.0520679	0.150943	0.120171	0.0930233	0.388323	0.0465116	0.666228
I19058_4_seq2	I19058_4_seq1	I19068_16_seq2	I19067_14_seq2	582	611	1092	1040	none	0.413793	8.32356e-06	-0.0172414	0.852684	0.28972	0.00272755	-0.17757	0.0662395
I19058_4_seq2	I19059_5_seq1	I19057_3_seq1	I19057_3_seq2	BAAAA	ABAAA	AABAA	AAABA	introgression	DFO_stat	DFO_Pvalue	DIL_stat	DIL_Pvalue	DFI_stat	DFI_Pvalue	DOL_stat	DOL_Pvalue
I19058_4_seq2	I19059_5_seq1	I19060_6_seq1	I19065_12_seq1	685	717	1379	1335	none	0.0746269	0.38766	-0.0298507	0.729683	0.171171	0.0713254	0.045045	0.635087
I19058_4_seq2	I19059_5_seq1	I19060_6_seq1	I19065_12_seq2	685	691	1361	1359	none	0.333333	4.45571e-05	-0.0533333	0.513629	0.304965	0.000293179	-0.106383	0.206507
I19058_4_seq2	I19059_5_seq1	I19060_6_seq1	I19066_13_seq1	696	714	1354	1230	none	0.088	0.325179	-0.008	0.92873	0.168142	0.0738778	0.0619469	0.510214
I19058_4_seq2	I19059_5_seq1	I19060_6_seq1	I19066_13_seq2	694	711	1365	1335	none	-0.008	0.92873	0.04	0.654721	0.12069	0.193646	0.172414	0.0633178
I19058_4_seq2	I19059_5_seq1	I19060_6_seq1	I19067_14_seq1	712	712	1325	1257	none	0.107692	0.219492	-0.0769231	0.380455	0.189655	0.0410872	-0.0172414	0.852684
I19058_4_seq2	I19059_5_seq1	I19060_6_seq1	I19067_14_seq2	709	699	1364	1306	none	0.211268	0.0118176	-0.140845	0.0932763	0.288889	0.000789113	-0.0814815	0.343777
I19058_4_seq2	I19059_5_seq1	I19060_6_seq1	I19068_16_seq1	650	661	1273	1283	none	0.0689655	0.457614	0.0172414	0.852684	0.176471	0.0747059	0.117647	0.234764
I19058_4_seq2	I19059_5_seq1	I19060_6_seq1	I19068_16_seq2	640	658	1266	1275	none	-0.100775	0.252381	-0.100775	0.252381	0.121495	0.208841	0.121495	0.208841
I19058_4_seq2	I19059_5_seq1	I19060_6_seq2	I19065_12_seq1	680	696	1329	1300	none	-0.062069	0.454817	0.131034	0.114597	0	1	0.205882	0.0163512
I19058_4_seq2	I19059_5_seq1	I19060_6_seq2	I19065_12_seq2	679	692	1301	1318	none	0.245902	0.00660615	0.114754	0.204976	0.00689655	0.933815	-0.103448	0.212881
I19058_4_seq2	I19059_5_seq1	I19060_6_seq2	I19066_13_seq1	693	692	1314	1208	none	-0.0697674	0.428124	0.193798	0.027727	-0.00729927	0.931915	0.240876	0.00481165
I19058_4_seq2	I19059_5_seq1	I19060_6_seq2	I19066_13_seq2	689	689	1302	1282	none	-0.164179	0.0573662	0.208955	0.0155704	-0.0422535	0.614607	0.309859	0.000222149
I19058_4_seq2	I19059_5_seq1	I19060_6_seq2	I19067_14_seq1	708	690	1310	1255	none	-0.0340136	0.680051	0.115646	0.160875	0.0070922	0.932885	0.163121	0.0527515
I19058_4_seq2	I19059_5_seq1	I19060_6_seq2	I19067_14_seq2	705	700	1320	1286	none	0.109091	0.252559	0.0727273	0.445601	-0.0434783	0.609523	-0.0724638	0.394627
I19058_4_seq2	I19059_5_seq1	I19060_6_seq2	I19068_16_seq1	642	638	1263	1275	none	-0.0869565	0.307014	0.173913	0.0410509	-0.0298507	0.729683	0.238806	0.00570313
I19058_4_seq2	I19059_5_seq1	I19060_6_seq2	I19068_16_seq2	637	639	1222	1240	none	-0.253968	0.00436112	0.0793651	0.372998	-0.0615385	0.4829	0.261538	0.00286375
I19058_4_seq2	I19059_5_seq1	I19061_7_seq1	I19065_12_seq1	711	686	1510	1348	none	-0.136986	0.0978815	0.164384	0.0470051	-0.0687023	0.431672	0.267176	0.00222846
I19058_4_seq2	I19059_5_seq1	I19061_7_seq1	I19065_12_seq2	710	686	1478	1344	none	0.160714	0.088973	0.196429	0.0376353	-0.080292	0.347324	-0.0510949	0.549806
I19058_4_seq2	I19059_5_seq1	I19061_7_seq1	I19066_13_seq1	723	684	1452	1215	none	-0.190476	0.0325094	0.238095	0.00752632	-0.107692	0.219492	0.307692	0.000451095
I19058_4_seq2	I19059_5_seq1	I19061_7_seq1	I19066_13_seq2	719	680	1448	1300	none	-0.268657	0.00187134	0.268657	0.00187134	-0.140741	0.101995	0.392593	5.07862e-06
I19058_4_seq2	I19059_5_seq1	I19061_7_seq1	I19067_14_seq1	739	681	1465	1279	none	-0.142857	0.0832645	0.170068	0.039211	-0.0746269	0.38766	0.268657	0.00187134
I19058_4_seq2	I19059_5_seq1	I19061_7_seq1	I19067_14_seq2	735	692	1486	1319	none	-0.0275229	0.773846	0.119266	0.213068	-0.129771	0.137465	-0.00763359	0.930377
I19058_4_seq2	I19059_5_seq1	I19061_7_seq1	I19068_16_seq1	670	629	1383	1272	none	-0.222222	0.00766076	0.222222	0.00766076	-0.15625	0.0770999	0.34375	0.000100622
I19058_4_seq2	I19059_5_seq1	I19061_7_seq1	I19068_16_seq2	664	630	1356	1254	none	-0.328571	0.000101195	0.114286	0.176296	-0.174603	0.0500056	0.31746	0.000365966
I19058_4_seq2	I19059_5_seq1	I19061_7_seq2	I19065_12_seq1	713	712	1416	1352	none	0.131783	0.134454	0.00775194	0.929841	0.288462	0.00326372	0.134615	0.169811
I19058_4_seq2	I19059_5_seq1	I19061_7_seq2	I19065_12_seq2	713	689	1380	1351	none	0.369863	7.85598e-06	-0.0273973	0.740612	0.393939	6.01052e-06	-0.0454545	0.601508
I19058_4_seq2	I19059_5_seq1	I19061_7_seq2	I19066_13_seq1	724	712	1373	1230	none	0.111111	0.229421	0.00854701	0.92634	0.287129	0.00390659	0.168317	0.0907293
I19058_4_seq2	I19059_5_seq1	I19061_7_seq2	I19066_13_seq2	720	709	1378	1334	none	0.00854701	0.92634	0.0598291	0.517535	0.207547	0.0326119	0.264151	0.00653608
I19058_4_seq2	I19059_5_seq1	I19061_7_seq2	I19067_14_seq1	740	710	1393	1307	none	0.11811	0.183178	-0.0393701	0.657275	0.288462	0.00326372	0.0961538	0.3268
I19058_4_seq2	I19059_5_seq1	I19061_7_seq2	I19067_14_seq2	737	698	1387	1321	none	0.231884	0.00644924	-0.130435	0.125458	0.382114	2.25673e-05	-0.0243902	0.786775
I19058_4_seq2	I19059_5_seq1	I19061_7_seq2	I19068_16_seq1	670	656	1318	1303	none	-0.00763359	0.930377	-0.00763359	0.930377	0.145631	0.139409	0.145631	0.139409
I19058_4_seq2	I19059_5_seq1	I19061_7_seq2	I19068_16_seq2	667	655	1282	1266	none	-0.12605	0.169117	-0.109244	0.233376	0.163265	0.106042	0.183673	0.0690222
I19058_4_seq2	I19059_5_seq1	I19062_8_seq1	I19065_12_seq1	689	670	1476	1356	none	-0.10303	0.185686	0.0909091	0.242908	-0.0277778	0.738883	0.194444	0.0196307
I19058_4_seq2	I19059_5_seq1	I19062_8_seq1	I19065_12_seq2	687	667	1419	1334	none	0.181102	0.0412588	0.11811	0.183178	-0.04	0.624206	-0.0933333	0.252999
I19058_4_seq2	I19059_5_seq1	I19062_8_seq1	I19066_13_seq1	699	666	1400	1198	none	-0.12	0.141645	0.133333	0.10247	-0.0482759	0.561026	0.213793	0.0100411
I19058_4_seq2	I19059_5_seq1	I19062_8_seq1	I19066_13_seq2	699	664	1422	1308	none	-0.189189	0.0213585	0.175676	0.0325828	-0.0821918	0.320648	0.287671	0.000509057
I19058_4_seq2	I19059_5_seq1	I19062_8_seq1	I19067_14_seq1	716	663	1415	1290	none	-0.0674847	0.388915	0.0920245	0.240038	-0.0201342	0.805861	0.154362	0.0595334
I19058_4_seq2	I19059_5_seq1	I19062_8_seq1	I19067_14_seq2	711	672	1448	1329	none	0.0232558	0.791676	0.0387597	0.659774	-0.0675676	0.41108	-0.0540541	0.510798
I19058_4_seq2	I19059_5_seq1	I19062_8_seq1	I19068_16_seq1	661	630	1343	1257	none	-0.166667	0.0455003	0.180556	0.0302603	-0.0724638	0.394627	0.289855	0.000661577
I19058_4_seq2	I19059_5_seq1	I19062_8_seq1	I19068_16_seq2	654	630	1322	1249	none	-0.30137	0.00027109	0.0821918	0.320648	-0.132353	0.122713	0.279412	0.00112013
I19058_4_seq2	I19059_5_seq1	I19062_8_seq2	I19065_12_seq1	694	698	1427	1346	none	0.15942	0.0611009	0.0144928	0.864813	0.224138	0.0157768	0.0517241	0.577469
I19058_4_seq2	I19059_5_seq1	I19062_8_seq2	I19065_12_seq2	691	670	1397	1347	none	0.396226	5.84634e-07	0.00628931	0.93679	0.337838	3.95702e-05	-0.0810811	0.32394
I19058_4_seq2	I19059_5_seq1	I19062_8_seq2	I19066_13_seq1	705	695	1392	1224	none	0.190083	0.0365362	0.0909091	0.317311	0.206897	0.0258576	0.103448	0.265205
I19058_4_seq2	I19059_5_seq1	I19062_8_seq2	I19066_13_seq2	704	694	1380	1308	none	0.114754	0.204976	0.131148	0.147457	0.152542	0.0975125	0.169492	0.0655997
I19058_4_seq2	I19059_5_seq1	I19062_8_seq2	I19067_14_seq1	720	694	1356	1262	none	0.21875	0.0133283	0	1	0.233333	0.0105871	0	1
I19058_4_seq2	I19059_5_seq1	I19062_8_seq2	I19067_14_seq2	715	679	1392	1301	none	0.291667	0.000465258	-0.0694444	0.404657	0.300699	0.000323346	-0.0629371	0.45168
I19058_4_seq2	I19059_5_seq1	I19062_8_seq2	I19068_16_seq1	666	660	1299	1265	none	0.12069	0.193646	0.12069	0.193646	0.155963	0.10346	0.155963	0.10346
I19058_4_seq2	I19059_5_seq1	I19062_8_seq2	I19068_16_seq2	661	658	1278	1250	none	-0.0491803	0.586982	0	1	0.119266	0.213068	0.174312	0.0687788
I19058_4_seq2	I19059_5_seq1	I19064_11_seq1	I19060_6_seq1	684	684	1090	1172	none	0	1	-0.0666667	0.465209	0.258621	0.00534568	0.189655	0.0410872
I19058_4_seq2	I19059_5_seq1	I19064_11_seq1	I19060_6_seq2	678	663	1127	1196	none	0.142857	0.0909689	-0.242857	0.0040592	0.366197	1.27856e-05	-0.0140845	0.866712
I19058_4_seq2	I19059_5_seq1	I19064_11_seq1	I19061_7_seq1	707	653	1125	1331	none	0.230769	0.00578724	-0.286713	0.00060672	0.42446	5.60611e-07	-0.107914	0.203272
I19058_4_seq2	I19059_5_seq1	I19064_11_seq1	I19061_7_seq2	707	684	1183	1291	none	0.00763359	0.930377	-0.0687023	0.431672	0.272727	0.00423123	0.181818	0.0565303
I19058_4_seq2	I19059_5_seq1	I19064_11_seq1	I19062_8_seq1	693	655	1126	1277	none	0.203008	0.019222	-0.218045	0.0119161	0.402778	1.34266e-06	0.0138889	0.867632
I19058_4_seq2	I19059_5_seq1	I19064_11_seq1	I19062_8_seq2	697	686	1133	1254	none	-0.115385	0.239317	-0.153846	0.116664	0.258621	0.00534568	0.224138	0.0157768
I19058_4_seq2	I19059_5_seq1	I19064_11_seq1	I19065_12_seq1	691	686	1185	1227	none	0.100917	0.292062	-0.174312	0.0687788	0.339286	0.000329839	0.0714286	0.449692
I19058_4_seq2	I19059_5_seq1	I19064_11_seq1	I19065_12_seq2	688	657	1182	1276	none	0.360544	1.23471e-05	-0.129252	0.117093	0.410959	6.84765e-07	-0.0821918	0.320648
I19058_4_seq2	I19059_5_seq1	I19064_11_seq1	I19066_13_seq1	696	684	1139	1107	none	0.16	0.109599	-0.08	0.423711	0.298246	0.00145059	0.0877193	0.348972
I19058_4_seq2	I19059_5_seq1	I19064_11_seq1	I19066_13_seq2	695	686	1178	1244	none	0.00970874	0.921509	-0.0485437	0.62225	0.238938	0.0110869	0.185841	0.0482099
I19058_4_seq2	I19059_5_seq1	I19064_11_seq1	I19067_14_seq1	714	682	1147	1170	none	0.148148	0.123658	-0.12963	0.177932	0.310345	0.000830225	0.0517241	0.577469
I19058_4_seq2	I19059_5_seq1	I19064_11_seq1	I19067_14_seq2	708	668	1190	1238	none	0.251908	0.00393628	-0.19084	0.0289431	0.371429	1.10874e-05	-0.0428571	0.61209
I19058_4_seq2	I19059_5_seq1	I19064_11_seq1	I19068_16_seq1	654	648	1113	1225	none	0.0956522	0.305007	-0.026087	0.779668	0.261261	0.00591316	0.135135	0.154523
I19058_4_seq2	I19059_5_seq1	I19064_11_seq1	I19068_16_seq2	648	647	1094	1209	none	-0.105263	0.261054	-0.192982	0.0393518	0.233645	0.0156558	0.140187	0.147029
I19058_4_seq2	I19059_5_seq1	I19064_11_seq2	I19060_6_seq1	687	654	1159	1217	none	-0.253521	0.00251897	0.211268	0.0118176	-0.142857	0.0994535	0.353383	4.5932e-05
I19058_4_seq2	I19059_5_seq1	I19064_11_seq2	I19060_6_seq2	680	655	1104	1152	none	-0.150943	0.120171	0.0377358	0.697635	-0.144928	0.0886592	0	1
I19058_4_seq2	I19059_5_seq1	I19064_11_seq2	I19061_7_seq1	712	646	1141	1336	none	-0.0285714	0.769698	-0.0285714	0.769698	-0.0852713	0.332797	-0.0852713	0.332797
I19058_4_seq2	I19059_5_seq1	I19064_11_seq2	I19061_7_seq2	716	652	1168	1265	none	-0.255474	0.00278748	0.211679	0.0132256	-0.0894309	0.321277	0.430894	1.76301e-06
I19058_4_seq2	I19059_5_seq1	I19064_11_seq2	I19062_8_seq1	694	653	1131	1266	none	-0.0841121	0.384266	0.0841121	0.384266	-0.107914	0.203272	0.0215827	0.799143
I19058_4_seq2	I19059_5_seq1	I19064_11_seq2	I19062_8_seq2	700	658	1127	1227	none	-0.379845	1.60175e-05	0.162791	0.0644655	-0.0962963	0.263199	0.422222	9.30573e-07
I19058_4_seq2	I19059_5_seq1	I19064_11_seq2	I19065_12_seq1	696	652	1205	1223	none	-0.193548	0.0311412	0.145161	0.105998	-0.0307692	0.725721	0.292308	0.000859704
I19058_4_seq2	I19059_5_seq1	I19064_11_seq2	I19065_12_seq2	695	652	1152	1210	none	0.165049	0.0939225	0.184466	0.0611892	-0.0666667	0.438578	-0.0518519	0.546865
I19058_4_seq2	I19059_5_seq1	I19064_11_seq2	I19066_13_seq1	702	650	1160	1099	none	-0.163934	0.070185	0.229508	0.0112447	-0.0534351	0.540807	0.312977	0.00034073
I19058_4_seq2	I19059_5_seq1	I19064_11_seq2	I19066_13_seq2	701	650	1113	1151	none	-0.294118	0.00133455	0.260504	0.00448645	-0.121212	0.163734	0.378788	1.34937e-05
I19058_4_seq2	I19059_5_seq1	I19064_11_seq2	I19067_14_seq1	720	648	1188	1197	none	-0.136691	0.107058	0.151079	0.0748803	-0.0447761	0.604234	0.253731	0.00331241
I19058_4_seq2	I19059_5_seq1	I19064_11_seq2	I19067_14_seq2	716	660	1192	1221	none	-0.04	0.689157	0.1	0.317311	-0.116279	0.186609	-0.00775194	0.929841
I19058_4_seq2	I19059_5_seq1	I19064_11_seq2	I19068_16_seq1	660	615	1139	1209	none	-0.160305	0.0665385	0.29771	0.000655739	-0.126984	0.154044	0.349206	8.86109e-05
I19058_4_seq2	I19059_5_seq1	I19064_11_seq2	I19068_16_seq2	655	616	1118	1187	none	-0.382114	2.25673e-05	0.154472	0.0866808	-0.193277	0.0349958	0.361345	8.08712e-05
I19058_4_seq2	I19059_5_seq1	I19067_14_seq1	I19065_12_seq1	725	711	1083	1071	none	-0.0786517	0.458088	-0.0337079	0.750485	0.142857	0.143235	0.180952	0.0637091
I19058_4_seq2	I19059_5_seq1	I19067_14_seq1	I19065_12_seq2	720	684	1126	1174	none	0.246575	0.00288831	-0.0547945	0.507917	0.276596	0.00102202	-0.035461	0.6737
I19058_4_seq2	I19059_5_seq1	I19067_14_seq1	I19066_13_seq1	735	716	1054	985	none	-0.0208333	0.838256	0.0416667	0.683091	0.106796	0.278426	0.165049	0.0939225
I19058_4_seq2	I19059_5_seq1	I19067_14_seq1	I19066_13_seq2	733	711	1116	1131	none	-0.158879	0.100289	0.046729	0.628834	0.0841121	0.384266	0.28972	0.00272755
I19058_4_seq2	I19059_5_seq1	I19067_14_seq2	I19065_12_seq1	718	696	1150	1124	none	-0.184615	0.0352966	0.0615385	0.4829	0.037594	0.664612	0.278195	0.00133519
I19058_4_seq2	I19059_5_seq1	I19067_14_seq2	I19065_12_seq2	717	697	1113	1136	none	0.196078	0.0476704	0.0588235	0.552453	0.0147059	0.863832	-0.0882353	0.303484
I19058_4_seq2	I19059_5_seq1	I19067_14_seq2	I19066_13_seq1	728	699	1128	1037	none	-0.15	0.100348	0.133333	0.144127	0.00763359	0.930377	0.267176	0.00222846
I19058_4_seq2	I19059_5_seq1	I19067_14_seq2	I19066_13_seq2	726	696	1089	1078	none	-0.275862	0.00296711	0.172414	0.0633178	-0.037594	0.664612	0.353383	4.5932e-05
I19058_4_seq2	I19059_5_seq1	I19068_16_seq1	I19065_12_seq1	651	662	1138	1058	none	0.0350877	0.707932	-0.0350877	0.707932	0.153846	0.116664	0.0769231	0.432768
I19058_4_seq2	I19059_5_seq1	I19068_16_seq1	I19065_12_seq2	649	631	1147	1125	none	0.271429	0.00132004	-0.0857143	0.310494	0.294118	0.000603644	-0.0735294	0.391173
I19058_4_seq2	I19059_5_seq1	I19068_16_seq1	I19066_13_seq1	666	662	1101	958	none	0.0555556	0.563703	0	1	0.12381	0.204559	0.0666667	0.494525
I19058_4_seq2	I19059_5_seq1	I19068_16_seq1	I19066_13_seq2	665	661	1120	1065	none	-0.113208	0.243799	0.0188679	0.845975	0.0566038	0.560047	0.188679	0.0520679
I19058_4_seq2	I19059_5_seq1	I19068_16_seq1	I19067_14_seq1	674	657	1039	973	none	0.0677966	0.461451	-0.0677966	0.461451	0.158879	0.100289	0.00934579	0.922986
I19058_4_seq2	I19059_5_seq1	I19068_16_seq1	I19067_14_seq2	672	641	1065	1034	none	0.148936	0.0769742	-0.134752	0.109579	0.261538	0.00286375	-0.0461538	0.598725
I19058_4_seq2	I19059_5_seq1	I19068_16_seq2	I19065_12_seq1	648	659	1151	1068	none	0.145631	0.139409	0.0291262	0.767537	0.207921	0.0366557	0.0891089	0.370502
I19058_4_seq2	I19059_5_seq1	I19068_16_seq2	I19065_12_seq2	645	633	1109	1070	none	0.460317	2.37817e-07	-0.015873	0.858586	0.333333	0.000153129	-0.131783	0.134454
I19058_4_seq2	I19059_5_seq1	I19068_16_seq2	I19066_13_seq1	666	661	1082	929	none	0.24	0.0163951	0.14	0.161513	0.188119	0.0586817	0.0891089	0.370502
I19058_4_seq2	I19059_5_seq1	I19068_16_seq2	I19066_13_seq2	664	660	1098	1033	none	0.097561	0.376992	0.219512	0.0468374	0.117647	0.234764	0.215686	0.0293819
I19058_4_seq2	I19059_5_seq1	I19068_16_seq2	I19067_14_seq1	672	655	1061	978	none	0.271028	0.00505456	0.102804	0.287596	0.227723	0.0221034	0.049505	0.618823
I19058_4_seq2	I19059_5_seq1	I19068_16_seq2	I19067_14_seq2	669	645	1051	1004	none	0.373913	6.07777e-05	-0.00869565	0.925705	0.283333	0.00191078	-0.0833333	0.36131
I19058_4_seq2	I19059_5_seq2	I19057_3_seq1	I19057_3_seq2	BAAAA	ABAAA	AABAA	AAABA	introgression	DFO_stat	DFO_Pvalue	DIL_stat	DIL_Pvalue	DFI_stat	DFI_Pvalue	DOL_stat	DOL_Pvalue
I19058_4_seq2	I19059_5_seq2	I19060_6_seq1	I19065_12_seq1	647	656	1376	1337	none	0.0149254	0.862829	0.0298507	0.729683	0.125	0.220671	0.145833	0.153042
I19058_4_seq2	I19059_5_seq2	I19060_6_seq1	I19065_12_seq2	653	658	1362	1393	none	0.186992	0.0380942	0.0569106	0.52793	0.16	0.109599	0	1
I19058_4_seq2	I19059_5_seq2	I19060_6_seq1	I19066_13_seq1	663	654	1355	1232	none	0.0413223	0.649436	0.00826446	0.927565	0.0980392	0.322102	0.0588235	0.552453
I19058_4_seq2	I19059_5_seq2	I19060_6_seq1	I19066_13_seq2	659	650	1364	1339	none	-0.0483871	0.590014	0.016129	0.857462	0.0654206	0.498586	0.140187	0.147029
I19058_4_seq2	I19059_5_seq2	I19060_6_seq1	I19067_14_seq1	683	664	1324	1268	none	0.0406504	0.652109	-0.0894309	0.321277	0.142857	0.157299	-0.0204082	0.839893
I19058_4_seq2	I19059_5_seq2	I19060_6_seq1	I19067_14_seq2	677	666	1365	1330	none	0.0175439	0.851412	0.0175439	0.851412	0.0816327	0.41902	0.0816327	0.41902
I19058_4_seq2	I19059_5_seq2	I19060_6_seq1	I19068_16_seq1	619	610	1272	1285	none	0.0344828	0.710347	0.0517241	0.577469	0.115789	0.259077	0.136842	0.182279
I19058_4_seq2	I19059_5_seq2	I19060_6_seq1	I19068_16_seq2	615	606	1266	1274	none	-0.126984	0.154044	-0.142857	0.108809	0.115789	0.259077	0.0947368	0.355809
I19058_4_seq2	I19059_5_seq2	I19060_6_seq2	I19065_12_seq1	647	658	1354	1303	none	0.0756303	0.409355	0.092437	0.313278	0.11828	0.254017	0.139785	0.177646
I19058_4_seq2	I19059_5_seq2	I19060_6_seq2	I19065_12_seq2	652	657	1305	1329	none	0.247863	0.00733913	0.111111	0.229421	0.16	0.109599	0	1
I19058_4_seq2	I19059_5_seq2	I19060_6_seq2	I19066_13_seq1	664	654	1342	1210	none	0.128713	0.195821	0.0693069	0.486099	0.12	0.230139	0.06	0.548506
I19058_4_seq2	I19059_5_seq2	I19060_6_seq2	I19066_13_seq2	659	651	1329	1287	none	0	1	0.0740741	0.441418	0.0666667	0.494525	0.142857	0.143235
I19058_4_seq2	I19059_5_seq2	I19060_6_seq2	I19067_14_seq1	683	663	1335	1265	none	0.113043	0.225414	-0.026087	0.779668	0.145833	0.153042	-0.0208333	0.838256
I19058_4_seq2	I19059_5_seq2	I19060_6_seq2	I19067_14_seq2	677	665	1324	1286	none	0.102804	0.287596	0.102804	0.287596	0.0909091	0.365712	0.0909091	0.365712
I19058_4_seq2	I19059_5_seq2	I19060_6_seq2	I19068_16_seq1	619	611	1291	1279	none	0.0909091	0.340356	0.109091	0.252559	0.0947368	0.355809	0.115789	0.259077
I19058_4_seq2	I19059_5_seq2	I19060_6_seq2	I19068_16_seq2	616	607	1247	1236	none	-0.0769231	0.432768	-0.115385	0.239317	0.139785	0.177646	0.0967742	0.350688
I19058_4_seq2	I19059_5_seq2	I19061_7_seq1	I19065_12_seq1	671	657	1534	1351	none	-0.0406504	0.652109	0.0569106	0.52793	0.0851064	0.409294	0.212766	0.0391276
I19058_4_seq2	I19059_5_seq2	I19061_7_seq1	I19065_12_seq2	677	659	1481	1354	none	0.127273	0.181926	0.109091	0.252559	0.113402	0.264045	0.0927835	0.360816
I19058_4_seq2	I19059_5_seq2	I19061_7_seq1	I19066_13_seq1	686	655	1481	1215	none	-0.029703	0.765313	0.00990099	0.920738	0.06	0.548506	0.1	0.317311
I19058_4_seq2	I19059_5_seq2	I19061_7_seq1	I19066_13_seq2	683	652	1476	1304	none	-0.145455	0.127124	0.0545455	0.567269	0.0196078	0.843022	0.235294	0.0174847
I19058_4_seq2	I19059_5_seq2	I19061_7_seq1	I19067_14_seq1	706	665	1491	1288	none	-0.042735	0.643902	-0.042735	0.643902	0.0851064	0.409294	0.0851064	0.409294
I19058_4_seq2	I19059_5_seq2	I19061_7_seq1	I19067_14_seq2	700	668	1492	1319	none	-0.0566038	0.560047	0.0566038	0.560047	0.0315789	0.758239	0.157895	0.123812
I19058_4_seq2	I19059_5_seq2	I19061_7_seq1	I19068_16_seq1	640	610	1411	1274	none	-0.092437	0.313278	0.0756303	0.409355	-0.0208333	0.838256	0.1875	0.0661926
I19058_4_seq2	I19059_5_seq2	I19061_7_seq1	I19068_16_seq2	638	606	1381	1249	none	-0.2	0.0284597	-0.116667	0.201243	0.0425532	0.679923	0.148936	0.148742
I19058_4_seq2	I19059_5_seq2	I19061_7_seq2	I19065_12_seq1	670	657	1420	1355	none	0.0645161	0.472498	0.0806452	0.369171	0.195402	0.0683653	0.218391	0.0416487
I19058_4_seq2	I19059_5_seq2	I19061_7_seq2	I19065_12_seq2	676	658	1384	1382	none	0.213115	0.0185761	0.0983607	0.277289	0.234043	0.0232606	0.0851064	0.409294
I19058_4_seq2	I19059_5_seq2	I19061_7_seq2	I19066_13_seq1	685	652	1377	1229	none	0.0517241	0.577469	0.0344828	0.710347	0.170213	0.0988869	0.148936	0.148742
I19058_4_seq2	I19059_5_seq2	I19061_7_seq2	I19066_13_seq2	682	651	1382	1338	none	-0.0526316	0.574149	0.0701754	0.453695	0.0947368	0.355809	0.242105	0.0182872
I19058_4_seq2	I19059_5_seq2	I19061_7_seq2	I19067_14_seq1	705	664	1395	1316	none	0.0333333	0.715001	-0.05	0.583882	0.181818	0.0880815	0.0681818	0.522431
I19058_4_seq2	I19059_5_seq2	I19061_7_seq2	I19067_14_seq2	700	668	1393	1345	none	0.0181818	0.848767	0.0363636	0.702918	0.126437	0.238269	0.149425	0.163394
I19058_4_seq2	I19059_5_seq2	I19061_7_seq2	I19068_16_seq1	641	608	1321	1304	none	-0.0542636	0.537686	0.0852713	0.332797	0	1	0.195652	0.0605689
I19058_4_seq2	I19059_5_seq2	I19061_7_seq2	I19068_16_seq2	641	604	1285	1262	none	-0.162393	0.0789944	-0.0940171	0.309177	0.0823529	0.447699	0.176471	0.103742
I19058_4_seq2	I19059_5_seq2	I19062_8_seq1	I19065_12_seq1	650	648	1509	1361	none	0.0597015	0.489506	0.0298507	0.729683	0.11828	0.254017	0.0752688	0.467921
I19058_4_seq2	I19059_5_seq2	I19062_8_seq1	I19065_12_seq2	658	648	1430	1341	none	0.210084	0.0219203	0.092437	0.313278	0.134021	0.186852	-0.0103093	0.919126
I19058_4_seq2	I19059_5_seq2	I19062_8_seq1	I19066_13_seq1	663	642	1436	1200	none	0.0847458	0.357273	0	1	0.08	0.423711	-0.02	0.841481
I19058_4_seq2	I19059_5_seq2	I19062_8_seq1	I19066_13_seq2	663	642	1457	1314	none	0	1	0.0344828	0.710347	0.04	0.689157	0.08	0.423711
I19058_4_seq2	I19059_5_seq2	I19062_8_seq1	I19067_14_seq1	686	654	1447	1300	none	0.102362	0.248679	-0.0393701	0.657275	0.12766	0.215825	-0.0638298	0.536013
I19058_4_seq2	I19059_5_seq2	I19062_8_seq1	I19067_14_seq2	677	656	1460	1330	none	0.0677966	0.461451	0.0508475	0.580712	0.0408163	0.686168	0.0204082	0.839893
I19058_4_seq2	I19059_5_seq2	I19062_8_seq1	I19068_16_seq1	638	614	1375	1259	none	0.0175439	0.851412	0.0701754	0.453695	0.0638298	0.536013	0.12766	0.215825
I19058_4_seq2	I19059_5_seq2	I19062_8_seq1	I19068_16_seq2	632	611	1353	1245	none	-0.12605	0.169117	-0.12605	0.169117	0.0322581	0.755736	0.0322581	0.755736
I19058_4_seq2	I19059_5_seq2	I19062_8_seq2	I19065_12_seq1	654	648	1432	1352	none	0.151515	0.0817228	0.121212	0.163734	0.164835	0.115851	0.120879	0.248864
I19058_4_seq2	I19059_5_seq2	I19062_8_seq2	I19065_12_seq2	659	647	1403	1380	none	0.291339	0.00102629	0.181102	0.0412588	0.163265	0.106042	0.0204082	0.839893
I19058_4_seq2	I19059_5_seq2	I19062_8_seq2	I19066_13_seq1	667	642	1398	1226	none	0.217391	0.0197395	0.130435	0.161886	0.131313	0.191366	0.030303	0.763025
I19058_4_seq2	I19059_5_seq2	I19062_8_seq2	I19066_13_seq2	665	643	1385	1314	none	0.128205	0.165518	0.162393	0.0789944	0.08	0.423711	0.12	0.230139
I19058_4_seq2	I19059_5_seq2	I19062_8_seq2	I19067_14_seq1	687	656	1358	1272	none	0.213675	0.020819	0.042735	0.643902	0.16129	0.119844	-0.0537634	0.604126
I19058_4_seq2	I19059_5_seq2	I19062_8_seq2	I19067_14_seq2	679	658	1397	1326	none	0.178571	0.0587817	0.142857	0.13057	0.0721649	0.477244	0.0309278	0.760668
I19058_4_seq2	I19059_5_seq2	I19062_8_seq2	I19068_16_seq1	642	615	1300	1268	none	0.107143	0.256839	0.214286	0.0233422	0.0549451	0.600179	0.186813	0.0747355
I19058_4_seq2	I19059_5_seq2	I19062_8_seq2	I19068_16_seq2	637	612	1280	1249	none	-0.042735	0.643902	0.00854701	0.92634	0.032967	0.753152	0.0989011	0.345448
I19058_4_seq2	I19059_5_seq2	I19064_11_seq1	I19060_6_seq1	642	629	1097	1172	none	0.0782609	0.401327	-0.0782609	0.401327	0.292929	0.00356134	0.111111	0.268925
I19058_4_seq2	I19059_5_seq2	I19064_11_seq1	I19060_6_seq2	640	628	1133	1222	none	0.0178571	0.850107	-0.160714	0.088973	0.285714	0.00467773	0.0816327	0.41902
I19058_4_seq2	I19059_5_seq2	I19064_11_seq1	I19061_7_seq1	663	632	1131	1359	none	0.147826	0.112908	-0.130435	0.161886	0.333333	0.000911119	0.010101	0.919944
I19058_4_seq2	I19059_5_seq2	I19064_11_seq1	I19061_7_seq2	662	634	1189	1295	none	0.09375	0.288844	-0.109375	0.215925	0.319149	0.00197302	0.0425532	0.679923
I19058_4_seq2	I19059_5_seq2	I19064_11_seq1	I19062_8_seq1	652	632	1132	1310	none	0.04	0.689157	-0.1	0.317311	0.304348	0.00350929	0.152174	0.1444
I19058_4_seq2	I19059_5_seq2	I19064_11_seq1	I19062_8_seq2	654	632	1138	1255	none	-0.0909091	0.365712	-0.212121	0.0348085	0.296703	0.00464943	0.164835	0.115851
I19058_4_seq2	I19059_5_seq2	I19064_11_seq1	I19065_12_seq1	644	637	1188	1230	none	0.0961538	0.3268	-0.0769231	0.432768	0.325843	0.00211214	0.123596	0.243615
I19058_4_seq2	I19059_5_seq2	I19064_11_seq1	I19065_12_seq2	649	635	1188	1312	none	0.275862	0.00296711	-0.0172414	0.852684	0.326531	0.00122717	-0.0204082	0.839893
I19058_4_seq2	I19059_5_seq2	I19064_11_seq1	I19066_13_seq1	652	636	1147	1108	none	0.212766	0.0391276	-0.0851064	0.409294	0.297872	0.00387725	0	1
I19058_4_seq2	I19059_5_seq2	I19064_11_seq1	I19066_13_seq2	648	633	1179	1243	none	0.0485437	0.62225	-0.0485437	0.62225	0.237113	0.019528	0.134021	0.186852
I19058_4_seq2	I19059_5_seq2	I19064_11_seq1	I19067_14_seq1	675	646	1154	1182	none	0.171717	0.0875317	-0.171717	0.0875317	0.333333	0.0015654	-0.0444444	0.67329
I19058_4_seq2	I19059_5_seq2	I19064_11_seq1	I19067_14_seq2	666	648	1200	1264	none	0.14	0.161513	-0.04	0.689157	0.234043	0.0232606	0.0425532	0.679923
I19058_4_seq2	I19059_5_seq2	I19064_11_seq1	I19068_16_seq1	625	610	1119	1228	none	0.12963	0.177932	0.037037	0.700311	0.252747	0.0159064	0.142857	0.172955
I19058_4_seq2	I19059_5_seq2	I19064_11_seq1	I19068_16_seq2	619	607	1100	1208	none	-0.0642202	0.502553	-0.211009	0.0275947	0.235955	0.0260145	0.0561798	0.596113
I19058_4_seq2	I19059_5_seq2	I19064_11_seq2	I19060_6_seq1	647	619	1190	1216	none	-0.0608696	0.513915	0.0434783	0.641035	0.0315789	0.758239	0.157895	0.123812
I19058_4_seq2	I19059_5_seq2	I19064_11_seq2	I19060_6_seq2	644	617	1110	1153	none	-0.134615	0.169811	-0.0384615	0.694887	0.0309278	0.760668	0.134021	0.186852
I19058_4_seq2	I19059_5_seq2	I19064_11_seq2	I19061_7_seq1	670	622	1148	1340	none	0.00970874	0.921509	-0.00970874	0.921509	0.108696	0.297147	0.0869565	0.404248
I19058_4_seq2	I19059_5_seq2	I19064_11_seq2	I19061_7_seq2	671	621	1197	1267	none	-0.0357143	0.705457	0	1	0.113636	0.286422	0.159091	0.135593
I19058_4_seq2	I19059_5_seq2	I19064_11_seq2	I19062_8_seq1	656	622	1135	1270	none	-0.104762	0.283051	0.047619	0.625585	0.0434783	0.676657	0.217391	0.0370562
I19058_4_seq2	I19059_5_seq2	I19064_11_seq2	I19062_8_seq2	656	625	1157	1228	none	-0.242718	0.0137656	-0.0679612	0.490364	0.0434783	0.676657	0.23913	0.0218101
I19058_4_seq2	I19059_5_seq2	I19064_11_seq2	I19065_12_seq1	647	625	1233	1226	none	-0.0408163	0.686168	0.0408163	0.686168	0.101124	0.340085	0.191011	0.071546
I19058_4_seq2	I19059_5_seq2	I19064_11_seq2	I19065_12_seq2	656	627	1157	1220	none	0.163265	0.106042	0.122449	0.225442	0.111111	0.291841	0.0666667	0.527089
I19058_4_seq2	I19059_5_seq2	I19064_11_seq2	I19066_13_seq1	657	623	1192	1099	none	0.0526316	0.607959	0.0315789	0.758239	0.0851064	0.409294	0.0638298	0.536013
I19058_4_seq2	I19059_5_seq2	I19064_11_seq2	I19066_13_seq2	654	623	1142	1153	none	-0.115789	0.259077	0.0736842	0.472643	0.0105263	0.918282	0.2	0.0512526
I19058_4_seq2	I19059_5_seq2	I19064_11_seq2	I19067_14_seq1	682	633	1219	1208	none	0.00934579	0.922986	-0.046729	0.628834	0.103448	0.334594	0.0344828	0.74773
I19058_4_seq2	I19059_5_seq2	I19064_11_seq2	I19067_14_seq2	675	637	1201	1221	none	-0.0309278	0.760668	0.0721649	0.477244	0.0227273	0.83117	0.136364	0.200825
I19058_4_seq2	I19059_5_seq2	I19064_11_seq2	I19068_16_seq1	628	599	1169	1212	none	0.0192308	0.844519	0.192308	0.0498602	0	1	0.2	0.0577796
I19058_4_seq2	I19059_5_seq2	I19064_11_seq2	I19068_16_seq2	624	594	1144	1181	none	-0.207547	0.0326119	-0.0754717	0.437142	0	1	0.159091	0.135593
I19058_4_seq2	I19059_5_seq2	I19067_14_seq1	I19065_12_seq1	689	668	1091	1074	none	-0.0952381	0.382733	0.119048	0.275234	0.0731707	0.507594	0.292683	0.00804068
I19058_4_seq2	I19059_5_seq2	I19067_14_seq1	I19065_12_seq2	693	670	1137	1207	none	0.125	0.185877	0.107143	0.256839	0.111111	0.291841	0.0888889	0.399075
I19058_4_seq2	I19059_5_seq2	I19067_14_seq1	I19066_13_seq1	702	669	1063	982	none	0.0208333	0.838256	0.0833333	0.414216	0.0681818	0.522431	0.136364	0.200825
I19058_4_seq2	I19059_5_seq2	I19067_14_seq1	I19066_13_seq2	700	668	1126	1134	none	-0.137255	0.165684	0.0784314	0.428292	0.011236	0.915583	0.258427	0.014769
I19058_4_seq2	I19059_5_seq2	I19067_14_seq2	I19065_12_seq1	679	674	1177	1134	none	-0.0526316	0.607959	-0.0315789	0.758239	0.139535	0.195668	0.162791	0.131131
I19058_4_seq2	I19059_5_seq2	I19067_14_seq2	I19065_12_seq2	687	675	1114	1148	none	0.1875	0.0661926	0.0208333	0.838256	0.2	0.0577796	0.0222222	0.833029
I19058_4_seq2	I19059_5_seq2	I19067_14_seq2	I19066_13_seq1	694	671	1154	1040	none	0.0652174	0.531615	-0.0434783	0.676657	0.152174	0.1444	0.0434783	0.676657
I19058_4_seq2	I19059_5_seq2	I19067_14_seq2	I19066_13_seq2	690	672	1115	1086	none	-0.103448	0.334594	-0.0114943	0.914621	0.0638298	0.536013	0.148936	0.148742
I19058_4_seq2	I19059_5_seq2	I19068_16_seq1	I19065_12_seq1	620	616	1139	1061	none	0	1	-0.0363636	0.702918	0.172414	0.107798	0.126437	0.238269
I19058_4_seq2	I19059_5_seq2	I19068_16_seq1	I19065_12_seq2	627	612	1150	1160	none	0.125	0.185877	-0.0178571	0.850107	0.191489	0.063374	0.0212766	0.836569
I19058_4_seq2	I19059_5_seq2	I19068_16_seq1	I19066_13_seq1	639	620	1106	958	none	0.0769231	0.432768	-0.0961538	0.3268	0.173913	0.0952928	-0.0217391	0.834827
I19058_4_seq2	I19059_5_seq2	I19068_16_seq1	I19066_13_seq2	635	619	1123	1067	none	-0.0943396	0.331406	-0.0943396	0.331406	0.104167	0.307434	0.104167	0.307434
I19058_4_seq2	I19059_5_seq2	I19068_16_seq1	I19067_14_seq1	652	622	1040	980	none	0.0526316	0.574149	-0.157895	0.0918238	0.213483	0.04401	-0.0561798	0.596113
I19058_4_seq2	I19059_5_seq2	I19068_16_seq1	I19067_14_seq2	648	624	1070	1056	none	0.00884956	0.925052	-0.0619469	0.510214	0.130435	0.210903	0.0434783	0.676657
I19058_4_seq2	I19059_5_seq2	I19068_16_seq2	I19065_12_seq1	620	614	1151	1074	none	0.0947368	0.355809	0.136842	0.182279	0.125	0.263552	0.175	0.117525
I19058_4_seq2	I19059_5_seq2	I19068_16_seq2	I19065_12_seq2	624	608	1104	1101	none	0.314286	0.0012798	0.161905	0.0971097	0.186813	0.0747355	0.010989	0.916512
I19058_4_seq2	I19059_5_seq2	I19068_16_seq2	I19066_13_seq1	639	616	1082	928	none	0.24	0.0163951	0.14	0.161513	0.155556	0.140017	0.0444444	0.67329
I19058_4_seq2	I19059_5_seq2	I19068_16_seq2	I19066_13_seq2	636	617	1098	1036	none	0.097561	0.376992	0.195122	0.0772442	0.0888889	0.399075	0.177778	0.0916903
I19058_4_seq2	I19059_5_seq2	I19068_16_seq2	I19067_14_seq1	649	619	1058	986	none	0.238095	0.0146974	0.104762	0.283051	0.166667	0.12663	0	1
I19058_4_seq2	I19059_5_seq2	I19068_16_seq2	I19067_14_seq2	646	622	1047	1022	none	0.216495	0.0329882	0.216495	0.0329882	0.0930233	0.388323	0.0930233	0.388323
I19059_5_seq1	I19059_5_seq2	I19057_3_seq1	I19057_3_seq2	BAAAA	ABAAA	AABAA	AAABA	introgression	DFO_stat	DFO_Pvalue	DIL_stat	DIL_Pvalue	DFI_stat	DFI_Pvalue	DOL_stat	DOL_Pvalue
I19059_5_seq1	I19059_5_seq2	I19058_4_seq2	I19058_4_seq1	316	319	368	366	none	-0.214286	1.04666e-07	0.136364	0.000713193	-0.159609	7.65481e-05	0.192182	1.91596e-06
I19059_5_seq1	I19059_5_seq2	I19060_6_seq1	I19065_12_seq1	584	544	1411	1362	none	-0.0387597	0.659774	0.0852713	0.332797	-0.0617284	0.578515	0.135802	0.221624
I19059_5_seq1	I19059_5_seq2	I19060_6_seq1	I19065_12_seq2	561	544	1402	1376	none	-0.0277778	0.738883	0.291667	0.000465258	-0.247706	0.009706	0.174312	0.0687788
I19059_5_seq1	I19059_5_seq2	I19060_6_seq1	I19066_13_seq1	598	552	1389	1277	none	0.0757576	0.384088	0.136364	0.117185	-0.0804598	0.452966	0.0114943	0.914621
I19059_5_seq1	I19059_5_seq2	I19060_6_seq1	I19066_13_seq2	594	548	1401	1382	none	0.0338983	0.712702	0.0508475	0.580712	-0.0549451	0.600179	-0.032967	0.753152
I19059_5_seq1	I19059_5_seq2	I19060_6_seq1	I19067_14_seq1	603	566	1366	1288	none	-0.0578512	0.524539	0.0247934	0.785063	-0.0786517	0.458088	0.0337079	0.750485
I19059_5_seq1	I19059_5_seq2	I19060_6_seq1	I19067_14_seq2	585	565	1403	1329	none	-0.151515	0.0817228	0.227273	0.00902344	-0.266055	0.00547458	0.192661	0.0442795
I19059_5_seq1	I19059_5_seq2	I19060_6_seq1	I19068_16_seq1	565	522	1305	1318	none	-0.0357143	0.705457	0.0535714	0.57075	-0.0958904	0.412622	0.0410959	0.725496
I19059_5_seq1	I19059_5_seq2	I19060_6_seq1	I19068_16_seq2	564	515	1302	1300	none	-0.131148	0.147457	-0.114754	0.204976	-0.037037	0.738883	-0.0123457	0.911528
I19059_5_seq1	I19059_5_seq2	I19060_6_seq2	I19065_12_seq1	562	540	1361	1331	none	0.120567	0.152242	-0.0638298	0.448489	0.119266	0.213068	-0.119266	0.213068
I19059_5_seq1	I19059_5_seq2	I19060_6_seq2	I19065_12_seq2	563	539	1342	1340	none	0.147826	0.112908	0.182609	0.0501995	0.132743	0.158221	0.168142	0.0738778
I19059_5_seq1	I19059_5_seq2	I19060_6_seq2	I19066_13_seq1	576	548	1350	1259	none	0.257143	0.00234579	-0.0285714	0.735317	0.130435	0.161886	-0.217391	0.0197395
I19059_5_seq1	I19059_5_seq2	I19060_6_seq2	I19066_13_seq2	572	544	1338	1334	none	0.203125	0.0215563	-0.125	0.157299	0.12605	0.169117	-0.226891	0.0133204
I19059_5_seq1	I19059_5_seq2	I19060_6_seq2	I19067_14_seq1	581	561	1348	1287	none	0.136691	0.107058	-0.122302	0.149325	0.12069	0.193646	-0.189655	0.0410872
I19059_5_seq1	I19059_5_seq2	I19060_6_seq2	I19067_14_seq2	588	562	1360	1314	none	0.0707071	0.481728	0.111111	0.268925	0.153153	0.106621	0.189189	0.0462361
I19059_5_seq1	I19059_5_seq2	I19060_6_seq2	I19068_16_seq1	542	515	1297	1316	none	0.129771	0.137465	-0.114504	0.190008	0.12381	0.204559	-0.180952	0.0637091
I19059_5_seq1	I19059_5_seq2	I19060_6_seq2	I19068_16_seq2	544	511	1258	1268	none	0.0578512	0.524539	-0.289256	0.00146354	0.188679	0.0520679	-0.207547	0.0326119
I19059_5_seq1	I19059_5_seq2	I19061_7_seq1	I19065_12_seq1	557	549	1552	1381	none	0.100671	0.219129	-0.114094	0.163712	0.171171	0.0713254	-0.117117	0.217238
I19059_5_seq1	I19059_5_seq2	I19061_7_seq1	I19065_12_seq2	560	548	1528	1366	none	0.150442	0.109771	0.132743	0.158221	0.192982	0.0393518	0.175439	0.0610447
I19059_5_seq1	I19059_5_seq2	I19061_7_seq1	I19066_13_seq1	570	556	1498	1260	none	0.244755	0.00342417	-0.104895	0.20971	0.186441	0.0428402	-0.237288	0.00994865
I19059_5_seq1	I19059_5_seq2	I19061_7_seq1	I19066_13_seq2	567	552	1497	1349	none	0.191176	0.0257819	-0.176471	0.0395918	0.190083	0.0365362	-0.22314	0.0141063
I19059_5_seq1	I19059_5_seq2	I19061_7_seq1	I19067_14_seq1	575	572	1518	1312	none	0.121622	0.138982	-0.175676	0.0325828	0.162393	0.0789944	-0.213675	0.020819
I19059_5_seq1	I19059_5_seq2	I19061_7_seq1	I19067_14_seq2	581	571	1540	1346	none	0.037037	0.700311	0	1	0.192982	0.0393518	0.157895	0.0918238
I19059_5_seq1	I19059_5_seq2	I19061_7_seq1	I19068_16_seq1	536	521	1435	1320	none	0.114286	0.176296	-0.185714	0.0279918	0.169811	0.0804096	-0.226415	0.0197488
I19059_5_seq1	I19059_5_seq2	I19061_7_seq1	I19068_16_seq2	538	515	1405	1282	none	0.0359712	0.671497	-0.309353	0.000265101	0.229358	0.0166401	-0.211009	0.0275947
I19059_5_seq1	I19059_5_seq2	I19061_7_seq2	I19065_12_seq1	580	550	1455	1388	none	-0.046875	0.595883	0.09375	0.288844	-0.13253	0.227275	0.0843373	0.442279
I19059_5_seq1	I19059_5_seq2	I19061_7_seq2	I19065_12_seq2	559	548	1418	1365	none	-0.0405405	0.621873	0.283784	0.000555667	-0.267857	0.00458639	0.160714	0.088973
I19059_5_seq1	I19059_5_seq2	I19061_7_seq2	I19066_13_seq1	596	554	1409	1274	none	0.0518519	0.546865	0.125926	0.143433	-0.123596	0.243615	-0.011236	0.915583
I19059_5_seq1	I19059_5_seq2	I19061_7_seq2	I19066_13_seq2	593	551	1411	1376	none	-0.00869565	0.925705	0.0608696	0.513915	-0.120879	0.248864	-0.032967	0.753152
I19059_5_seq1	I19059_5_seq2	I19061_7_seq2	I19067_14_seq1	600	570	1440	1340	none	-0.078125	0.376759	0.015625	0.859684	-0.142857	0.172955	-0.010989	0.916512
I19059_5_seq1	I19059_5_seq2	I19061_7_seq2	I19067_14_seq2	583	570	1430	1343	none	-0.182482	0.032688	0.19708	0.0210679	-0.309091	0.00118789	0.163636	0.0861195
I19059_5_seq1	I19059_5_seq2	I19061_7_seq2	I19068_16_seq1	562	518	1360	1347	none	-0.129032	0.150763	0.0322581	0.719438	-0.185185	0.0955807	0.0617284	0.578515
I19059_5_seq1	I19059_5_seq2	I19061_7_seq2	I19068_16_seq2	563	514	1321	1290	none	-0.196581	0.0334741	-0.111111	0.229421	-0.121951	0.269456	0	1
I19059_5_seq1	I19059_5_seq2	I19062_8_seq1	I19065_12_seq1	556	559	1528	1395	none	0.146667	0.072448	-0.0666667	0.414216	0.148515	0.135554	-0.168317	0.0907293
I19059_5_seq1	I19059_5_seq2	I19062_8_seq1	I19065_12_seq2	562	558	1473	1356	none	0.221239	0.0186827	0.185841	0.0482099	0.192308	0.0498602	0.153846	0.116664
I19059_5_seq1	I19059_5_seq2	I19062_8_seq1	I19066_13_seq1	570	566	1452	1246	none	0.258278	0.0015047	-0.0331126	0.684086	0.137615	0.150792	-0.266055	0.00547458
I19059_5_seq1	I19059_5_seq2	I19062_8_seq1	I19066_13_seq2	567	564	1470	1353	none	0.242424	0.00534877	-0.106061	0.223017	0.145455	0.127124	-0.272727	0.00423123
I19059_5_seq1	I19059_5_seq2	I19062_8_seq1	I19067_14_seq1	577	582	1469	1324	none	0.164384	0.0470051	-0.0958904	0.2466	0.12963	0.177932	-0.222222	0.0209213
I19059_5_seq1	I19059_5_seq2	I19062_8_seq1	I19067_14_seq2	582	583	1502	1356	none	0.102804	0.287596	0.102804	0.287596	0.134615	0.169811	0.134615	0.169811
I19059_5_seq1	I19059_5_seq2	I19062_8_seq1	I19068_16_seq1	541	528	1388	1301	none	0.164179	0.0573662	-0.119403	0.166914	0.142857	0.157299	-0.244898	0.0153351
I19059_5_seq1	I19059_5_seq2	I19062_8_seq1	I19068_16_seq2	540	524	1368	1277	none	0.0977444	0.25964	-0.263158	0.00240628	0.176471	0.0747059	-0.294118	0.00297371
I19059_5_seq1	I19059_5_seq2	I19062_8_seq2	I19065_12_seq1	583	559	1474	1384	none	0.0461538	0.598725	0.184615	0.0352966	-0.128205	0.257518	0.102564	0.36503
I19059_5_seq1	I19059_5_seq2	I19062_8_seq2	I19065_12_seq2	562	557	1445	1368	none	0.0540541	0.510798	0.378378	4.16105e-06	-0.296296	0.00207556	0.148148	0.123658
I19059_5_seq1	I19059_5_seq2	I19062_8_seq2	I19066_13_seq1	596	565	1433	1267	none	0.209302	0.0174438	0.24031	0.00634501	-0.116279	0.280888	-0.0697674	0.517634
I19059_5_seq1	I19059_5_seq2	I19062_8_seq2	I19066_13_seq2	593	564	1418	1349	none	0.178571	0.0587817	0.214286	0.0233422	-0.103448	0.334594	-0.0574713	0.59192
I19059_5_seq1	I19059_5_seq2	I19062_8_seq2	I19067_14_seq1	602	581	1404	1294	none	0.0598291	0.517535	0.162393	0.0789944	-0.152941	0.158526	-0.0117647	0.913627
I19059_5_seq1	I19059_5_seq2	I19062_8_seq2	I19067_14_seq2	584	582	1436	1323	none	-0.0551181	0.534501	0.338583	0.000135834	-0.333333	0.000636299	0.142857	0.143235
I19059_5_seq1	I19059_5_seq2	I19062_8_seq2	I19068_16_seq1	569	528	1336	1305	none	0.0535714	0.57075	0.196429	0.0376353	-0.173333	0.133327	0.04	0.729034
I19059_5_seq1	I19059_5_seq2	I19062_8_seq2	I19068_16_seq2	566	525	1316	1275	none	-0.026087	0.779668	0.026087	0.779668	-0.15	0.179712	-0.075	0.502335
I19059_5_seq1	I19059_5_seq2	I19064_11_seq1	I19060_6_seq1	583	550	1130	1203	none	0.0434783	0.641035	-0.0434783	0.641035	0.0117647	0.913627	-0.105882	0.328972
I19059_5_seq1	I19059_5_seq2	I19064_11_seq1	I19060_6_seq2	561	544	1170	1226	none	-0.149254	0.0840354	0.104478	0.226503	-0.196429	0.0376353	0.107143	0.256839
I19059_5_seq1	I19059_5_seq2	I19064_11_seq1	I19061_7_seq1	555	556	1172	1381	none	-0.144928	0.0886592	0.15942	0.0611009	-0.206897	0.0258576	0.155172	0.0946707
I19059_5_seq1	I19059_5_seq2	I19064_11_seq1	I19061_7_seq2	583	557	1224	1327	none	0.0909091	0.317311	-0.0413223	0.649436	0.0232558	0.829248	-0.162791	0.131131
I19059_5_seq1	I19059_5_seq2	I19064_11_seq1	I19062_8_seq1	563	565	1163	1318	none	-0.181102	0.0412588	0.133858	0.131425	-0.262136	0.00780504	0.126214	0.200219
I19059_5_seq1	I19059_5_seq2	I19064_11_seq1	I19062_8_seq2	592	565	1167	1286	none	-0.0707071	0.481728	-0.171717	0.0875317	0	1	-0.128205	0.257518
I19059_5_seq1	I19059_5_seq2	I19064_11_seq1	I19064_11_seq2	577	576	891	896	none	-0.212766	0.0391276	0.255319	0.0133083	-0.233645	0.0156558	0.17757	0.0662395
I19059_5_seq1	I19059_5_seq2	I19064_11_seq1	I19065_12_seq1	572	552	1231	1259	none	-0.06	0.548506	0.06	0.548506	-0.0933333	0.418923	0.0666667	0.563703
I19059_5_seq1	I19059_5_seq2	I19064_11_seq1	I19065_12_seq2	549	549	1234	1297	none	-0.0222222	0.796253	0.288889	0.000789113	-0.264151	0.00653608	0.132075	0.173893
I19059_5_seq1	I19059_5_seq2	I19064_11_seq1	I19066_13_seq1	585	559	1188	1153	none	0.173077	0.0775562	0.134615	0.169811	-0.0487805	0.658687	-0.097561	0.376992
I19059_5_seq1	I19059_5_seq2	I19064_11_seq1	I19066_13_seq2	585	556	1219	1285	none	0.0851064	0.409294	0.0425532	0.679923	-0.0238095	0.827259	-0.0714286	0.512691
I19059_5_seq1	I19059_5_seq2	I19064_11_seq1	I19067_14_seq1	589	573	1201	1208	none	0.0204082	0.839893	0	1	-0.060241	0.583128	-0.0843373	0.442279
I19059_5_seq1	I19059_5_seq2	I19064_11_seq1	I19067_14_seq2	571	573	1244	1269	none	-0.105263	0.261054	0.245614	0.00873026	-0.269231	0.00603956	0.115385	0.239317
I19059_5_seq1	I19059_5_seq2	I19064_11_seq1	I19068_16_seq1	562	529	1147	1252	none	0.0196078	0.843022	0.0784314	0.428292	-0.0810811	0.485499	0	1
I19059_5_seq1	I19059_5_seq2	I19064_11_seq1	I19068_16_seq2	560	526	1141	1234	none	-0.117647	0.234764	-0.137255	0.165684	-0.0632911	0.573745	-0.0886076	0.430953
I19059_5_seq1	I19059_5_seq2	I19064_11_seq2	I19060_6_seq1	562	546	1180	1248	none	0.18797	0.0301758	-0.218045	0.0119161	0.218182	0.0221195	-0.272727	0.00423123
I19059_5_seq1	I19059_5_seq2	I19064_11_seq2	I19060_6_seq2	564	541	1133	1187	none	0	1	-0.106383	0.302343	0.221239	0.0186827	0.132743	0.158221
I19059_5_seq1	I19059_5_seq2	I19064_11_seq2	I19061_7_seq1	559	554	1171	1385	none	0.00990099	0.920738	-0.00990099	0.920738	0.2	0.031972	0.182609	0.0501995
I19059_5_seq1	I19059_5_seq2	I19064_11_seq2	I19061_7_seq2	560	552	1191	1301	none	0.235294	0.00606997	-0.205882	0.0163512	0.20354	0.0304906	-0.327434	0.000500167
I19059_5_seq1	I19059_5_seq2	I19064_11_seq2	I19062_8_seq1	569	559	1158	1316	none	-0.0309278	0.760668	-0.0515464	0.611683	0.2	0.040424	0.180952	0.0637091
I19059_5_seq1	I19059_5_seq2	I19064_11_seq2	I19062_8_seq2	568	562	1151	1268	none	0.0967742	0.281198	-0.322581	0.000328016	0.17757	0.0662395	-0.308411	0.00142159
I19059_5_seq1	I19059_5_seq2	I19064_11_seq2	I19065_12_seq1	545	548	1234	1260	none	0.12605	0.169117	-0.159664	0.0815562	0.142857	0.143235	-0.180952	0.0637091
I19059_5_seq1	I19059_5_seq2	I19064_11_seq2	I19065_12_seq2	549	545	1185	1233	none	0.2	0.0512526	0.157895	0.123812	0.185185	0.0542918	0.148148	0.123658
I19059_5_seq1	I19059_5_seq2	I19064_11_seq2	I19066_13_seq1	559	554	1188	1143	none	0.287879	0.00094141	-0.0909091	0.29627	0.150442	0.109771	-0.292035	0.00190679
I19059_5_seq1	I19059_5_seq2	I19064_11_seq2	I19066_13_seq2	558	554	1141	1196	none	0.243243	0.0103854	-0.189189	0.0462361	0.168142	0.0738778	-0.256637	0.00637021
I19059_5_seq1	I19059_5_seq2	I19064_11_seq2	I19067_14_seq1	566	569	1219	1232	none	0.153846	0.0794106	-0.184615	0.0352966	0.145455	0.127124	-0.254545	0.00759201
I19059_5_seq1	I19059_5_seq2	I19064_11_seq2	I19067_14_seq2	571	568	1224	1250	none	0.0652174	0.531615	0.0217391	0.834827	0.174312	0.0687788	0.137615	0.150792
I19059_5_seq1	I19059_5_seq2	I19064_11_seq2	I19068_16_seq1	537	528	1168	1256	none	0.216667	0.0176221	-0.116667	0.201243	0.16	0.109599	-0.24	0.0163951
I19059_5_seq1	I19059_5_seq2	I19064_11_seq2	I19068_16_seq2	537	522	1141	1211	none	0.0833333	0.36131	-0.316667	0.000522575	0.207547	0.0326119	-0.245283	0.0115585
I19059_5_seq1	I19059_5_seq2	I19066_13_seq1	I19065_12_seq1	586	552	1026	1095	none	-0.148148	0.123658	-0.0185185	0.84739	-0.097561	0.376992	0.0731707	0.507594
I19059_5_seq1	I19059_5_seq2	I19066_13_seq1	I19065_12_seq2	565	550	1003	1093	none	-0.126761	0.130909	0.183099	0.029119	-0.259259	0.00705364	0.148148	0.123658
I19059_5_seq1	I19059_5_seq2	I19066_13_seq2	I19065_12_seq1	587	552	1130	1114	none	-0.103448	0.334594	0.0344828	0.74773	-0.0512821	0.650613	0.102564	0.36503
I19059_5_seq1	I19059_5_seq2	I19066_13_seq2	I19065_12_seq2	563	549	1050	1055	none	-0.072	0.420829	0.28	0.00174512	-0.259259	0.00705364	0.148148	0.123658
I19059_5_seq1	I19059_5_seq2	I19067_14_seq1	I19065_12_seq1	589	566	1113	1106	none	-0.0638298	0.536013	0.0638298	0.536013	-0.075	0.502335	0.075	0.502335
I19059_5_seq1	I19059_5_seq2	I19067_14_seq1	I19065_12_seq2	568	564	1165	1196	none	-0.034965	0.675859	0.258741	0.00197414	-0.247706	0.009706	0.137615	0.150792
I19059_5_seq1	I19059_5_seq2	I19067_14_seq1	I19066_13_seq1	607	573	1086	1032	none	0.137931	0.137395	0.12069	0.193646	-0.0232558	0.829248	-0.0465116	0.666228
I19059_5_seq1	I19059_5_seq2	I19067_14_seq1	I19066_13_seq2	601	570	1143	1175	none	0.0357143	0.705457	0.0178571	0.850107	-0.0549451	0.600179	-0.0769231	0.463071
I19059_5_seq1	I19059_5_seq2	I19067_14_seq2	I19065_12_seq1	568	568	1181	1166	none	0.0645161	0.472498	-0.177419	0.0481935	0.0873786	0.375189	-0.203883	0.0385281
I19059_5_seq1	I19059_5_seq2	I19067_14_seq2	I19065_12_seq2	574	564	1142	1155	none	0.113402	0.264045	0.113402	0.264045	0.161905	0.0971097	0.161905	0.0971097
I19059_5_seq1	I19059_5_seq2	I19067_14_seq2	I19066_13_seq1	588	573	1155	1087	none	0.227273	0.00902344	-0.106061	0.223017	0.137615	0.150792	-0.266055	0.00547458
I19059_5_seq1	I19059_5_seq2	I19067_14_seq2	I19066_13_seq2	583	573	1115	1129	none	0.181818	0.0565303	-0.218182	0.0221195	0.117117	0.217238	-0.279279	0.0032569
I19059_5_seq1	I19059_5_seq2	I19068_16_seq1	I19065_12_seq1	553	516	1176	1090	none	0.0185185	0.84739	0.037037	0.700311	0.0136986	0.906827	0.0410959	0.725496
I19059_5_seq1	I19059_5_seq2	I19068_16_seq1	I19065_12_seq2	531	513	1193	1147	none	-0.0222222	0.796253	0.244444	0.0045087	-0.215686	0.0293819	0.137255	0.165684
I19059_5_seq1	I19059_5_seq2	I19068_16_seq1	I19066_13_seq1	569	530	1145	1005	none	0.189655	0.0410872	0.0689655	0.457614	0.0649351	0.568811	-0.116883	0.305059
I19059_5_seq1	I19059_5_seq2	I19068_16_seq1	I19066_13_seq2	565	528	1159	1108	none	0.0909091	0.365712	-0.0707071	0.481728	0.075	0.502335	-0.125	0.263552
I19059_5_seq1	I19059_5_seq2	I19068_16_seq1	I19067_14_seq1	571	535	1088	1007	none	0.0178571	0.850107	-0.0535714	0.57075	0.0379747	0.73572	-0.0632911	0.573745
I19059_5_seq1	I19059_5_seq2	I19068_16_seq1	I19067_14_seq2	553	536	1117	1063	none	-0.0839695	0.336515	0.145038	0.0969069	-0.2	0.0455003	0.1	0.317311
I19059_5_seq1	I19059_5_seq2	I19068_16_seq2	I19065_12_seq1	550	512	1176	1106	none	0.0392157	0.692061	0.156863	0.11314	-0.102564	0.36503	0.0512821	0.650613
I19059_5_seq1	I19059_5_seq2	I19068_16_seq2	I19065_12_seq2	532	508	1134	1087	none	0.0483871	0.590014	0.403226	7.11789e-06	-0.242718	0.0137656	0.184466	0.0611892
I19059_5_seq1	I19059_5_seq2	I19068_16_seq2	I19066_13_seq1	567	526	1105	974	none	0.264957	0.00415759	0.230769	0.0125549	-0.0243902	0.825199	-0.0731707	0.507594
I19059_5_seq1	I19059_5_seq2	I19068_16_seq2	I19066_13_seq2	565	526	1121	1077	none	0.25	0.0253473	0.175	0.117525	-0.0123457	0.911528	-0.0864198	0.4367
I19059_5_seq1	I19059_5_seq2	I19068_16_seq2	I19067_14_seq1	568	532	1091	1011	none	0.135135	0.154523	0.153153	0.106621	-0.0714286	0.512691	-0.047619	0.662521
I19059_5_seq1	I19059_5_seq2	I19068_16_seq2	I19067_14_seq2	556	533	1081	1029	none	0.0178571	0.850107	0.375	7.22879e-05	-0.232323	0.0208005	0.171717	0.0875317
I19060_6_seq1	I19060_6_seq2	I19057_3_seq1	I19057_3_seq2	BAAAA	ABAAA	AABAA	AAABA	introgression	DFO_stat	DFO_Pvalue	DIL_stat	DIL_Pvalue	DFI_stat	DFI_Pvalue	DOL_stat	DOL_Pvalue
I19060_6_seq1	I19060_6_seq2	I19058_4_seq1	I19059_5_seq1	620	616	672	659	none	0.0877193	0.348972	0.0877193	0.348972	-0.358025	0.001272	-0.358025	0.001272
I19060_6_seq1	I19060_6_seq2	I19058_4_seq1	I19059_5_seq2	620	611	727	700	none	-0.12782	0.140458	0.203008	0.019222	-0.301205	0.00606758	0.228916	0.037022
I19060_6_seq1	I19060_6_seq2	I19058_4_seq2	I19058_4_seq1	650	638	620	649	none	0.28	0.00174512	-0.088	0.325179	0.264368	0.0136685	-0.264368	0.0136685
I19060_6_seq1	I19060_6_seq2	I19058_4_seq2	I19059_5_seq1	623	611	724	716	none	0.319149	0.000150839	0.0070922	0.932885	0.223529	0.0393184	-0.294118	0.00669531
I19060_6_seq1	I19060_6_seq2	I19058_4_seq2	I19059_5_seq2	623	637	696	683	none	0.16	0.109599	0.16	0.109599	-0.142857	0.285049	-0.142857	0.285049
I19060_6_seq1	I19060_6_seq2	I19059_5_seq1	I19059_5_seq2	642	625	595	570	none	-0.247706	0.009706	0.155963	0.10346	-0.307692	0.00657841	0.25641	0.0235401
I19060_6_seq1	I19060_6_seq2	I19061_7_seq1	I19061_7_seq2	362	412	446	486	none	0.298905	4.16334e-14	0.0140845	0.721815	0.181518	7.87904e-06	-0.118812	0.00344678
I19060_6_seq1	I19060_6_seq2	I19062_8_seq1	I19061_7_seq1	329	406	598	566	none	-0.0872894	0.0257088	-0.0627871	0.108614	0.102041	0.0133476	0.129252	0.00172331
I19060_6_seq1	I19060_6_seq2	I19062_8_seq1	I19061_7_seq2	355	391	587	579	none	0.203488	9.42629e-08	-0.0552326	0.147411	0.17301	3.19013e-05	-0.134948	0.0011771
I19060_6_seq1	I19060_6_seq2	I19062_8_seq2	I19061_7_seq1	355	351	546	595	none	-0.16996	2.83531e-06	0.191041	1.41595e-07	-0.196141	9.99411e-07	0.244373	1.09681e-09
I19060_6_seq1	I19060_6_seq2	I19062_8_seq2	I19061_7_seq2	413	368	545	610	none	0.100154	0.0107269	0.226502	7.91518e-09	-0.154827	0.000285944	-0.00546448	0.89812
I19060_6_seq1	I19060_6_seq2	I19064_11_seq1	I19064_11_seq2	514	504	689	694	none	0.145422	0.000598971	-0.245961	6.44135e-09	0.240106	2.94877e-06	-0.335092	6.86616e-11
I19060_6_seq1	I19060_6_seq2	I19065_12_seq1	I19065_12_seq2	564	507	852	854	none	0.00653595	0.888638	-0.106754	0.0221886	-0.0273973	0.639667	-0.205479	0.000446031
I19060_6_seq1	I19060_6_seq2	I19066_13_seq1	I19065_12_seq1	542	524	870	937	none	0.0457516	0.326989	0.0239651	0.607646	-0.152416	0.0124258	-0.189591	0.00187389
I19060_6_seq1	I19060_6_seq2	I19066_13_seq1	I19065_12_seq2	550	488	865	942	none	0.0462777	0.302217	-0.0744467	0.0969795	-0.003367	0.953728	-0.205387	0.000400766
I19060_6_seq1	I19060_6_seq2	I19066_13_seq2	I19065_12_seq1	552	517	967	952	none	0.0493274	0.297537	0.0852018	0.071963	-0.192593	0.00155286	-0.133333	0.0284597
I19060_6_seq1	I19060_6_seq2	I19066_13_seq2	I19065_12_seq2	554	487	913	910	none	0.0634573	0.17492	-0.00218818	0.96269	-0.0878378	0.130733	-0.189189	0.00113419
I19060_6_seq1	I19060_6_seq2	I19066_13_seq2	I19066_13_seq1	585	546	750	647	none	0.0031348	0.95535	0.103448	0.0646537	-0.189964	0.00150858	-0.0752688	0.208668
I19060_6_seq1	I19060_6_seq2	I19067_14_seq1	I19065_12_seq1	542	533	950	981	none	0.205543	1.89372e-05	0.0762125	0.112767	0	1	-0.212121	0.000567769
I19060_6_seq1	I19060_6_seq2	I19067_14_seq1	I19065_12_seq2	543	494	995	1037	none	0.168539	9.83281e-05	-0.0337079	0.436017	0.122924	0.0329539	-0.23588	4.26983e-05
I19060_6_seq1	I19060_6_seq2	I19067_14_seq1	I19066_13_seq1	559	551	944	915	none	0.146067	0.00206102	0.0516854	0.275579	0.024911	0.676251	-0.124555	0.0368046
I19060_6_seq1	I19060_6_seq2	I19067_14_seq1	I19066_13_seq2	563	538	965	1034	none	0.146497	0.00147605	-0.0106157	0.81779	0.0694444	0.238593	-0.1875	0.00146272
I19060_6_seq1	I19060_6_seq2	I19067_14_seq1	I19067_14_seq2	566	538	790	806	none	0.154791	0.00179143	-0.0663391	0.180786	0.089172	0.114077	-0.197452	0.000467248
I19060_6_seq1	I19060_6_seq2	I19067_14_seq2	I19065_12_seq1	548	503	987	1004	none	0.063745	0.153226	0.0956175	0.0321657	-0.152542	0.00879294	-0.0983051	0.0913258
I19060_6_seq1	I19060_6_seq2	I19067_14_seq2	I19065_12_seq2	557	502	963	990	none	0.0765766	0.106621	-0.0045045	0.924382	-0.129825	0.0284018	-0.25614	1.53123e-05
I19060_6_seq1	I19060_6_seq2	I19067_14_seq2	I19066_13_seq1	564	517	974	934	none	0.0136986	0.756818	0.0958904	0.0301867	-0.149206	0.00809336	-0.015873	0.77816
I19060_6_seq1	I19060_6_seq2	I19067_14_seq2	I19066_13_seq2	571	512	937	992	none	0.0107991	0.816251	0.0323974	0.485735	-0.124601	0.0274955	-0.0926518	0.101176
I19060_6_seq1	I19060_6_seq2	I19068_16_seq1	I19065_12_seq1	510	503	1013	936	none	0.125	0.0061699	-0.00416667	0.927264	0.010989	0.855922	-0.216117	0.000355835
I19060_6_seq1	I19060_6_seq2	I19068_16_seq1	I19065_12_seq2	508	457	1036	974	none	0.0902527	0.0336454	-0.122744	0.00386416	0.149206	0.00809336	-0.225397	6.32364e-05
I19060_6_seq1	I19060_6_seq2	I19068_16_seq1	I19066_13_seq1	533	514	1021	872	none	0.0683761	0.139087	-0.0470085	0.309177	0.0567376	0.340698	-0.134752	0.0236439
I19060_6_seq1	I19060_6_seq2	I19068_16_seq1	I19066_13_seq2	533	513	1037	977	none	0.0491071	0.298618	-0.116071	0.0140193	0.045614	0.441268	-0.214035	0.000302292
I19060_6_seq1	I19060_6_seq2	I19068_16_seq1	I19067_14_seq1	523	526	998	870	none	-0.0765864	0.101582	-0.0853392	0.0681002	-0.020979	0.722749	-0.034965	0.554311
I19060_6_seq1	I19060_6_seq2	I19068_16_seq1	I19067_14_seq2	526	498	1000	901	none	0.0218688	0.623804	-0.11332	0.0110377	0.0670927	0.235231	-0.15016	0.00789337
I19060_6_seq1	I19060_6_seq2	I19068_16_seq2	I19065_12_seq1	528	493	988	971	none	0.114345	0.0121491	0.155925	0.000626889	-0.216418	0.000395732	-0.141791	0.020275
I19060_6_seq1	I19060_6_seq2	I19068_16_seq2	I19065_12_seq2	535	460	968	949	none	0.106029	0.0200506	0.035343	0.438261	-0.0625	0.288844	-0.180556	0.00218304
I19060_6_seq1	I19060_6_seq2	I19068_16_seq2	I19066_13_seq1	554	516	972	879	none	0.0660147	0.181855	0.163814	0.000923218	-0.241379	9.63509e-05	-0.0881226	0.154544
I19060_6_seq1	I19060_6_seq2	I19068_16_seq2	I19066_13_seq2	563	506	966	962	none	0.056701	0.264045	0.0927835	0.0676061	-0.166667	0.00676874	-0.113636	0.0648382
I19060_6_seq1	I19060_6_seq2	I19068_16_seq2	I19067_14_seq1	539	517	971	880	none	-0.0913349	0.0591143	0.0866511	0.0733647	-0.240876	6.6856e-05	0.0364964	0.545762
I19060_6_seq1	I19060_6_seq2	I19068_16_seq2	I19067_14_seq2	557	496	944	879	none	0.020979	0.663908	0.0536131	0.266805	-0.126761	0.0326625	-0.0774648	0.191736
I19060_6_seq1	I19060_6_seq2	I19068_16_seq2	I19068_16_seq1	546	528	719	787	none	0	1	0.229508	1.1296e-05	-0.248175	3.99048e-05	0.0583942	0.333746
I19060_6_seq1	I19061_7_seq1	I19057_3_seq1	I19057_3_seq2	BAAAA	ABAAA	AABAA	AAABA	introgression	DFO_stat	DFO_Pvalue	DIL_stat	DIL_Pvalue	DFI_stat	DFI_Pvalue	DOL_stat	DOL_Pvalue
I19060_6_seq1	I19061_7_seq1	I19058_4_seq1	I19059_5_seq1	692	803	660	642	none	0.0555556	0.563703	0	1	-0.283951	0.0106018	-0.358025	0.001272
I19060_6_seq1	I19061_7_seq1	I19058_4_seq1	I19059_5_seq2	690	807	715	690	none	-0.2	0.0253473	0.184	0.0396687	-0.292683	0.00804068	0.292683	0.00804068
I19060_6_seq1	I19061_7_seq1	I19058_4_seq2	I19058_4_seq1	717	835	610	615	none	0.35	0.000126046	-0.15	0.100348	0.372093	0.000559241	-0.325581	0.00253345
I19060_6_seq1	I19061_7_seq1	I19058_4_seq2	I19059_5_seq1	690	804	717	691	none	0.385827	1.37355e-05	-0.133858	0.131425	0.428571	0.000169439	-0.428571	0.000169439
I19060_6_seq1	I19061_7_seq1	I19058_4_seq2	I19059_5_seq2	690	833	683	659	none	0.166667	0.10247	0.0416667	0.683091	0.153846	0.267257	-0.0769231	0.5791
I19060_6_seq1	I19061_7_seq1	I19059_5_seq1	I19059_5_seq2	717	835	577	559	none	-0.28972	0.00272755	0.214953	0.0261825	-0.333333	0.00389242	0.386667	0.000812117
I19060_6_seq1	I19061_7_seq1	I19064_11_seq1	I19064_11_seq2	551	724	665	682	none	0.15	0.000625001	-0.146154	0.000859704	0.22865	1.32237e-05	-0.195592	0.000194131
I19060_6_seq1	I19061_7_seq1	I19065_12_seq1	I19065_12_seq2	612	729	838	826	none	0.0639269	0.180932	-0.146119	0.00222791	0.109635	0.0571596	-0.196013	0.000672127
I19060_6_seq1	I19061_7_seq1	I19066_13_seq1	I19065_12_seq1	591	732	847	924	none	-0.00921659	0.847737	0.115207	0.0163916	-0.198413	0.00163436	0.015873	0.801059
I19060_6_seq1	I19061_7_seq1	I19066_13_seq1	I19065_12_seq2	595	702	838	912	none	0.0480167	0.293306	-0.0271399	0.552522	-0.0201342	0.728163	-0.14094	0.0149745
I19060_6_seq1	I19061_7_seq1	I19066_13_seq2	I19065_12_seq1	594	726	946	932	none	-0.0288462	0.556298	0.182692	0.000194383	-0.274809	8.6603e-06	0.0610687	0.322916
I19060_6_seq1	I19061_7_seq1	I19066_13_seq2	I19065_12_seq2	602	706	901	885	none	0.0506912	0.290953	0.0368664	0.442473	-0.0989761	0.0902276	-0.119454	0.0408823
I19060_6_seq1	I19061_7_seq1	I19066_13_seq2	I19066_13_seq1	654	758	743	632	none	-0.0161812	0.776073	0.0938511	0.0989936	-0.222642	0.000289699	-0.0943396	0.124603
I19060_6_seq1	I19061_7_seq1	I19067_14_seq1	I19065_12_seq1	596	753	900	942	123	0.165432	0.000870781	0.130864	0.00844871	0.0322581	0.611453	-0.0241935	0.703203
I19060_6_seq1	I19061_7_seq1	I19067_14_seq1	I19065_12_seq2	595	721	957	1006	none	0.192843	1.52521e-05	-0.0258449	0.562157	0.16388	0.00460063	-0.204013	0.000419154
I19060_6_seq1	I19061_7_seq1	I19067_14_seq1	I19066_13_seq1	621	748	901	882	none	0.167816	0.000465115	0.0114943	0.810538	0.0943396	0.124603	-0.162264	0.00825474
I19060_6_seq1	I19061_7_seq1	I19067_14_seq1	I19066_13_seq2	620	741	932	1020	none	0.180828	0.000107016	-0.0544662	0.243251	0.125448	0.0361359	-0.261649	1.24022e-05
I19060_6_seq1	I19061_7_seq1	I19067_14_seq1	I19067_14_seq2	647	769	764	796	none	0.143617	0.00535546	0	1	0.136691	0.0226618	-0.057554	0.337248
I19060_6_seq1	I19061_7_seq1	I19067_14_seq2	I19065_12_seq1	591	725	944	970	none	0.0310559	0.494908	0.134576	0.00310042	-0.0992908	0.0954397	0.0780142	0.190168
I19060_6_seq1	I19061_7_seq1	I19067_14_seq2	I19065_12_seq2	596	725	930	951	none	0.106576	0.0252148	-0.00226757	0.96202	-0.0408163	0.484018	-0.204082	0.000466532
I19060_6_seq1	I19061_7_seq1	I19067_14_seq2	I19066_13_seq1	622	723	946	902	none	0.0489796	0.278272	0.0122449	0.786351	-0.00346021	0.953093	-0.0657439	0.263718
I19060_6_seq1	I19061_7_seq1	I19067_14_seq2	I19066_13_seq2	624	722	913	972	none	0.0681818	0.152661	-0.05	0.294266	0.0101695	0.861341	-0.166102	0.00433236
I19060_6_seq1	I19061_7_seq1	I19068_16_seq1	I19065_12_seq1	553	704	966	919	none	0.105882	0.029049	0.04	0.409587	0.0330579	0.607071	-0.0826446	0.198566
I19060_6_seq1	I19061_7_seq1	I19068_16_seq1	I19065_12_seq2	547	665	992	943	none	0.112	0.0122661	-0.112	0.0122661	0.156146	0.00674792	-0.215947	0.000179292
I19060_6_seq1	I19061_7_seq1	I19068_16_seq1	I19066_13_seq1	586	693	980	856	none	0.0977778	0.0380626	-0.0844444	0.0732392	0.119048	0.0587817	-0.206349	0.00105403
I19060_6_seq1	I19061_7_seq1	I19068_16_seq1	I19066_13_seq2	585	691	985	959	none	0.0917431	0.0554093	-0.142202	0.00298516	0.129771	0.0356825	-0.259542	2.65675e-05
I19060_6_seq1	I19061_7_seq1	I19068_16_seq1	I19067_14_seq1	578	730	953	845	none	-0.0873786	0.0761305	-0.0873786	0.0761305	-0.0204082	0.749394	-0.0204082	0.749394
I19060_6_seq1	I19061_7_seq1	I19068_16_seq1	I19067_14_seq2	578	691	945	868	none	0.0365591	0.430488	-0.101075	0.0292891	0.114286	0.0558293	-0.114286	0.0558293
I19060_6_seq1	I19061_7_seq1	I19068_16_seq2	I19065_12_seq1	563	690	950	939	none	0.077951	0.0985851	0.193764	4.02946e-05	-0.176	0.00538913	0.032	0.612882
I19060_6_seq1	I19061_7_seq1	I19068_16_seq2	I19065_12_seq2	567	671	947	917	none	0.119639	0.0117988	0.0248307	0.601235	-0.0318021	0.592654	-0.180212	0.00243233
I19060_6_seq1	I19061_7_seq1	I19068_16_seq2	I19066_13_seq1	597	691	930	839	none	0.0795181	0.105252	0.0650602	0.185046	-0.0988142	0.116012	-0.12253	0.051301
I19060_6_seq1	I19061_7_seq1	I19068_16_seq2	I19066_13_seq2	603	691	941	948	none	0.0904393	0.0752152	0.00775194	0.878794	-0.0588235	0.347558	-0.184314	0.00324782
I19060_6_seq1	I19061_7_seq1	I19068_16_seq2	I19067_14_seq1	588	713	936	840	none	-0.107399	0.0279211	0.0739857	0.129912	-0.189189	0.00232903	0.104247	0.093406
I19060_6_seq1	I19061_7_seq1	I19068_16_seq2	I19067_14_seq2	590	692	913	845	none	0.0168675	0.731135	0.0457831	0.350989	-0.0869565	0.148562	-0.0434783	0.470101
I19060_6_seq1	I19061_7_seq1	I19068_16_seq2	I19068_16_seq1	610	722	699	743	none	-0.0144092	0.788381	0.198847	0.000212131	-0.171315	0.00664489	0.123506	0.0503824
I19060_6_seq1	I19061_7_seq2	I19057_3_seq1	I19057_3_seq2	BAAAA	ABAAA	AABAA	AAABA	introgression	DFO_stat	DFO_Pvalue	DIL_stat	DIL_Pvalue	DFI_stat	DFI_Pvalue	DOL_stat	DOL_Pvalue
I19060_6_seq1	I19061_7_seq2	I19058_4_seq1	I19059_5_seq1	848	853	657	641	none	0.100917	0.292062	0.0642202	0.502553	0.0617284	0.578515	0.0123457	0.911528
I19060_6_seq1	I19061_7_seq2	I19058_4_seq1	I19059_5_seq2	845	857	736	685	none	0.0873786	0.375189	-0.00970874	0.921509	0.108434	0.323212	-0.0120482	0.912596
I19060_6_seq1	I19061_7_seq2	I19058_4_seq2	I19058_4_seq1	875	890	605	638	none	0.0909091	0.365712	0.0707071	0.481728	0.032967	0.753152	0.010989	0.916512
I19060_6_seq1	I19061_7_seq2	I19058_4_seq2	I19059_5_seq1	840	851	712	718	none	0.211538	0.0309841	0.192308	0.0498602	-0.0117647	0.913627	-0.0352941	0.744882
I19060_6_seq1	I19061_7_seq2	I19058_4_seq2	I19059_5_seq2	840	855	677	656	none	0.1875	0.0661926	0.104167	0.307434	0.0238095	0.827259	-0.0714286	0.512691
I19060_6_seq1	I19061_7_seq2	I19059_5_seq1	I19059_5_seq2	869	881	599	553	none	-0.0232558	0.829248	-0.0930233	0.388323	0.0731707	0.507594	0	1
I19060_6_seq1	I19061_7_seq2	I19064_11_seq1	I19064_11_seq2	647	775	661	705	none	0.105788	0.017891	-0.185629	3.25382e-05	0.246575	2.46371e-07	-0.086758	0.0694148
I19060_6_seq1	I19061_7_seq2	I19065_12_seq1	I19065_12_seq2	727	791	837	847	none	0.00483092	0.921698	-0.0869565	0.0768432	0.0289017	0.590851	-0.0809249	0.13225
I19060_6_seq1	I19061_7_seq2	I19066_13_seq1	I19065_12_seq1	686	753	831	912	none	0.00221729	0.962443	0.0509978	0.278796	-0.0619469	0.254052	0.00294985	0.956686
I19060_6_seq1	I19061_7_seq2	I19066_13_seq1	I19065_12_seq2	695	743	826	929	none	0	1	-0.017316	0.709749	0.00286533	0.957311	-0.0200573	0.707883
I19060_6_seq1	I19061_7_seq2	I19066_13_seq2	I19065_12_seq1	689	751	943	922	none	-0.00705882	0.884299	0.0870588	0.0726914	-0.0946746	0.0817589	0.0236686	0.663459
I19060_6_seq1	I19061_7_seq2	I19066_13_seq2	I19065_12_seq2	698	750	901	905	none	0.00485437	0.921509	0.0242718	0.62225	-0.0529412	0.328972	-0.0294118	0.587594
I19060_6_seq1	I19061_7_seq2	I19066_13_seq2	I19066_13_seq1	748	771	735	614	none	-0.00621118	0.911255	0.0559006	0.315812	-0.037037	0.487752	0.019943	0.708678
I19060_6_seq1	I19061_7_seq2	I19067_14_seq1	I19065_12_seq1	692	781	897	931	none	0.192214	9.7479e-05	0.0121655	0.805193	0.139394	0.0113344	-0.0848485	0.123232
I19060_6_seq1	I19061_7_seq2	I19067_14_seq1	I19065_12_seq2	695	758	952	1014	none	0.169043	0.000179865	-0.0794297	0.0784001	0.204482	0.000111742	-0.137255	0.00950446
I19060_6_seq1	I19061_7_seq2	I19067_14_seq1	I19066_13_seq1	709	754	890	857	none	0.172113	0.000226553	-0.0501089	0.283025	0.234637	9.01522e-06	-0.0502793	0.341437
I19060_6_seq1	I19061_7_seq2	I19067_14_seq1	I19066_13_seq2	703	750	922	1007	none	0.185654	5.30031e-05	-0.0886076	0.0537155	0.222826	1.91528e-05	-0.130435	0.0123434
I19060_6_seq1	I19061_7_seq2	I19067_14_seq1	I19067_14_seq2	745	796	761	796	none	0.146597	0.00416734	-0.0942408	0.0654868	0.226519	1.63384e-05	-0.0276243	0.599174
I19060_6_seq1	I19061_7_seq2	I19067_14_seq2	I19065_12_seq1	691	759	948	960	none	0.057377	0.204976	0.0901639	0.0463945	-0.0415512	0.429835	0.00277008	0.958025
I19060_6_seq1	I19061_7_seq2	I19067_14_seq2	I19065_12_seq2	712	752	914	943	none	0.0692641	0.136547	0	1	0.0451977	0.395108	-0.0451977	0.395108
I19060_6_seq1	I19061_7_seq2	I19067_14_seq2	I19066_13_seq1	717	744	950	889	none	0.0526316	0.242083	0.0283401	0.528767	0.0434783	0.404248	0.0108696	0.834827
I19060_6_seq1	I19061_7_seq2	I19067_14_seq2	I19066_13_seq2	720	743	915	968	none	0.0702948	0.139893	-0.00226757	0.96202	0.0437158	0.402967	-0.0437158	0.402967
I19060_6_seq1	I19061_7_seq2	I19068_16_seq1	I19065_12_seq1	647	724	952	904	none	0.103753	0.0272267	-0.0375276	0.424447	0.125	0.0219468	-0.0654762	0.230062
I19060_6_seq1	I19061_7_seq2	I19068_16_seq1	I19065_12_seq2	648	702	985	956	none	0.0669371	0.137214	-0.103448	0.0216231	0.155556	0.00316276	-0.0777778	0.140017
I19060_6_seq1	I19061_7_seq2	I19068_16_seq1	I19066_13_seq1	667	691	966	835	none	0.0840336	0.0667436	-0.0714286	0.119141	0.17847	0.000798969	-0.0311615	0.558231
I19060_6_seq1	I19061_7_seq2	I19068_16_seq1	I19066_13_seq2	658	693	977	952	none	0.0803571	0.088973	-0.116071	0.0140193	0.138889	0.00840799	-0.105556	0.0452014
I19060_6_seq1	I19061_7_seq2	I19068_16_seq1	I19067_14_seq1	659	732	937	835	none	-0.099768	0.0383366	-0.0440835	0.360088	0.0439883	0.416622	0.11437	0.0346892
I19060_6_seq1	I19061_7_seq2	I19068_16_seq1	I19067_14_seq2	667	707	935	871	none	0.0127119	0.782416	-0.118644	0.00994865	0.141274	0.00727013	-0.0304709	0.562625
I19060_6_seq1	I19061_7_seq2	I19068_16_seq2	I19065_12_seq1	661	719	940	932	none	0.0695652	0.135697	0.169565	0.00027608	-0.12462	0.0237962	0.0151976	0.78281
I19060_6_seq1	I19061_7_seq2	I19068_16_seq2	I19065_12_seq2	672	706	931	926	none	0.0538117	0.255775	0.0807175	0.0882598	-0.0295858	0.586491	0.00591716	0.913372
I19060_6_seq1	I19061_7_seq2	I19068_16_seq2	I19066_13_seq1	682	703	926	833	none	0.059952	0.220856	0.127098	0.00944751	-0.0662651	0.227275	0.0180723	0.741934
I19060_6_seq1	I19061_7_seq2	I19068_16_seq2	I19066_13_seq2	686	700	935	949	none	0.0663265	0.189116	0.0918367	0.0690222	-0.0421687	0.442279	-0.0120482	0.826238
I19060_6_seq1	I19061_7_seq2	I19068_16_seq2	I19067_14_seq1	671	725	925	838	none	-0.123223	0.0113634	0.151659	0.00183651	-0.156342	0.00399489	0.185841	0.000622332
I19060_6_seq1	I19061_7_seq2	I19068_16_seq2	I19067_14_seq2	691	716	906	856	none	-0.0121655	0.805193	0.0705596	0.152584	-0.0510511	0.351546	0.0510511	0.351546
I19060_6_seq1	I19061_7_seq2	I19068_16_seq2	I19068_16_seq1	703	737	691	739	none	-0.0227273	0.669815	0.25	2.7265e-06	-0.115044	0.034159	0.168142	0.00196273
I19060_6_seq1	I19062_8_seq1	I19057_3_seq1	I19057_3_seq2	BAAAA	ABAAA	AABAA	AAABA	introgression	DFO_stat	DFO_Pvalue	DIL_stat	DIL_Pvalue	DFI_stat	DFI_Pvalue	DOL_stat	DOL_Pvalue
I19060_6_seq1	I19062_8_seq1	I19058_4_seq1	I19059_5_seq1	734	803	647	617	none	0.0973451	0.300766	0.079646	0.397191	-0.255319	0.0133083	-0.276596	0.00732502
I19060_6_seq1	I19062_8_seq1	I19058_4_seq1	I19059_5_seq2	732	807	704	664	none	-0.157895	0.0686174	0.233083	0.00718726	-0.276596	0.00732502	0.276596	0.00732502
I19060_6_seq1	I19062_8_seq1	I19058_4_seq2	I19058_4_seq1	772	843	604	636	none	0.258621	0.00534568	-0.155172	0.0946707	0.247312	0.0170796	-0.268817	0.00953146
I19060_6_seq1	I19062_8_seq1	I19058_4_seq2	I19059_5_seq1	737	801	698	677	none	0.309353	0.000265101	-0.0647482	0.445243	0.284211	0.00560319	-0.263158	0.0103192
I19060_6_seq1	I19062_8_seq1	I19058_4_seq2	I19059_5_seq2	735	832	665	643	none	0.102041	0.312422	0.122449	0.225442	-0.0571429	0.632585	-0.0285714	0.81107
I19060_6_seq1	I19062_8_seq1	I19059_5_seq1	I19059_5_seq2	761	833	580	565	none	-0.292929	0.00356134	0.212121	0.0348085	-0.325581	0.00253345	0.255814	0.0176767
I19060_6_seq1	I19062_8_seq1	I19064_11_seq1	I19064_11_seq2	593	679	665	671	none	0.139746	0.00103693	-0.136116	0.00139779	0.136986	0.004145	-0.210046	1.10299e-05
I19060_6_seq1	I19062_8_seq1	I19065_12_seq1	I19065_12_seq2	650	748	860	813	none	0.0590909	0.21516	-0.213636	7.41987e-06	0.129412	0.0170219	-0.223529	3.76122e-05
I19060_6_seq1	I19062_8_seq1	I19066_13_seq1	I19065_12_seq1	622	742	827	931	none	-0.0213675	0.643902	0.166667	0.000311491	-0.183544	0.00110335	0.0949367	0.0914819
I19060_6_seq1	I19062_8_seq1	I19066_13_seq1	I19065_12_seq2	625	698	844	910	none	0.029703	0.504458	-0.0336634	0.449355	-0.0413223	0.431109	-0.129477	0.0136304
I19060_6_seq1	I19062_8_seq1	I19066_13_seq2	I19065_12_seq1	614	745	935	948	none	-0.0292135	0.537724	0.164045	0.000539109	-0.195046	0.000455898	0.0712074	0.200632
I19060_6_seq1	I19062_8_seq1	I19066_13_seq2	I19065_12_seq2	631	710	905	882	none	0.0380313	0.421355	-0.0380313	0.421355	-0.045977	0.391064	-0.143678	0.00735603
I19060_6_seq1	I19062_8_seq1	I19066_13_seq2	I19066_13_seq1	683	760	743	635	none	-0.0125	0.823063	0.01875	0.737316	-0.134146	0.0151199	-0.103659	0.0604721
I19060_6_seq1	I19062_8_seq1	I19067_14_seq1	I19065_12_seq1	626	758	904	954	123	0.127854	0.00745548	0.173516	0.000281866	-0.00977199	0.864052	0.0553746	0.331926
I19060_6_seq1	I19062_8_seq1	I19067_14_seq1	I19065_12_seq2	627	706	967	991	none	0.147601	0.00058973	-0.0479705	0.264082	0.131868	0.0118734	-0.159341	0.00236558
I19060_6_seq1	I19062_8_seq1	I19067_14_seq1	I19066_13_seq1	654	744	912	881	none	0.140389	0.00252103	-0.0151188	0.744941	0.0936556	0.0883971	-0.123867	0.0242236
I19060_6_seq1	I19062_8_seq1	I19067_14_seq1	I19066_13_seq2	649	739	937	1010	none	0.157025	0.000551221	-0.0165289	0.71613	0.0935673	0.0835656	-0.152047	0.00492593
I19060_6_seq1	I19062_8_seq1	I19067_14_seq1	I19067_14_seq2	676	761	766	785	none	0.128713	0.00967884	0.019802	0.690619	0.0877193	0.104757	-0.0409357	0.44903
I19060_6_seq1	I19062_8_seq1	I19067_14_seq2	I19065_12_seq1	619	742	944	991	none	0.0202429	0.652767	0.149798	0.000870279	-0.10574	0.0543829	0.0876133	0.11094
I19060_6_seq1	I19062_8_seq1	I19067_14_seq2	I19065_12_seq2	632	720	932	944	none	0.0715835	0.124302	-0.0629067	0.176803	-0.00574713	0.914621	-0.183908	0.000601893
I19060_6_seq1	I19062_8_seq1	I19067_14_seq2	I19066_13_seq1	651	720	948	900	none	0.0377358	0.384987	-0.0226415	0.602195	0.0304709	0.562625	-0.0581717	0.269046
I19060_6_seq1	I19062_8_seq1	I19067_14_seq2	I19066_13_seq2	646	722	912	964	none	0.0570825	0.214435	-0.0274841	0.550013	0.00821918	0.875223	-0.10137	0.0527859
I19060_6_seq1	I19062_8_seq1	I19068_16_seq1	I19065_12_seq1	582	708	965	934	none	0.0788913	0.0875434	0.134328	0.00362506	-0.0397351	0.489866	0.0463576	0.420468
I19060_6_seq1	I19062_8_seq1	I19068_16_seq1	I19065_12_seq2	585	657	1005	942	none	0.0814815	0.0582969	-0.0666667	0.121335	0.0985915	0.0632248	-0.126761	0.0169241
I19060_6_seq1	I19062_8_seq1	I19068_16_seq1	I19066_13_seq1	618	692	974	841	none	0.0814196	0.0747565	-0.0229645	0.615244	0.0496894	0.372583	-0.10559	0.0581261
I19060_6_seq1	I19062_8_seq1	I19068_16_seq1	I19066_13_seq2	610	703	996	966	none	0.0717489	0.129711	-0.0358744	0.448677	-0.0031348	0.95535	-0.153605	0.0060793
I19060_6_seq1	I19062_8_seq1	I19068_16_seq1	I19067_14_seq1	612	703	959	844	none	-0.0772532	0.0953817	-0.0300429	0.516637	-0.00946372	0.866192	0.0599369	0.285906
I19060_6_seq1	I19062_8_seq1	I19068_16_seq1	I19067_14_seq2	608	680	963	874	none	0.0176125	0.69053	-0.0254403	0.565233	0.0467836	0.38694	-0.0175439	0.745603
I19060_6_seq1	I19062_8_seq1	I19068_16_seq2	I19065_12_seq1	592	712	942	965	none	0.0980392	0.0356919	0.24183	2.20657e-07	-0.166102	0.00433236	0.0576271	0.322283
I19060_6_seq1	I19062_8_seq1	I19068_16_seq2	I19065_12_seq2	604	661	933	906	none	0.123967	0.00638602	0.0247934	0.585441	0.0265487	0.624974	-0.115044	0.034159
I19060_6_seq1	I19062_8_seq1	I19068_16_seq2	I19066_13_seq1	630	709	938	847	none	0.125604	0.0105986	0.0724638	0.140369	-0.0568562	0.325541	-0.130435	0.0241065
I19060_6_seq1	I19062_8_seq1	I19068_16_seq2	I19066_13_seq2	630	708	937	942	none	0.133159	0.00916123	0.0704961	0.167699	-0.0466667	0.418923	-0.126667	0.0282404
I19060_6_seq1	I19062_8_seq1	I19068_16_seq2	I19067_14_seq1	625	707	937	851	none	-0.0642202	0.179934	0.0642202	0.179934	-0.0891089	0.120875	0.0957096	0.0957121
I19060_6_seq1	I19062_8_seq1	I19068_16_seq2	I19067_14_seq2	622	691	914	851	none	0.0454545	0.340356	0.0636364	0.181926	-0.0372671	0.503665	-0.0124224	0.823605
I19060_6_seq1	I19062_8_seq1	I19068_16_seq2	I19068_16_seq1	646	724	707	756	none	0.032967	0.529368	0.142857	0.00641963	-0.0909091	0.117185	0.043771	0.450647
I19060_6_seq1	I19062_8_seq2	I19057_3_seq1	I19057_3_seq2	BAAAA	ABAAA	AABAA	AAABA	introgression	DFO_stat	DFO_Pvalue	DIL_stat	DIL_Pvalue	DFI_stat	DFI_Pvalue	DOL_stat	DOL_Pvalue
I19060_6_seq1	I19062_8_seq2	I19058_4_seq1	I19059_5_seq1	764	812	649	621	none	0.107143	0.256839	0.142857	0.13057	-0.219512	0.0468374	-0.170732	0.122095
I19060_6_seq1	I19062_8_seq2	I19058_4_seq1	I19059_5_seq2	762	811	729	667	none	0.0363636	0.702918	0.0909091	0.340356	-0.219512	0.0468374	-0.146341	0.185112
I19060_6_seq1	I19062_8_seq2	I19058_4_seq2	I19058_4_seq1	802	851	607	651	none	0.16	0.109599	-0.04	0.689157	-0.0909091	0.393769	-0.318182	0.00283754
I19060_6_seq1	I19062_8_seq2	I19058_4_seq2	I19059_5_seq1	769	809	704	705	none	0.182609	0.0501995	0.217391	0.0197395	-0.204819	0.0620424	-0.156627	0.153599
I19060_6_seq1	I19062_8_seq2	I19058_4_seq2	I19059_5_seq2	768	810	668	644	none	0.122449	0.225442	0.183673	0.0690222	-0.265823	0.0181431	-0.189873	0.0914819
I19060_6_seq1	I19062_8_seq2	I19059_5_seq1	I19059_5_seq2	790	834	604	565	none	-0.0769231	0.496906	-0.0769231	0.496906	-0.189873	0.0914819	-0.189873	0.0914819
I19060_6_seq1	I19062_8_seq2	I19064_11_seq1	I19064_11_seq2	625	683	662	705	none	0.0769231	0.0794106	-0.0923077	0.0352966	0.0023753	0.961129	-0.206651	2.234e-05
I19060_6_seq1	I19062_8_seq2	I19065_12_seq1	I19065_12_seq2	673	733	842	842	none	-0.0394432	0.412866	-0.0487239	0.311761	-0.0574018	0.296331	-0.0694864	0.20616
I19060_6_seq1	I19062_8_seq2	I19066_13_seq1	I19065_12_seq1	640	703	840	925	none	0.0218341	0.640307	0.0567686	0.224404	-0.132075	0.0185106	-0.081761	0.144838
I19060_6_seq1	I19062_8_seq2	I19066_13_seq1	I19065_12_seq2	634	683	837	932	none	-0.0184049	0.684012	0.0184049	0.684012	-0.105263	0.0515759	-0.0526316	0.33039
I19060_6_seq1	I19062_8_seq2	I19066_13_seq2	I19065_12_seq1	644	695	942	939	none	0.0112867	0.812225	0.115124	0.0153894	-0.196262	0.000437578	-0.0529595	0.342698
I19060_6_seq1	I19062_8_seq2	I19066_13_seq2	I19065_12_seq2	645	686	893	901	none	-0.0183486	0.701623	0.087156	0.0687788	-0.184049	0.000890253	-0.0429448	0.43811
I19060_6_seq1	I19062_8_seq2	I19066_13_seq2	I19066_13_seq1	698	730	740	630	none	-0.00613497	0.911799	0.0920245	0.0966038	-0.190332	0.000534599	-0.0936556	0.0883971
I19060_6_seq1	I19062_8_seq2	I19067_14_seq1	I19065_12_seq1	662	710	901	949	123	0.13964	0.0032569	0.189189	6.70654e-05	-0.0984127	0.0806977	-0.0285714	0.61209
I19060_6_seq1	I19062_8_seq2	I19067_14_seq1	I19065_12_seq2	652	693	956	1024	none	0.0804598	0.0660197	0.10728	0.0142439	-0.0877193	0.104757	-0.0467836	0.38694
I19060_6_seq1	I19062_8_seq2	I19067_14_seq1	I19066_13_seq1	676	704	907	890	none	0.108225	0.0200073	0.116883	0.0119945	-0.0783133	0.153599	-0.0662651	0.227275
I19060_6_seq1	I19062_8_seq2	I19067_14_seq1	I19066_13_seq2	676	695	933	1021	none	0.128099	0.00482965	0.0454545	0.317311	-0.0529412	0.328972	-0.170588	0.00165808
I19060_6_seq1	I19062_8_seq2	I19067_14_seq1	I19067_14_seq2	709	748	775	802	none	0.110526	0.0311967	0.0421053	0.41177	-0.0699088	0.204787	-0.148936	0.00690363
I19060_6_seq1	I19062_8_seq2	I19067_14_seq2	I19065_12_seq1	648	704	949	980	none	0.0562249	0.209584	0.13253	0.00310114	-0.144543	0.00778362	-0.0324484	0.550215
I19060_6_seq1	I19062_8_seq2	I19067_14_seq2	I19065_12_seq2	649	702	914	955	none	0.017094	0.711531	0.0769231	0.0960923	-0.141176	0.00923674	-0.0588235	0.278076
I19060_6_seq1	I19062_8_seq2	I19067_14_seq2	I19066_13_seq1	665	693	954	908	none	0.0271318	0.537686	0.0697674	0.113009	-0.11236	0.0340064	-0.0505618	0.340085
I19060_6_seq1	I19062_8_seq2	I19067_14_seq2	I19066_13_seq2	674	692	919	975	none	0.0457516	0.326989	0.0108932	0.815466	-0.0977011	0.0683653	-0.143678	0.00735603
I19060_6_seq1	I19062_8_seq2	I19068_16_seq1	I19065_12_seq1	621	662	973	932	none	0.0995671	0.0323456	0.108225	0.0200073	-0.0666667	0.248213	-0.0533333	0.355611
I19060_6_seq1	I19062_8_seq2	I19068_16_seq1	I19065_12_seq2	609	640	1001	972	none	0.0311284	0.480356	0.0194553	0.659154	-0.0453172	0.40967	-0.0634441	0.248392
I19060_6_seq1	I19062_8_seq2	I19068_16_seq1	I19066_13_seq1	639	651	987	855	none	0.0652174	0.161886	0.0304348	0.513915	-0.0705128	0.212946	-0.121795	0.0314504
I19060_6_seq1	I19062_8_seq2	I19068_16_seq1	I19066_13_seq2	641	645	1001	969	none	0.0533333	0.257899	-0.04	0.396144	-0.0603175	0.284381	-0.193651	0.000588281
I19060_6_seq1	I19062_8_seq2	I19068_16_seq1	I19067_14_seq1	643	662	963	843	none	-0.0729614	0.115252	-0.0686695	0.138242	-0.0691824	0.217315	-0.0628931	0.262056
I19060_6_seq1	I19062_8_seq2	I19068_16_seq1	I19067_14_seq2	637	660	970	891	none	-0.00616016	0.891866	-0.0143737	0.751092	-0.0731707	0.185112	-0.0853659	0.122095
I19060_6_seq1	I19062_8_seq2	I19068_16_seq2	I19065_12_seq1	614	654	945	954	123	0.119149	0.00979205	0.153191	0.000896594	-0.124601	0.0274955	-0.0734824	0.193588
I19060_6_seq1	I19062_8_seq2	I19068_16_seq2	I19065_12_seq2	624	645	935	939	none	0.0704846	0.13314	0.0792952	0.0911115	-0.0709677	0.211476	-0.0580645	0.306624
I19060_6_seq1	I19062_8_seq2	I19068_16_seq2	I19066_13_seq1	644	657	940	852	none	0.101449	0.039	0.0869565	0.0768432	-0.10596	0.065564	-0.125828	0.0287678
I19060_6_seq1	I19062_8_seq2	I19068_16_seq2	I19066_13_seq2	650	656	942	951	none	0.111702	0.0303124	0.0159574	0.756997	-0.0909091	0.117185	-0.212121	0.00025655
I19060_6_seq1	I19062_8_seq2	I19068_16_seq2	I19067_14_seq1	645	670	953	858	none	-0.0494118	0.308369	-0.0352941	0.466854	-0.125	0.0292983	-0.105263	0.0664574
I19060_6_seq1	I19062_8_seq2	I19068_16_seq2	I19067_14_seq2	645	664	922	865	none	0.0280374	0.561886	0.0280374	0.561886	-0.086262	0.126977	-0.086262	0.126977
I19060_6_seq1	I19062_8_seq2	I19068_16_seq2	I19068_16_seq1	666	690	709	766	none	0.0420168	0.427263	0.0756303	0.153007	-0.11039	0.052705	-0.0714286	0.21
I19060_6_seq1	I19065_12_seq1	I19057_3_seq1	I19057_3_seq2	BAAAA	ABAAA	AABAA	AAABA	introgression	DFO_stat	DFO_Pvalue	DIL_stat	DIL_Pvalue	DFI_stat	DFI_Pvalue	DOL_stat	DOL_Pvalue
I19060_6_seq1	I19065_12_seq2	I19057_3_seq1	I19057_3_seq2	BAAAA	ABAAA	AABAA	AAABA	introgression	DFO_stat	DFO_Pvalue	DIL_stat	DIL_Pvalue	DFI_stat	DFI_Pvalue	DOL_stat	DOL_Pvalue
I19060_6_seq1	I19066_13_seq1	I19057_3_seq1	I19057_3_seq2	BAAAA	ABAAA	AABAA	AAABA	introgression	DFO_stat	DFO_Pvalue	DIL_stat	DIL_Pvalue	DFI_stat	DFI_Pvalue	DOL_stat	DOL_Pvalue
I19060_6_seq1	I19066_13_seq2	I19057_3_seq1	I19057_3_seq2	BAAAA	ABAAA	AABAA	AAABA	introgression	DFO_stat	DFO_Pvalue	DIL_stat	DIL_Pvalue	DFI_stat	DFI_Pvalue	DOL_stat	DOL_Pvalue
I19060_6_seq1	I19067_14_seq1	I19057_3_seq1	I19057_3_seq2	BAAAA	ABAAA	AABAA	AAABA	introgression	DFO_stat	DFO_Pvalue	DIL_stat	DIL_Pvalue	DFI_stat	DFI_Pvalue	DOL_stat	DOL_Pvalue
I19060_6_seq1	I19067_14_seq2	I19057_3_seq1	I19057_3_seq2	BAAAA	ABAAA	AABAA	AAABA	introgression	DFO_stat	DFO_Pvalue	DIL_stat	DIL_Pvalue	DFI_stat	DFI_Pvalue	DOL_stat	DOL_Pvalue
I19060_6_seq1	I19068_16_seq1	I19057_3_seq1	I19057_3_seq2	BAAAA	ABAAA	AABAA	AAABA	introgression	DFO_stat	DFO_Pvalue	DIL_stat	DIL_Pvalue	DFI_stat	DFI_Pvalue	DOL_stat	DOL_Pvalue
I19060_6_seq1	I19068_16_seq2	I19057_3_seq1	I19057_3_seq2	BAAAA	ABAAA	AABAA	AAABA	introgression	DFO_stat	DFO_Pvalue	DIL_stat	DIL_Pvalue	DFI_stat	DFI_Pvalue	DOL_stat	DOL_Pvalue
I19060_6_seq2	I19061_7_seq1	I19057_3_seq1	I19057_3_seq2	BAAAA	ABAAA	AABAA	AAABA	introgression	DFO_stat	DFO_Pvalue	DIL_stat	DIL_Pvalue	DFI_stat	DFI_Pvalue	DOL_stat	DOL_Pvalue
I19060_6_seq2	I19061_7_seq1	I19058_4_seq1	I19059_5_seq1	781	884	661	645	none	0.102804	0.287596	0.0280374	0.7718	0.133333	0.3017	0	1
I19060_6_seq2	I19061_7_seq1	I19058_4_seq1	I19059_5_seq2	774	890	716	685	none	0.19685	0.0265282	0.228346	0.0100724	0.0322581	0.799495	0.0967742	0.44606
I19060_6_seq2	I19061_7_seq1	I19058_4_seq2	I19058_4_seq1	800	917	603	616	none	-0.088	0.325179	-0.184	0.0396687	0.142857	0.231998	-0.0285714	0.81107
I19060_6_seq2	I19061_7_seq1	I19058_4_seq2	I19059_5_seq1	774	883	710	693	none	0.030303	0.727724	-0.136364	0.117185	0.238095	0.0587817	-0.111111	0.377822
I19060_6_seq2	I19061_7_seq1	I19058_4_seq2	I19059_5_seq2	773	887	682	659	none	0.166667	0.10247	0.0625	0.540291	0.245902	0.0547881	0.0819672	0.522053
I19060_6_seq2	I19061_7_seq1	I19059_5_seq1	I19059_5_seq2	801	919	580	554	none	0.127273	0.181926	0.236364	0.013175	-0.0344828	0.792849	0.172414	0.189161
I19060_6_seq2	I19061_7_seq1	I19064_11_seq1	I19064_11_seq2	611	778	669	654	none	-0.175373	4.90346e-05	-0.0820896	0.0573662	-0.00492611	0.920933	0.118227	0.0172095
I19060_6_seq2	I19061_7_seq1	I19065_12_seq1	I19065_12_seq2	671	830	831	826	none	-0.0526316	0.271228	-0.157895	0.000964379	0.16129	0.00705833	-0.00358423	0.95226
I19060_6_seq2	I19061_7_seq1	I19066_13_seq1	I19065_12_seq1	637	785	843	924	none	-0.0412844	0.388663	0.0917431	0.0554093	-0.0176678	0.766299	0.187279	0.00162978
I19060_6_seq2	I19061_7_seq1	I19066_13_seq1	I19065_12_seq2	640	794	828	914	none	-0.0848861	0.0621023	-0.0600414	0.186987	0.0103806	0.859924	0.0519031	0.377586
I19060_6_seq2	I19061_7_seq1	I19066_13_seq2	I19065_12_seq1	622	780	917	931	none	-0.00921659	0.847737	0.124424	0.00953968	-0.0328947	0.56628	0.157895	0.00590539
I19060_6_seq2	I19061_7_seq1	I19066_13_seq2	I19065_12_seq2	635	793	875	894	none	-0.0385488	0.418214	-0.0294785	0.535885	0.0372881	0.521883	0.0508475	0.382481
I19060_6_seq2	I19061_7_seq1	I19066_13_seq2	I19066_13_seq1	686	814	724	640	none	0.0614887	0.279754	0.0420712	0.459577	0.022508	0.691416	0.00321543	0.95478
I19060_6_seq2	I19061_7_seq1	I19067_14_seq1	I19065_12_seq1	643	807	896	943	none	0.0637255	0.198027	0.137255	0.00556424	0.057971	0.335504	0.166667	0.00562503
I19060_6_seq2	I19061_7_seq1	I19067_14_seq1	I19065_12_seq2	637	809	944	995	none	0.0077821	0.859954	-0.0311284	0.480356	0.0774411	0.182009	0.010101	0.861804
I19060_6_seq2	I19061_7_seq1	I19067_14_seq1	I19066_13_seq1	664	795	901	877	none	0.102506	0.031735	0.0250569	0.599582	0.0944625	0.0979007	-0.0162866	0.775364
I19060_6_seq2	I19061_7_seq1	I19067_14_seq1	I19066_13_seq2	647	789	937	994	none	0.0660981	0.152302	-0.00639659	0.889824	0.0759878	0.168112	-0.0273556	0.619763
I19060_6_seq2	I19061_7_seq1	I19067_14_seq1	I19067_14_seq2	689	834	754	785	none	-0.0663265	0.189116	-0.0102041	0.839893	0.0714286	0.21	0.142857	0.0121715
I19060_6_seq2	I19061_7_seq1	I19067_14_seq2	I19065_12_seq1	636	802	937	957	none	0.0778689	0.0853999	0.151639	0.000808633	0.0592334	0.31563	0.184669	0.00175706
I19060_6_seq2	I19061_7_seq1	I19067_14_seq2	I19065_12_seq2	648	818	928	949	none	0.0416667	0.386476	0.00462963	0.923342	0.101449	0.091911	0.0434783	0.470101
I19060_6_seq2	I19061_7_seq1	I19067_14_seq2	I19066_13_seq1	659	795	941	891	none	0.143426	0.0013112	0.0358566	0.421756	0.148387	0.008985	-0.0258065	0.649563
I19060_6_seq2	I19061_7_seq1	I19067_14_seq2	I19066_13_seq2	648	795	915	943	none	0.112583	0.0165665	0.00662252	0.887908	0.121495	0.0294979	-0.0280374	0.615435
I19060_6_seq2	I19061_7_seq1	I19068_16_seq1	I19065_12_seq1	588	740	958	904	none	-0.00900901	0.849441	0.0540541	0.254707	0.0357143	0.550097	0.135714	0.023151
I19060_6_seq2	I19061_7_seq1	I19068_16_seq1	I19065_12_seq2	580	741	978	932	none	-0.091954	0.0356495	-0.103448	0.0181025	0.030303	0.601508	0.010101	0.861804
I19060_6_seq2	I19061_7_seq1	I19068_16_seq1	I19066_13_seq1	613	729	978	844	none	0.0128755	0.781055	-0.0472103	0.308141	0.0774411	0.182009	-0.016835	0.771717
I19060_6_seq2	I19061_7_seq1	I19068_16_seq1	I19066_13_seq2	601	722	986	928	none	-0.0311111	0.509275	-0.0755556	0.108984	0.0754717	0.17835	0.0125786	0.822517
I19060_6_seq2	I19061_7_seq1	I19068_16_seq1	I19067_14_seq1	607	750	945	830	none	-0.0837209	0.0825507	-0.0651163	0.176926	0.0264901	0.645266	0.0529801	0.357209
I19060_6_seq2	I19061_7_seq1	I19068_16_seq1	I19067_14_seq2	610	744	932	857	none	-0.1	0.0284597	-0.108333	0.0176221	0.06	0.298698	0.0466667	0.418923
I19060_6_seq2	I19061_7_seq1	I19068_16_seq2	I19065_12_seq1	597	751	940	938	123	0.126386	0.00727416	0.161863	0.00058725	0.0882353	0.14561	0.147059	0.0152934
I19060_6_seq2	I19061_7_seq1	I19068_16_seq2	I19065_12_seq2	592	761	925	913	none	0.0453564	0.329088	-0.0194384	0.675753	0.0818505	0.170043	-0.024911	0.676251
I19060_6_seq2	I19061_7_seq1	I19068_16_seq2	I19066_13_seq1	626	745	930	846	none	0.184466	0.000180933	0.0436893	0.375189	0.188811	0.00140761	-0.013986	0.813025
I19060_6_seq2	I19061_7_seq1	I19068_16_seq2	I19066_13_seq2	610	745	934	925	none	0.140741	0.00462068	0.017284	0.727966	0.134426	0.0188921	-0.0295082	0.606316
I19060_6_seq2	I19061_7_seq1	I19068_16_seq2	I19067_14_seq1	619	763	930	845	none	0.0528846	0.280749	0.0432692	0.377494	0.10274	0.0791538	0.0890411	0.128126
I19060_6_seq2	I19061_7_seq1	I19068_16_seq2	I19067_14_seq2	617	770	899	848	none	0.0330189	0.496568	-0.0141509	0.770756	0.0954064	0.108497	0.024735	0.677332
I19060_6_seq2	I19061_7_seq1	I19068_16_seq2	I19068_16_seq1	643	768	684	745	none	0.188889	0.000338483	0.133333	0.011412	0.133106	0.0227025	0.0648464	0.267003
I19060_6_seq2	I19061_7_seq2	I19057_3_seq1	I19057_3_seq2	BAAAA	ABAAA	AABAA	AAABA	introgression	DFO_stat	DFO_Pvalue	DIL_stat	DIL_Pvalue	DFI_stat	DFI_Pvalue	DOL_stat	DOL_Pvalue
I19060_6_seq2	I19061_7_seq2	I19058_4_seq1	I19059_5_seq1	820	822	657	646	none	0.12963	0.177932	0.0740741	0.441418	0.36	0.000318217	0.3	0.0026998
I19060_6_seq2	I19061_7_seq2	I19058_4_seq1	I19059_5_seq2	812	828	711	683	none	0.21875	0.0133283	-0.1875	0.0338949	0.346939	0.000593607	-0.183673	0.0690222
I19060_6_seq2	I19061_7_seq2	I19058_4_seq2	I19058_4_seq1	836	856	604	613	none	-0.0806452	0.369171	0.274194	0.00226347	-0.180952	0.0637091	0.238095	0.0146974
I19060_6_seq2	I19061_7_seq2	I19058_4_seq2	I19059_5_seq1	812	823	708	695	none	0.0461538	0.598725	0.353846	5.47264e-05	-0.176471	0.0747059	0.215686	0.0293819
I19060_6_seq2	I19061_7_seq2	I19058_4_seq2	I19059_5_seq2	833	824	676	654	none	0.1875	0.0661926	0.125	0.220671	0.131579	0.251349	0.0526316	0.646355
I19060_6_seq2	I19061_7_seq2	I19059_5_seq1	I19059_5_seq2	842	859	578	550	none	0.127273	0.181926	-0.290909	0.0022802	0.298969	0.00323473	-0.175258	0.0843315
I19060_6_seq2	I19061_7_seq2	I19064_11_seq1	I19064_11_seq2	625	751	689	653	none	-0.132948	0.00245557	-0.0250482	0.568246	0.0528634	0.260006	0.176211	0.000173628
I19060_6_seq2	I19061_7_seq2	I19065_12_seq1	I19065_12_seq2	680	792	837	826	none	-0.0462963	0.335924	-0.0324074	0.500581	0.0701754	0.194366	0.0877193	0.104757
I19060_6_seq2	I19061_7_seq2	I19066_13_seq1	I19065_12_seq1	661	739	837	920	none	-0.0228311	0.632779	0.0410959	0.389749	0.0778816	0.162906	0.165109	0.0030947
I19060_6_seq2	I19061_7_seq2	I19066_13_seq1	I19065_12_seq2	642	742	825	911	none	-0.0688935	0.131604	0.0146138	0.749091	0.0317003	0.554848	0.146974	0.00618473
I19060_6_seq2	I19061_7_seq2	I19066_13_seq2	I19065_12_seq1	651	744	929	925	none	0.0327103	0.498586	0.0654206	0.175918	0.0897833	0.106614	0.133127	0.0167302
I19060_6_seq2	I19061_7_seq2	I19066_13_seq2	I19065_12_seq2	643	755	893	894	none	0.00236407	0.961221	0.0496454	0.307228	0.0662651	0.227275	0.126506	0.0211638
I19060_6_seq2	I19061_7_seq2	I19066_13_seq2	I19066_13_seq1	716	769	729	625	none	0.095082	0.0968068	0.0360656	0.528787	0.158209	0.00378315	0.104478	0.0558436
I19060_6_seq2	I19061_7_seq2	I19067_14_seq1	I19065_12_seq1	667	768	901	933	none	0.109489	0.0264401	0.0413625	0.401723	0.173502	0.00200759	0.0851735	0.1294
I19060_6_seq2	I19061_7_seq2	I19067_14_seq1	I19065_12_seq2	645	760	954	982	none	0.0546875	0.215925	-0.0078125	0.859684	0.135593	0.0107362	0.0451977	0.395108
I19060_6_seq2	I19061_7_seq2	I19067_14_seq1	I19066_13_seq1	688	742	902	855	none	0.133929	0.00458639	-0.0178571	0.705457	0.263768	9.61908e-07	0.0666667	0.215613
I19060_6_seq2	I19061_7_seq2	I19067_14_seq1	I19066_13_seq2	674	748	937	992	none	0.0775862	0.0946707	-0.0474138	0.307101	0.2149	5.95321e-05	0.0487106	0.362828
I19060_6_seq2	I19061_7_seq2	I19067_14_seq1	I19067_14_seq2	699	780	764	765	none	0.0222222	0.654721	-0.017284	0.727966	0.175853	0.000598013	0.133858	0.00898014
I19060_6_seq2	I19061_7_seq2	I19067_14_seq2	I19065_12_seq1	644	750	929	960	none	0.0522088	0.243983	0.060241	0.178841	0.0849315	0.104672	0.0958904	0.0669538
I19060_6_seq2	I19061_7_seq2	I19067_14_seq2	I19065_12_seq2	667	755	922	948	none	0.0205011	0.667526	0.0205011	0.667526	0.166181	0.00208597	0.166181	0.00208597
I19060_6_seq2	I19061_7_seq2	I19067_14_seq2	I19066_13_seq1	665	733	932	888	none	0.100592	0.0235133	0.00591716	0.894008	0.172775	0.0007332	0.0471204	0.357071
I19060_6_seq2	I19061_7_seq2	I19067_14_seq2	I19066_13_seq2	665	744	904	959	none	0.0446429	0.344704	-0.0223214	0.636602	0.149051	0.00419405	0.0677507	0.193105
I19060_6_seq2	I19061_7_seq2	I19068_16_seq1	I19065_12_seq1	621	705	963	902	none	0.00900901	0.849441	-0.0045045	0.924382	0.14658	0.0102203	0.127036	0.0260244
I19060_6_seq2	I19061_7_seq2	I19068_16_seq1	I19065_12_seq2	597	701	993	933	none	-0.0711462	0.109511	-0.027668	0.533695	0.0563798	0.300671	0.121662	0.0255218
I19060_6_seq2	I19061_7_seq2	I19068_16_seq1	I19066_13_seq1	639	678	985	837	none	0.0175439	0.707932	-0.0307018	0.512075	0.183801	0.000991037	0.115265	0.0389099
I19060_6_seq2	I19061_7_seq2	I19068_16_seq1	I19066_13_seq2	627	684	996	943	none	-0.0473934	0.330263	-0.07109	0.144186	0.132308	0.0170693	0.101538	0.0671736
I19060_6_seq2	I19061_7_seq2	I19068_16_seq1	I19067_14_seq1	640	711	948	841	none	-0.109489	0.0264401	-0.0316302	0.521365	0.0920635	0.102266	0.193651	0.000588281
I19060_6_seq2	I19061_7_seq2	I19068_16_seq1	I19067_14_seq2	622	691	944	852	none	-0.0610526	0.183317	-0.0652632	0.154917	0.106742	0.04401	0.101124	0.0563917
I19060_6_seq2	I19061_7_seq2	I19068_16_seq2	I19065_12_seq1	629	718	940	943	none	0.112613	0.0176493	0.144144	0.00238703	0.0860927	0.134619	0.13245	0.0213498
I19060_6_seq2	I19061_7_seq2	I19068_16_seq2	I19065_12_seq2	612	716	926	914	none	0.037037	0.427491	0.0936819	0.0447424	0.0670732	0.224463	0.146341	0.00804068
I19060_6_seq2	I19061_7_seq2	I19068_16_seq2	I19066_13_seq1	643	694	930	845	none	0.153465	0.00203816	0.10396	0.0366557	0.173913	0.00180386	0.111801	0.0448347
I19060_6_seq2	I19061_7_seq2	I19068_16_seq2	I19066_13_seq2	637	704	933	943	none	0.0876289	0.0843315	0.0721649	0.155176	0.132075	0.0185106	0.113208	0.0435101
I19060_6_seq2	I19061_7_seq2	I19068_16_seq2	I19067_14_seq1	643	721	923	856	none	0.00497512	0.920542	0.104478	0.0361915	0.0778816	0.162906	0.202492	0.000285685
I19060_6_seq2	I19061_7_seq2	I19068_16_seq2	I19067_14_seq2	637	719	906	850	none	0.0480769	0.3268	0.0625	0.202396	0.0990991	0.070546	0.117117	0.0325828
I19060_6_seq2	I19061_7_seq2	I19068_16_seq2	I19068_16_seq1	674	726	683	755	none	0.15942	0.00306542	0.176812	0.00102298	0.128834	0.0200098	0.147239	0.00784954
I19060_6_seq2	I19062_8_seq1	I19057_3_seq1	I19057_3_seq2	BAAAA	ABAAA	AABAA	AAABA	introgression	DFO_stat	DFO_Pvalue	DIL_stat	DIL_Pvalue	DFI_stat	DFI_Pvalue	DOL_stat	DOL_Pvalue
I19060_6_seq2	I19062_8_seq1	I19058_4_seq1	I19059_5_seq1	813	889	648	621	none	0.107143	0.256839	0.0714286	0.449692	0.0985915	0.406116	0.0422535	0.721815
I19060_6_seq2	I19062_8_seq1	I19058_4_seq1	I19059_5_seq2	807	894	703	660	none	0.185185	0.0314243	0.214815	0.012563	0.0285714	0.81107	0.0857143	0.473289
I19060_6_seq2	I19062_8_seq1	I19058_4_seq2	I19058_4_seq1	833	918	599	637	none	-0.133333	0.144127	-0.166667	0.0678892	0.0277778	0.813664	-0.0277778	0.813664
I19060_6_seq2	I19062_8_seq1	I19058_4_seq2	I19059_5_seq1	806	885	692	679	none	-0.0140845	0.866712	-0.0704225	0.401368	0.123288	0.292171	0.0136986	0.906827
I19060_6_seq2	I19062_8_seq1	I19058_4_seq2	I19059_5_seq2	804	890	663	643	none	0.102041	0.312422	0.102041	0.312422	0.0704225	0.55292	0.0704225	0.55292
I19060_6_seq2	I19062_8_seq1	I19059_5_seq1	I19059_5_seq2	831	921	582	561	none	0.156863	0.11314	0.196078	0.0476704	-0.047619	0.705457	0.015873	0.899741
I19060_6_seq2	I19062_8_seq1	I19064_11_seq1	I19064_11_seq2	650	736	681	644	none	-0.153153	0.000308508	-0.0630631	0.137367	-0.0385488	0.418214	0.0748299	0.116083
I19060_6_seq2	I19062_8_seq1	I19065_12_seq1	I19065_12_seq2	704	845	856	810	none	-0.0157303	0.740016	-0.208989	1.0403e-05	0.216216	0.000199282	-0.0743243	0.200994
I19060_6_seq2	I19062_8_seq1	I19066_13_seq1	I19065_12_seq1	672	801	825	936	none	-0.0862069	0.0633178	0.155172	0.000830225	-0.0657895	0.251349	0.302632	1.3163e-07
I19060_6_seq2	I19062_8_seq1	I19066_13_seq1	I19065_12_seq2	674	792	844	917	none	-0.0909091	0.0431144	-0.0424242	0.345231	-0.0285714	0.61209	0.047619	0.398025
I19060_6_seq2	I19062_8_seq1	I19066_13_seq2	I19065_12_seq1	659	814	921	956	none	-0.0405405	0.392971	0.135135	0.00440677	-0.0228013	0.689517	0.23127	5.07417e-05
I19060_6_seq2	I19062_8_seq1	I19066_13_seq2	I19065_12_seq2	674	804	894	893	none	-0.0341686	0.474046	-0.0660592	0.16633	0.0592105	0.301898	0.0131579	0.818546
I19060_6_seq2	I19062_8_seq1	I19066_13_seq2	I19066_13_seq1	712	816	727	636	none	0.0778816	0.162906	-0.0155763	0.780189	0.0532544	0.327545	-0.035503	0.513941
I19060_6_seq2	I19062_8_seq1	I19067_14_seq1	I19065_12_seq1	678	816	901	957	none	0.00452489	0.924211	0.18552	9.60568e-05	0	1	0.266667	3.85962e-06
I19060_6_seq2	I19062_8_seq1	I19067_14_seq1	I19065_12_seq2	678	796	966	986	none	-0.00927644	0.829483	-0.0352505	0.413136	0.0712074	0.200632	0.0278638	0.616531
I19060_6_seq2	I19062_8_seq1	I19067_14_seq1	I19066_13_seq1	693	789	912	869	none	0.0932203	0.0428402	0.00847458	0.853923	0.0962099	0.0747765	-0.0204082	0.705457
I19060_6_seq2	I19062_8_seq1	I19067_14_seq1	I19066_13_seq2	684	794	944	988	none	0.0470348	0.298295	0.0265849	0.556613	0.0574713	0.283669	0.0287356	0.59192
I19060_6_seq2	I19062_8_seq1	I19067_14_seq1	I19067_14_seq2	717	824	765	771	none	-0.0653753	0.183986	0.0411622	0.402865	0.0352941	0.515181	0.164706	0.00238925
I19060_6_seq2	I19062_8_seq1	I19067_14_seq2	I19065_12_seq1	667	825	936	987	none	0.0322581	0.472498	0.153226	0.000643698	0.0231023	0.687581	0.221122	0.000118577
I19060_6_seq2	I19062_8_seq1	I19067_14_seq2	I19065_12_seq2	680	807	929	944	none	0.0197802	0.673079	-0.0549451	0.24119	0.133758	0.0177786	0.0254777	0.651654
I19060_6_seq2	I19062_8_seq1	I19067_14_seq2	I19066_13_seq1	683	794	942	894	none	0.136449	0.00159913	-0.0168224	0.697199	0.185185	0.000521538	-0.048433	0.364199
I19060_6_seq2	I19062_8_seq1	I19067_14_seq2	I19066_13_seq2	680	808	918	954	none	0.0967742	0.036904	-0.00645161	0.889354	0.131965	0.0148143	-0.00879765	0.870944
I19060_6_seq2	I19062_8_seq1	I19068_16_seq1	I19065_12_seq1	630	755	962	925	none	-0.0727651	0.110519	0.143451	0.00165447	-0.0610932	0.281306	0.273312	1.43625e-06
I19060_6_seq2	I19062_8_seq1	I19068_16_seq1	I19065_12_seq2	629	739	1001	935	none	-0.116364	0.00635326	-0.0509091	0.232508	-0.0273556	0.619763	0.0820669	0.136604
I19060_6_seq2	I19062_8_seq1	I19068_16_seq1	I19066_13_seq1	643	734	969	824	none	-0.008	0.858028	0	1	0.00864553	0.872055	0.0201729	0.707081
I19060_6_seq2	I19062_8_seq1	I19068_16_seq1	I19066_13_seq2	632	743	995	938	none	-0.0695652	0.135697	0.00869565	0.852052	-0.0429799	0.422014	0.0601719	0.260969
I19060_6_seq2	I19062_8_seq1	I19068_16_seq1	I19067_14_seq1	653	736	953	836	none	-0.0905263	0.0484984	-0.0315789	0.491297	0.0148368	0.78534	0.0979228	0.0722365
I19060_6_seq2	I19062_8_seq1	I19068_16_seq1	I19067_14_seq2	645	742	959	863	none	-0.119691	0.00644724	-0.023166	0.59802	-0.0117647	0.828263	0.135294	0.0126064
I19060_6_seq2	I19062_8_seq1	I19068_16_seq2	I19065_12_seq1	632	779	932	967	none	0.0909091	0.0506992	0.220779	2.08023e-06	0.0103093	0.860401	0.216495	0.000221515
I19060_6_seq2	I19062_8_seq1	I19068_16_seq2	I19065_12_seq2	638	756	921	908	none	0.0468432	0.299281	0.0101833	0.821476	0.0938511	0.0989936	0.0355987	0.531467
I19060_6_seq2	I19062_8_seq1	I19068_16_seq2	I19066_13_seq1	649	761	929	844	none	0.200935	3.22501e-05	0.0514019	0.287596	0.145511	0.00891883	-0.0526316	0.344197
I19060_6_seq2	I19062_8_seq1	I19068_16_seq2	I19066_13_seq2	638	767	924	920	none	0.147059	0.00297371	0.0686275	0.165684	0.0853659	0.122095	-0.0121951	0.825199
I19060_6_seq2	I19062_8_seq1	I19068_16_seq2	I19067_14_seq1	659	758	925	856	none	0.0639269	0.180932	0.0273973	0.566386	0.126582	0.0244378	0.0759494	0.176982
I19060_6_seq2	I19062_8_seq1	I19068_16_seq2	I19067_14_seq2	654	776	909	856	none	0.0387244	0.417156	0.0296128	0.534958	0.0819672	0.152288	0.0688525	0.229187
I19060_6_seq2	I19062_8_seq1	I19068_16_seq2	I19068_16_seq1	682	774	692	759	none	0.214854	3.02319e-05	0.0981432	0.0567025	0.132075	0.0185106	-0.00628931	0.910701
I19060_6_seq2	I19062_8_seq2	I19057_3_seq1	I19057_3_seq2	BAAAA	ABAAA	AABAA	AAABA	introgression	DFO_stat	DFO_Pvalue	DIL_stat	DIL_Pvalue	DFI_stat	DFI_Pvalue	DOL_stat	DOL_Pvalue
I19060_6_seq2	I19062_8_seq2	I19058_4_seq1	I19059_5_seq1	689	740	650	625	none	0.107143	0.256839	0.142857	0.13057	0.125	0.220671	0.166667	0.10247
I19060_6_seq2	I19062_8_seq2	I19058_4_seq1	I19059_5_seq2	685	742	705	663	none	0.182482	0.032688	-0.0948905	0.266713	0.0833333	0.414216	-0.3125	0.00219965
I19060_6_seq2	I19062_8_seq2	I19058_4_seq2	I19058_4_seq1	717	777	604	628	none	-0.0393701	0.657275	0.149606	0.0918002	-0.281553	0.00427053	-0.0485437	0.62225
I19060_6_seq2	I19062_8_seq2	I19058_4_seq2	I19059_5_seq1	685	736	699	683	none	0.00699301	0.933355	0.328671	8.48267e-05	-0.346939	0.000593607	0.122449	0.225442
I19060_6_seq2	I19062_8_seq2	I19058_4_seq2	I19059_5_seq2	710	737	668	644	none	0.131313	0.191366	0.171717	0.0875317	-0.15493	0.191736	-0.0985915	0.406116
I19060_6_seq2	I19062_8_seq2	I19059_5_seq1	I19059_5_seq2	709	767	582	560	none	0.140187	0.147029	-0.271028	0.00505456	0.106383	0.302343	-0.361702	0.000453475
I19060_6_seq2	I19062_8_seq2	I19064_11_seq1	I19064_11_seq2	584	641	698	665	none	-0.179884	4.31122e-05	0.0483559	0.271551	-0.207447	5.75732e-05	0.106383	0.0391276
I19060_6_seq2	I19062_8_seq2	I19065_12_seq1	I19065_12_seq2	602	707	846	819	none	-0.0601336	0.202589	0.0155902	0.741135	-0.0103093	0.860401	0.106529	0.0691785
I19060_6_seq2	I19062_8_seq2	I19066_13_seq1	I19065_12_seq1	592	664	848	937	none	-0.0409091	0.390828	0.0409091	0.390828	-0.0075188	0.902402	0.12782	0.0370989
I19060_6_seq2	I19062_8_seq2	I19066_13_seq1	I19065_12_seq2	563	659	848	923	none	-0.0965092	0.0331903	0.0554415	0.221146	-0.1	0.0832645	0.146667	0.0110744
I19060_6_seq2	I19062_8_seq2	I19066_13_seq2	I19065_12_seq1	585	661	931	951	none	0.00229885	0.961759	0.0804598	0.0933234	-0.0217391	0.717982	0.101449	0.091911
I19060_6_seq2	I19062_8_seq2	I19066_13_seq2	I19065_12_seq2	565	658	888	894	none	-0.0430839	0.365592	0.106576	0.0252148	-0.0805369	0.164443	0.14094	0.0149745
I19060_6_seq2	I19062_8_seq2	I19066_13_seq2	I19066_13_seq1	630	687	730	642	none	0.0798722	0.157631	0.0543131	0.336604	-0.00338983	0.953572	-0.0305085	0.600278
I19060_6_seq2	I19062_8_seq2	I19067_14_seq1	I19065_12_seq1	611	664	901	956	none	0.0158014	0.739451	0.196388	3.57288e-05	-0.107011	0.0781328	0.188192	0.00194812
I19060_6_seq2	I19062_8_seq2	I19067_14_seq1	I19065_12_seq2	578	659	961	1000	none	-0.0393996	0.363028	0.163227	0.000164305	-0.184466	0.00118437	0.165049	0.00371631
I19060_6_seq2	I19062_8_seq2	I19067_14_seq1	I19066_13_seq1	621	654	915	891	none	0.0707965	0.132285	0.146018	0.00190679	-0.0790378	0.177567	0.0378007	0.519036
I19060_6_seq2	I19062_8_seq2	I19067_14_seq1	I19066_13_seq2	610	650	946	1005	none	0.0229645	0.615244	0.0939457	0.0397726	-0.101639	0.0758888	0.00983607	0.863611
I19060_6_seq2	I19062_8_seq2	I19067_14_seq1	I19067_14_seq2	634	695	782	781	none	-0.0488432	0.335378	0.105398	0.0376373	-0.137255	0.0163512	0.0588235	0.303484
I19060_6_seq2	I19062_8_seq2	I19067_14_seq2	I19065_12_seq1	583	674	936	989	none	0.0385396	0.392154	0.0953347	0.0342791	-0.0171821	0.769442	0.0790378	0.177567
I19060_6_seq2	I19062_8_seq2	I19067_14_seq2	I19065_12_seq2	583	677	929	966	none	-0.0230415	0.631216	0.101382	0.0346807	-0.0137931	0.814296	0.172414	0.00332366
I19060_6_seq2	I19062_8_seq2	I19067_14_seq2	I19066_13_seq1	587	653	939	913	none	0.0996169	0.0228473	0.045977	0.293511	0.0455927	0.40825	-0.0395137	0.473551
I19060_6_seq2	I19062_8_seq2	I19067_14_seq2	I19066_13_seq2	590	658	914	968	none	0.0542299	0.244276	0.00650759	0.888878	0.0251572	0.653707	-0.0440252	0.432406
I19060_6_seq2	I19062_8_seq2	I19068_16_seq1	I19065_12_seq1	581	621	978	930	none	-0.0457516	0.326989	0.119826	0.0102529	-0.0895522	0.142639	0.19403	0.00149112
I19060_6_seq2	I19062_8_seq2	I19068_16_seq1	I19065_12_seq2	546	617	1010	950	none	-0.12334	0.00463383	0.0815939	0.0610533	-0.189542	0.000914338	0.163399	0.00425904
I19060_6_seq2	I19062_8_seq2	I19068_16_seq1	I19066_13_seq1	586	611	996	852	none	-0.0219298	0.639575	0.0614035	0.189783	-0.118881	0.0443823	0.013986	0.813025
I19060_6_seq2	I19062_8_seq2	I19068_16_seq1	I19066_13_seq2	582	602	1013	950	none	-0.081448	0.086833	0.0135747	0.775345	-0.111111	0.0555111	0.030303	0.601508
I19060_6_seq2	I19062_8_seq2	I19068_16_seq1	I19067_14_seq1	600	611	967	845	none	-0.0897155	0.0551238	-0.0722101	0.122667	-0.0482759	0.411015	-0.0206897	0.724589
I19060_6_seq2	I19062_8_seq2	I19068_16_seq1	I19067_14_seq2	570	615	973	870	none	-0.108434	0.0155291	0.0240964	0.590761	-0.132075	0.0185106	0.0754717	0.17835
I19060_6_seq2	I19062_8_seq2	I19068_16_seq2	I19065_12_seq1	568	635	943	964	123	0.122271	0.00887822	0.135371	0.00376666	0.0553506	0.362198	0.0774908	0.202076
I19060_6_seq2	I19062_8_seq2	I19068_16_seq2	I19065_12_seq2	552	635	935	927	none	0.0408602	0.378262	0.113978	0.0139785	-0.00348432	0.95293	0.114983	0.0514235
I19060_6_seq2	I19062_8_seq2	I19068_16_seq2	I19066_13_seq1	584	627	943	859	none	0.195122	7.78519e-05	0.0878049	0.0754181	0.103203	0.0836312	-0.0533808	0.370881
I19060_6_seq2	I19062_8_seq2	I19068_16_seq2	I19066_13_seq2	577	631	941	936	none	0.143603	0.00494848	0.0391645	0.4434	0.0459364	0.439659	-0.0954064	0.108497
I19060_6_seq2	I19062_8_seq2	I19068_16_seq2	I19067_14_seq1	595	636	949	869	none	0.0795181	0.105252	-0.0698795	0.154576	0.0942029	0.117579	-0.130435	0.030239
I19060_6_seq2	I19062_8_seq2	I19068_16_seq2	I19067_14_seq2	574	643	924	859	none	0.0601852	0.210962	0.037037	0.441418	0.0273973	0.639667	-0.00684932	0.906827
I19060_6_seq2	I19062_8_seq2	I19068_16_seq2	I19068_16_seq1	623	659	709	783	none	0.245614	5.56702e-06	0.0409357	0.44903	0.125	0.0392503	-0.132353	0.029049
I19060_6_seq2	I19065_12_seq1	I19057_3_seq1	I19057_3_seq2	BAAAA	ABAAA	AABAA	AAABA	introgression	DFO_stat	DFO_Pvalue	DIL_stat	DIL_Pvalue	DFI_stat	DFI_Pvalue	DOL_stat	DOL_Pvalue
I19060_6_seq2	I19065_12_seq2	I19057_3_seq1	I19057_3_seq2	BAAAA	ABAAA	AABAA	AAABA	introgression	DFO_stat	DFO_Pvalue	DIL_stat	DIL_Pvalue	DFI_stat	DFI_Pvalue	DOL_stat	DOL_Pvalue
I19060_6_seq2	I19066_13_seq1	I19057_3_seq1	I19057_3_seq2	BAAAA	ABAAA	AABAA	AAABA	introgression	DFO_stat	DFO_Pvalue	DIL_stat	DIL_Pvalue	DFI_stat	DFI_Pvalue	DOL_stat	DOL_Pvalue
I19060_6_seq2	I19066_13_seq2	I19057_3_seq1	I19057_3_seq2	BAAAA	ABAAA	AABAA	AAABA	introgression	DFO_stat	DFO_Pvalue	DIL_stat	DIL_Pvalue	DFI_stat	DFI_Pvalue	DOL_stat	DOL_Pvalue
I19060_6_seq2	I19067_14_seq1	I19057_3_seq1	I19057_3_seq2	BAAAA	ABAAA	AABAA	AAABA	introgression	DFO_stat	DFO_Pvalue	DIL_stat	DIL_Pvalue	DFI_stat	DFI_Pvalue	DOL_stat	DOL_Pvalue
I19060_6_seq2	I19067_14_seq2	I19057_3_seq1	I19057_3_seq2	BAAAA	ABAAA	AABAA	AAABA	introgression	DFO_stat	DFO_Pvalue	DIL_stat	DIL_Pvalue	DFI_stat	DFI_Pvalue	DOL_stat	DOL_Pvalue
I19060_6_seq2	I19068_16_seq1	I19057_3_seq1	I19057_3_seq2	BAAAA	ABAAA	AABAA	AAABA	introgression	DFO_stat	DFO_Pvalue	DIL_stat	DIL_Pvalue	DFI_stat	DFI_Pvalue	DOL_stat	DOL_Pvalue
I19060_6_seq2	I19068_16_seq2	I19057_3_seq1	I19057_3_seq2	BAAAA	ABAAA	AABAA	AAABA	introgression	DFO_stat	DFO_Pvalue	DIL_stat	DIL_Pvalue	DFI_stat	DFI_Pvalue	DOL_stat	DOL_Pvalue
I19061_7_seq1	I19061_7_seq2	I19057_3_seq1	I19057_3_seq2	BAAAA	ABAAA	AABAA	AAABA	introgression	DFO_stat	DFO_Pvalue	DIL_stat	DIL_Pvalue	DFI_stat	DFI_Pvalue	DOL_stat	DOL_Pvalue
I19061_7_seq1	I19061_7_seq2	I19058_4_seq1	I19059_5_seq1	740	651	701	658	none	0.119266	0.213068	0.137615	0.150792	0.304348	0.00350929	0.326087	0.0017617
I19061_7_seq1	I19061_7_seq2	I19058_4_seq1	I19059_5_seq2	743	655	749	712	none	0.264	0.00316122	-0.184	0.0396687	0.363636	0.000646749	-0.272727	0.0105152
I19061_7_seq1	I19061_7_seq2	I19058_4_seq2	I19058_4_seq1	766	678	625	630	none	-0.186992	0.0380942	0.284553	0.00160035	-0.319149	0.00197302	0.297872	0.00387725
I19061_7_seq1	I19061_7_seq2	I19058_4_seq2	I19059_5_seq1	734	648	756	707	none	-0.0708661	0.42451	0.433071	1.05838e-06	-0.354167	0.000520244	0.3125	0.00219965
I19061_7_seq1	I19061_7_seq2	I19058_4_seq2	I19059_5_seq2	764	653	716	681	none	0.0967742	0.350688	0.16129	0.119844	-0.09375	0.453255	0	1
I19061_7_seq1	I19061_7_seq2	I19059_5_seq1	I19059_5_seq2	765	674	585	578	none	0.175439	0.0610447	-0.333333	0.000372233	0.319149	0.00197302	-0.297872	0.00387725
I19061_7_seq1	I19061_7_seq2	I19064_11_seq1	I19064_11_seq2	605	580	713	686	none	-0.0567515	0.199533	-0.072407	0.101676	0.0842105	0.10068	0.0631579	0.218258
I19061_7_seq1	I19061_7_seq2	I19065_12_seq1	I19065_12_seq2	658	613	874	835	none	-0.116173	0.014929	-0.0159453	0.73831	-0.0849673	0.137194	0.0588235	0.303484
I19061_7_seq1	I19061_7_seq2	I19066_13_seq1	I19065_12_seq1	651	581	844	968	none	0.0809628	0.0834898	-0.00218818	0.96269	0.0983051	0.0913258	-0.0305085	0.600278
I19061_7_seq1	I19061_7_seq2	I19066_13_seq1	I19065_12_seq2	639	585	847	946	none	-0.0350515	0.440156	-0.00206186	0.963782	0.0223642	0.692353	0.0734824	0.193588
I19061_7_seq1	I19061_7_seq2	I19066_13_seq2	I19065_12_seq1	652	585	951	980	none	0.129032	0.00718629	0.0138249	0.77334	0.124138	0.0345159	-0.0482759	0.411015
I19061_7_seq1	I19061_7_seq2	I19066_13_seq2	I19065_12_seq2	642	595	918	924	none	0.0138249	0.77334	0.0276498	0.564603	0.0301003	0.602727	0.0501672	0.385683
I19061_7_seq1	I19061_7_seq2	I19066_13_seq2	I19066_13_seq1	679	609	748	637	none	0.0645161	0.255989	0.0322581	0.570061	0.131034	0.0256522	0.0965517	0.100131
I19061_7_seq1	I19061_7_seq2	I19067_14_seq1	I19065_12_seq1	653	593	938	976	none	0.125891	0.00979277	-0.0118765	0.807475	0.107266	0.0682232	-0.0934256	0.112233
I19061_7_seq1	I19061_7_seq2	I19067_14_seq1	I19065_12_seq2	634	580	996	1016	none	0	1	-0.03861	0.379537	0.0577508	0.294867	-0.00303951	0.956033
I19061_7_seq1	I19061_7_seq2	I19067_14_seq1	I19066_13_seq1	653	582	945	874	none	0.0386266	0.404375	-0.0214592	0.643192	0.163399	0.00425904	0.0718954	0.208516
I19061_7_seq1	I19061_7_seq2	I19067_14_seq1	I19066_13_seq2	646	582	983	1019	none	0.00420168	0.92696	-0.0378151	0.409355	0.125402	0.0270021	0.0610932	0.281306
I19061_7_seq1	I19061_7_seq2	I19067_14_seq1	I19067_14_seq2	654	599	781	787	none	0.0432692	0.377494	-0.0288462	0.556298	0.105105	0.0551125	0.015015	0.784086
I19061_7_seq1	I19061_7_seq2	I19067_14_seq2	I19065_12_seq1	629	574	967	1014	none	0.0923077	0.0352966	0.0153846	0.725721	0.0328358	0.547844	-0.0865672	0.113094
I19061_7_seq1	I19061_7_seq2	I19067_14_seq2	I19065_12_seq2	655	577	965	980	none	-0.0153173	0.74333	-0.0109409	0.81507	0.086262	0.126977	0.0926518	0.101176
I19061_7_seq1	I19061_7_seq2	I19067_14_seq2	I19066_13_seq1	633	573	980	908	none	0	1	0.0114943	0.792849	0.0326409	0.549034	0.0504451	0.354421
I19061_7_seq1	I19061_7_seq2	I19067_14_seq2	I19066_13_seq2	637	576	951	984	none	-0.034632	0.456642	-0.004329	0.925865	0.0273556	0.619763	0.0699088	0.204787
I19061_7_seq1	I19061_7_seq2	I19068_16_seq1	I19065_12_seq1	613	549	991	944	none	0.0803571	0.088973	-0.00892857	0.850107	0.117438	0.0489973	-0.024911	0.676251
I19061_7_seq1	I19061_7_seq2	I19068_16_seq1	I19065_12_seq2	598	544	1035	962	none	-0.0616302	0.166904	-0.0258449	0.562157	0.025974	0.648503	0.0844156	0.138477
I19061_7_seq1	I19061_7_seq2	I19068_16_seq1	I19066_13_seq1	611	537	1010	842	none	-0.0294118	0.521075	-0.012605	0.783309	0.0983051	0.0913258	0.125424	0.0312227
I19061_7_seq1	I19061_7_seq2	I19068_16_seq1	I19066_13_seq2	604	542	1023	960	none	-0.0672646	0.15545	-0.0493274	0.297537	0.043771	0.450647	0.0707071	0.223017
I19061_7_seq1	I19061_7_seq2	I19068_16_seq1	I19067_14_seq1	618	551	982	879	none	-0.0750605	0.127157	-0.0363196	0.460453	0.0666667	0.260393	0.122807	0.0381517
I19061_7_seq1	I19061_7_seq2	I19068_16_seq1	I19067_14_seq2	593	535	975	885	none	-0.0534979	0.238245	-0.0452675	0.318308	0.0461538	0.405381	0.0584615	0.291915
I19061_7_seq1	I19061_7_seq2	I19068_16_seq2	I19065_12_seq1	615	554	961	983	123	0.142232	0.00236129	0.137856	0.00320857	-0.0142857	0.81107	-0.0214286	0.719918
I19061_7_seq1	I19061_7_seq2	I19068_16_seq2	I19065_12_seq2	609	548	958	936	none	-0.00440529	0.925217	0.105727	0.0242748	-0.0232558	0.6866	0.142857	0.0131944
I19061_7_seq1	I19061_7_seq2	I19068_16_seq2	I19066_13_seq1	609	545	951	844	none	0.0372093	0.440358	0.125581	0.00921129	-0.016835	0.771717	0.111111	0.0555111
I19061_7_seq1	I19061_7_seq2	I19068_16_seq2	I19066_13_seq2	610	545	957	954	none	0	1	0.101942	0.0385281	-0.0202703	0.727282	0.121622	0.0363976
I19061_7_seq1	I19061_7_seq2	I19068_16_seq2	I19067_14_seq1	611	551	945	889	none	0.00480769	0.921886	0.100962	0.0394732	-0.0375427	0.520466	0.0989761	0.0902276
I19061_7_seq1	I19061_7_seq2	I19068_16_seq2	I19067_14_seq2	603	541	929	882	none	0.0114943	0.810538	0.0804598	0.0933234	-0.0127389	0.821409	0.0828025	0.142304
I19061_7_seq1	I19061_7_seq2	I19068_16_seq2	I19068_16_seq1	636	569	700	776	none	0.0934844	0.079018	0.172805	0.0011675	-0.0141844	0.811729	0.0851064	0.152953
I19061_7_seq1	I19065_12_seq1	I19057_3_seq1	I19057_3_seq2	BAAAA	ABAAA	AABAA	AAABA	introgression	DFO_stat	DFO_Pvalue	DIL_stat	DIL_Pvalue	DFI_stat	DFI_Pvalue	DOL_stat	DOL_Pvalue
I19061_7_seq1	I19065_12_seq2	I19057_3_seq1	I19057_3_seq2	BAAAA	ABAAA	AABAA	AAABA	introgression	DFO_stat	DFO_Pvalue	DIL_stat	DIL_Pvalue	DFI_stat	DFI_Pvalue	DOL_stat	DOL_Pvalue
I19061_7_seq1	I19066_13_seq1	I19057_3_seq1	I19057_3_seq2	BAAAA	ABAAA	AABAA	AAABA	introgression	DFO_stat	DFO_Pvalue	DIL_stat	DIL_Pvalue	DFI_stat	DFI_Pvalue	DOL_stat	DOL_Pvalue
I19061_7_seq1	I19066_13_seq2	I19057_3_seq1	I19057_3_seq2	BAAAA	ABAAA	AABAA	AAABA	introgression	DFO_stat	DFO_Pvalue	DIL_stat	DIL_Pvalue	DFI_stat	DFI_Pvalue	DOL_stat	DOL_Pvalue
I19061_7_seq1	I19067_14_seq1	I19057_3_seq1	I19057_3_seq2	BAAAA	ABAAA	AABAA	AAABA	introgression	DFO_stat	DFO_Pvalue	DIL_stat	DIL_Pvalue	DFI_stat	DFI_Pvalue	DOL_stat	DOL_Pvalue
I19061_7_seq1	I19067_14_seq2	I19057_3_seq1	I19057_3_seq2	BAAAA	ABAAA	AABAA	AAABA	introgression	DFO_stat	DFO_Pvalue	DIL_stat	DIL_Pvalue	DFI_stat	DFI_Pvalue	DOL_stat	DOL_Pvalue
I19061_7_seq1	I19068_16_seq1	I19057_3_seq1	I19057_3_seq2	BAAAA	ABAAA	AABAA	AAABA	introgression	DFO_stat	DFO_Pvalue	DIL_stat	DIL_Pvalue	DFI_stat	DFI_Pvalue	DOL_stat	DOL_Pvalue
I19061_7_seq1	I19068_16_seq2	I19057_3_seq1	I19057_3_seq2	BAAAA	ABAAA	AABAA	AAABA	introgression	DFO_stat	DFO_Pvalue	DIL_stat	DIL_Pvalue	DFI_stat	DFI_Pvalue	DOL_stat	DOL_Pvalue
I19061_7_seq2	I19065_12_seq1	I19057_3_seq1	I19057_3_seq2	BAAAA	ABAAA	AABAA	AAABA	introgression	DFO_stat	DFO_Pvalue	DIL_stat	DIL_Pvalue	DFI_stat	DFI_Pvalue	DOL_stat	DOL_Pvalue
I19061_7_seq2	I19065_12_seq2	I19057_3_seq1	I19057_3_seq2	BAAAA	ABAAA	AABAA	AAABA	introgression	DFO_stat	DFO_Pvalue	DIL_stat	DIL_Pvalue	DFI_stat	DFI_Pvalue	DOL_stat	DOL_Pvalue
I19061_7_seq2	I19066_13_seq1	I19057_3_seq1	I19057_3_seq2	BAAAA	ABAAA	AABAA	AAABA	introgression	DFO_stat	DFO_Pvalue	DIL_stat	DIL_Pvalue	DFI_stat	DFI_Pvalue	DOL_stat	DOL_Pvalue
I19061_7_seq2	I19066_13_seq2	I19057_3_seq1	I19057_3_seq2	BAAAA	ABAAA	AABAA	AAABA	introgression	DFO_stat	DFO_Pvalue	DIL_stat	DIL_Pvalue	DFI_stat	DFI_Pvalue	DOL_stat	DOL_Pvalue
I19061_7_seq2	I19067_14_seq1	I19057_3_seq1	I19057_3_seq2	BAAAA	ABAAA	AABAA	AAABA	introgression	DFO_stat	DFO_Pvalue	DIL_stat	DIL_Pvalue	DFI_stat	DFI_Pvalue	DOL_stat	DOL_Pvalue
I19061_7_seq2	I19067_14_seq2	I19057_3_seq1	I19057_3_seq2	BAAAA	ABAAA	AABAA	AAABA	introgression	DFO_stat	DFO_Pvalue	DIL_stat	DIL_Pvalue	DFI_stat	DFI_Pvalue	DOL_stat	DOL_Pvalue
I19061_7_seq2	I19068_16_seq1	I19057_3_seq1	I19057_3_seq2	BAAAA	ABAAA	AABAA	AAABA	introgression	DFO_stat	DFO_Pvalue	DIL_stat	DIL_Pvalue	DFI_stat	DFI_Pvalue	DOL_stat	DOL_Pvalue
I19061_7_seq2	I19068_16_seq2	I19057_3_seq1	I19057_3_seq2	BAAAA	ABAAA	AABAA	AAABA	introgression	DFO_stat	DFO_Pvalue	DIL_stat	DIL_Pvalue	DFI_stat	DFI_Pvalue	DOL_stat	DOL_Pvalue
I19062_8_seq1	I19061_7_seq1	I19057_3_seq1	I19057_3_seq2	BAAAA	ABAAA	AABAA	AAABA	introgression	DFO_stat	DFO_Pvalue	DIL_stat	DIL_Pvalue	DFI_stat	DFI_Pvalue	DOL_stat	DOL_Pvalue
I19062_8_seq1	I19061_7_seq1	I19058_4_seq1	I19059_5_seq1	822	820	675	618	none	0.135135	0.154523	0.0630631	0.506428	0.0684932	0.558409	-0.0410959	0.725496
I19062_8_seq1	I19061_7_seq1	I19058_4_seq1	I19059_5_seq2	825	824	728	675	none	0.227273	0.00902344	0.212121	0.0148061	0.0555556	0.637352	0.0277778	0.813664
I19062_8_seq1	I19061_7_seq1	I19058_4_seq2	I19058_4_seq1	851	861	600	620	none	-0.130435	0.161886	-0.252174	0.00684559	0.166667	0.157299	-0.0277778	0.813664
I19062_8_seq1	I19061_7_seq1	I19058_4_seq2	I19059_5_seq1	818	819	714	664	none	0.00719424	0.932405	-0.136691	0.107058	0.142857	0.21	-0.116883	0.305059
I19062_8_seq1	I19061_7_seq1	I19058_4_seq2	I19059_5_seq2	824	823	680	643	none	0.154639	0.127754	0.0103093	0.919126	0.205479	0.0791538	0.0136986	0.906827
I19062_8_seq1	I19061_7_seq1	I19059_5_seq1	I19059_5_seq2	850	854	572	569	none	0.132075	0.173893	0.226415	0.0197488	0.0294118	0.808365	0.176471	0.14561
I19062_8_seq1	I19061_7_seq1	I19064_11_seq1	I19064_11_seq2	676	738	675	655	none	-0.0786948	0.0724559	-0.0786948	0.0724559	0.0418848	0.412997	0.0418848	0.412997
I19062_8_seq1	I19061_7_seq1	I19065_12_seq1	I19065_12_seq2	752	752	854	803	none	-0.183962	0.000151856	-0.0801887	0.0987006	-0.0573248	0.309725	0.0828025	0.142304
I19062_8_seq1	I19061_7_seq1	I19066_13_seq1	I19065_12_seq1	714	707	818	946	none	0.0889371	0.0561898	0.00650759	0.888878	0.0239521	0.661574	-0.0898204	0.100688
I19062_8_seq1	I19061_7_seq1	I19066_13_seq1	I19065_12_seq2	709	720	832	917	none	-0.077551	0.0860404	-0.0612245	0.175334	0.0149254	0.784715	0.038806	0.477539
I19062_8_seq1	I19061_7_seq1	I19066_13_seq2	I19065_12_seq1	734	709	930	968	none	0.0787589	0.106928	0.0548926	0.261173	-0.0125	0.823063	-0.04375	0.433848
I19062_8_seq1	I19061_7_seq1	I19066_13_seq2	I19065_12_seq2	722	725	895	891	none	-0.0909091	0.0565303	-0.0181818	0.702918	-0.0340557	0.5405	0.0650155	0.242617
I19062_8_seq1	I19061_7_seq1	I19066_13_seq2	I19066_13_seq1	747	746	738	634	none	0.00649351	0.909269	0.0649351	0.254451	-0.0359281	0.511431	0.0179641	0.742681
I19062_8_seq1	I19061_7_seq1	I19067_14_seq1	I19065_12_seq1	736	734	902	937	none	0.181395	0.000168901	0.0883721	0.0668736	0.0584416	0.305059	-0.0714286	0.21
I19062_8_seq1	I19061_7_seq1	I19067_14_seq1	I19065_12_seq2	716	745	970	976	none	-0.0134357	0.75909	-0.00191939	0.965055	0	1	0.0185185	0.738883
I19062_8_seq1	I19061_7_seq1	I19067_14_seq1	I19066_13_seq1	719	728	921	854	none	0.0638298	0.166421	0.0723404	0.11681	-0.0176471	0.744882	-0.00588235	0.913627
I19062_8_seq1	I19061_7_seq1	I19067_14_seq1	I19066_13_seq2	727	728	959	993	none	0.0711297	0.119917	0.0334728	0.464277	0.00884956	0.870568	-0.0442478	0.415251
I19062_8_seq1	I19061_7_seq1	I19067_14_seq1	I19067_14_seq2	762	776	752	776	none	-0.00248139	0.960271	-0.00248139	0.960271	0.0193548	0.733271	0.0193548	0.733271
I19062_8_seq1	I19061_7_seq1	I19067_14_seq2	I19065_12_seq1	740	732	947	979	none	0.161943	0.000318989	0.101215	0.0244739	0.0584416	0.305059	-0.038961	0.494125
I19062_8_seq1	I19061_7_seq1	I19067_14_seq2	I19065_12_seq2	728	755	950	941	none	-0.00892857	0.850107	0.0223214	0.636602	-0.00990099	0.863166	0.0363036	0.52743
I19062_8_seq1	I19061_7_seq1	I19067_14_seq2	I19066_13_seq1	715	724	961	874	none	0.0619137	0.152893	0.065666	0.129515	-0.00864553	0.872055	-0.00288184	0.957188
I19062_8_seq1	I19061_7_seq1	I19067_14_seq2	I19066_13_seq2	734	734	942	953	none	0.08	0.089686	0.04	0.396144	0.0184049	0.739656	-0.0368098	0.506295
I19062_8_seq1	I19061_7_seq1	I19068_16_seq1	I19065_12_seq1	681	682	950	918	none	0.133183	0.00506023	0.0428894	0.366676	0.0408163	0.484018	-0.0952381	0.10247
I19062_8_seq1	I19061_7_seq1	I19068_16_seq1	I19065_12_seq2	661	687	991	922	none	-0.0489237	0.268755	-0.0606654	0.170263	0.00645161	0.909561	-0.0129032	0.82028
I19062_8_seq1	I19061_7_seq1	I19068_16_seq1	I19066_13_seq1	666	670	967	821	none	0.0393375	0.387297	0.00621118	0.891422	0.00617284	0.911528	-0.0432099	0.4367
I19062_8_seq1	I19061_7_seq1	I19068_16_seq1	I19066_13_seq2	684	671	984	944	none	0.0319635	0.50353	-0.0410959	0.389749	0.0610932	0.281306	-0.0418006	0.461024
I19062_8_seq1	I19061_7_seq1	I19068_16_seq1	I19067_14_seq1	676	710	936	840	none	-0.0612245	0.198543	-0.0702948	0.139893	-0.0533333	0.355611	-0.0666667	0.248213
I19062_8_seq1	I19061_7_seq1	I19068_16_seq1	I19067_14_seq2	682	697	930	866	none	-0.0590631	0.190618	-0.0916497	0.0422731	0.00657895	0.908677	-0.0460526	0.422001
I19062_8_seq1	I19061_7_seq1	I19068_16_seq2	I19065_12_seq1	689	676	929	953	123	0.189931	7.17435e-05	0.139588	0.00352255	0.0446735	0.446016	-0.0309278	0.597784
I19062_8_seq1	I19061_7_seq1	I19068_16_seq2	I19065_12_seq2	664	695	926	893	none	0	1	0.0218341	0.640307	-0.042623	0.456648	-0.00983607	0.863611
I19062_8_seq1	I19061_7_seq1	I19068_16_seq2	I19066_13_seq1	679	669	928	822	none	0.0892019	0.065606	0.107981	0.0258334	-0.00946372	0.866192	0.0157729	0.778842
I19062_8_seq1	I19061_7_seq1	I19068_16_seq2	I19066_13_seq2	689	676	937	928	none	0.0936709	0.0626493	0.0683544	0.1743	0.00653595	0.908974	-0.0261438	0.647434
I19062_8_seq1	I19061_7_seq1	I19068_16_seq2	I19067_14_seq1	687	708	923	854	none	-0.0142857	0.769698	0.0285714	0.558185	-0.0684932	0.241835	-0.00684932	0.906827
I19062_8_seq1	I19061_7_seq1	I19068_16_seq2	I19067_14_seq2	690	704	903	860	none	-0.0232558	0.629633	-0.00465116	0.923164	-0.0410959	0.482525	-0.0136986	0.814921
I19062_8_seq1	I19061_7_seq1	I19068_16_seq2	I19068_16_seq1	705	718	685	736	none	0.0769231	0.142213	0.115385	0.0277078	-0.0272109	0.640808	0.0204082	0.726393
I19062_8_seq1	I19061_7_seq2	I19057_3_seq1	I19057_3_seq2	BAAAA	ABAAA	AABAA	AAABA	introgression	DFO_stat	DFO_Pvalue	DIL_stat	DIL_Pvalue	DFI_stat	DFI_Pvalue	DOL_stat	DOL_Pvalue
I19062_8_seq1	I19061_7_seq2	I19058_4_seq1	I19059_5_seq1	854	767	671	620	none	0.125	0.185877	0.0892857	0.344704	0.275862	0.00296711	0.241379	0.00932958
I19062_8_seq1	I19061_7_seq2	I19058_4_seq1	I19059_5_seq2	860	776	724	676	none	0.218045	0.0119161	-0.203008	0.019222	0.315315	0.000893577	-0.189189	0.0462361
I19062_8_seq1	I19061_7_seq2	I19058_4_seq2	I19058_4_seq1	879	802	601	618	none	-0.155172	0.0946707	0.275862	0.00296711	-0.179487	0.0522036	0.247863	0.00733913
I19062_8_seq1	I19061_7_seq2	I19058_4_seq2	I19059_5_seq1	850	769	715	670	none	-0.0222222	0.796253	0.333333	0.000107511	-0.213675	0.020819	0.196581	0.0334741
I19062_8_seq1	I19061_7_seq2	I19058_4_seq2	I19059_5_seq2	881	774	677	643	none	0.115789	0.259077	0.0736842	0.472643	0.0681818	0.522431	0.0227273	0.83117
I19062_8_seq1	I19061_7_seq2	I19059_5_seq1	I19059_5_seq2	890	806	573	569	none	0.137255	0.165684	-0.333333	0.000761281	0.320388	0.00114763	-0.145631	0.139409
I19062_8_seq1	I19061_7_seq2	I19064_11_seq1	I19064_11_seq2	687	694	671	654	none	-0.0664137	0.127353	-0.0891841	0.0406235	0.107692	0.0216099	0.0813187	0.082814
I19062_8_seq1	I19061_7_seq2	I19065_12_seq1	I19065_12_seq2	775	717	863	801	none	-0.166667	0.000636299	0.0380952	0.434967	-0.110482	0.0379161	0.133144	0.0123648
I19062_8_seq1	I19061_7_seq2	I19066_13_seq1	I19065_12_seq1	765	675	814	946	none	0.0980392	0.0356919	-0.0457516	0.326989	0.100592	0.0644064	-0.0946746	0.0817589
I19062_8_seq1	I19061_7_seq2	I19066_13_seq1	I19065_12_seq2	741	685	837	918	none	-0.0588235	0.19936	0.00840336	0.854531	0.0223464	0.672432	0.111732	0.0345097
I19062_8_seq1	I19061_7_seq2	I19066_13_seq2	I19065_12_seq1	781	678	934	966	none	0.102625	0.0356684	-0.0214797	0.66017	0.0920245	0.0966038	-0.0674847	0.223046
I19062_8_seq1	I19061_7_seq2	I19066_13_seq2	I19065_12_seq2	748	691	908	892	none	-0.0582751	0.227428	0.044289	0.35897	-0.00854701	0.87278	0.116809	0.0286392
I19062_8_seq1	I19061_7_seq2	I19066_13_seq2	I19066_13_seq1	797	710	744	626	none	0.0232558	0.6866	0.0431894	0.453672	0.0783133	0.153599	0.0963855	0.0790495
I19062_8_seq1	I19061_7_seq2	I19067_14_seq1	I19065_12_seq1	774	699	905	945	none	0.192399	7.89061e-05	-0.0356295	0.464745	0.153374	0.00561866	-0.141104	0.0108434
I19062_8_seq1	I19061_7_seq2	I19067_14_seq1	I19065_12_seq2	733	694	973	972	none	0.00959693	0.826608	-0.00575816	0.895433	0.0534759	0.301054	0.0320856	0.534925
I19062_8_seq1	I19061_7_seq2	I19067_14_seq1	I19066_13_seq1	762	684	916	846	none	0.0700637	0.12837	0.014862	0.747041	0.133903	0.0121185	0.0598291	0.262332
I19062_8_seq1	I19061_7_seq2	I19067_14_seq1	I19066_13_seq2	768	691	958	999	none	0.0683761	0.139087	-0.017094	0.711531	0.130435	0.0154049	0.0144928	0.787783
I19062_8_seq1	I19061_7_seq2	I19067_14_seq1	I19067_14_seq2	774	715	762	760	none	0.0679612	0.167753	-0.00485437	0.921509	0.114667	0.0263841	0.0346667	0.502019
I19062_8_seq1	I19061_7_seq2	I19067_14_seq2	I19065_12_seq1	752	672	926	985	none	0.112403	0.0106705	-0.0193798	0.659774	0.0837696	0.101576	-0.0942408	0.0654868
I19062_8_seq1	I19061_7_seq2	I19067_14_seq2	I19065_12_seq2	752	683	931	938	none	-0.0423729	0.357273	0.00423729	0.926652	0.0666667	0.196706	0.125333	0.0152213
I19062_8_seq1	I19061_7_seq2	I19067_14_seq2	I19066_13_seq1	739	668	944	881	none	0.00931099	0.82917	0.0204842	0.635011	0.0277078	0.580898	0.0428212	0.393545
I19062_8_seq1	I19061_7_seq2	I19067_14_seq2	I19066_13_seq2	752	672	916	961	none	0.0042735	0.92634	-0.0042735	0.92634	0.0493506	0.33288	0.038961	0.444587
I19062_8_seq1	I19061_7_seq2	I19068_16_seq1	I19065_12_seq1	721	646	940	923	none	0.112088	0.0168064	-0.0681319	0.14614	0.151515	0.00591585	-0.0969697	0.0781467
I19062_8_seq1	I19061_7_seq2	I19068_16_seq1	I19065_12_seq2	683	641	987	922	none	-0.0481696	0.272476	-0.0327553	0.455536	0.0455764	0.378737	0.0670241	0.19551
I19062_8_seq1	I19061_7_seq2	I19068_16_seq1	I19066_13_seq1	711	625	956	819	none	0.0163934	0.717245	-0.0245902	0.586982	0.114286	0.0325094	0.0571429	0.285049
I19062_8_seq1	I19061_7_seq2	I19068_16_seq1	I19066_13_seq2	717	627	974	951	none	0	1	-0.0727273	0.127124	0.118841	0.0272885	0.026087	0.628
I19062_8_seq1	I19061_7_seq2	I19068_16_seq1	I19067_14_seq1	705	656	926	840	none	-0.0762332	0.10741	-0.0493274	0.297537	0.0235294	0.664389	0.0588235	0.278076
I19062_8_seq1	I19061_7_seq2	I19068_16_seq1	I19067_14_seq2	692	632	929	854	none	-0.025641	0.563703	-0.0493097	0.266875	0.0520833	0.307434	0.0208333	0.683091
I19062_8_seq1	I19061_7_seq2	I19068_16_seq2	I19065_12_seq1	737	650	921	960	none	0.159817	0.000823629	0.100457	0.0355181	0.0448718	0.428014	-0.0384615	0.496906
I19062_8_seq1	I19061_7_seq2	I19068_16_seq2	I19065_12_seq2	700	655	918	890	none	-0.010661	0.817409	0.113006	0.0143926	-0.0397727	0.455545	0.125	0.0190165
I19062_8_seq1	I19061_7_seq2	I19068_16_seq2	I19066_13_seq1	730	640	923	827	none	0.0551559	0.260032	0.141487	0.00386171	-0.00307692	0.955764	0.107692	0.0522036
I19062_8_seq1	I19061_7_seq2	I19068_16_seq2	I19066_13_seq2	736	643	927	937	none	0.0454545	0.365712	0.106061	0.0348085	0.0125	0.823063	0.0875	0.117525
I19062_8_seq1	I19061_7_seq2	I19068_16_seq2	I19067_14_seq1	721	665	916	856	none	-0.0361446	0.461535	0.103614	0.0347906	-0.0807453	0.147359	0.0993789	0.0745391
I19062_8_seq1	I19061_7_seq2	I19068_16_seq2	I19067_14_seq2	715	648	902	850	none	0.00226757	0.96202	0.0929705	0.050893	-0.0340909	0.522431	0.0795455	0.135593
I19062_8_seq1	I19061_7_seq2	I19068_16_seq2	I19068_16_seq1	738	668	684	733	none	0.0718232	0.171773	0.19337	0.000234042	-0.0267062	0.623949	0.103858	0.0565761
I19062_8_seq1	I19062_8_seq2	I19057_3_seq1	I19057_3_seq2	BAAAA	ABAAA	AABAA	AAABA	introgression	DFO_stat	DFO_Pvalue	DIL_stat	DIL_Pvalue	DFI_stat	DFI_Pvalue	DOL_stat	DOL_Pvalue
I19062_8_seq1	I19062_8_seq2	I19058_4_seq1	I19059_5_seq1	688	654	690	636	none	0.137615	0.150792	0.192661	0.0442795	0.1	0.371093	0.175	0.117525
I19062_8_seq1	I19062_8_seq2	I19058_4_seq1	I19059_5_seq2	689	650	744	691	none	0.261538	0.00286375	-0.0923077	0.292584	0.125	0.263552	-0.45	5.69941e-05
I19062_8_seq1	I19062_8_seq2	I19058_4_seq2	I19058_4_seq1	712	679	615	645	none	-0.0894309	0.321277	0.138211	0.125316	-0.318681	0.00236558	-0.010989	0.916512
I19062_8_seq1	I19062_8_seq2	I19058_4_seq2	I19059_5_seq1	682	647	730	690	none	-0.028169	0.737118	0.366197	1.27856e-05	-0.477273	7.56231e-06	0.159091	0.135593
I19062_8_seq1	I19062_8_seq2	I19058_4_seq2	I19059_5_seq2	711	645	698	668	none	0.148936	0.148742	0.191489	0.063374	-0.254237	0.0508393	-0.186441	0.152121
I19062_8_seq1	I19062_8_seq2	I19059_5_seq1	I19059_5_seq2	704	663	593	587	none	0.176471	0.0747059	-0.313725	0.00153242	0.180723	0.0996683	-0.421687	0.000122161
I19062_8_seq1	I19062_8_seq2	I19060_6_seq1	I19060_6_seq2	506	452	406	394	none	0.245217	4.10003e-09	-0.217391	1.85951e-07	0.150943	0.000510895	-0.350943	6.66134e-16
I19062_8_seq1	I19062_8_seq2	I19061_7_seq1	I19061_7_seq2	449	474	493	447	none	0.141509	0.000358713	-0.0566038	0.153438	0.125234	0.00377155	-0.11028	0.0107478
I19062_8_seq1	I19062_8_seq2	I19064_11_seq1	I19064_11_seq2	550	526	703	683	none	-0.0973783	0.0244324	0.00374532	0.93103	-0.146667	0.0045087	-0.00266667	0.958816
I19062_8_seq1	I19062_8_seq2	I19065_12_seq1	I19065_12_seq2	620	588	897	829	none	-0.200924	2.9029e-05	0.0669746	0.163423	-0.221053	0.000190118	0.185965	0.00169266
I19062_8_seq1	I19062_8_seq2	I19066_13_seq1	I19065_12_seq1	617	573	850	991	none	0.154013	0.000943684	-0.0195228	0.675091	0.0733591	0.237761	-0.235521	0.000150432
I19062_8_seq1	I19062_8_seq2	I19066_13_seq1	I19065_12_seq2	582	573	874	956	none	-0.0367347	0.416128	0.0489796	0.278272	-0.0612245	0.293819	0.0816327	0.161601
I19062_8_seq1	I19062_8_seq2	I19066_13_seq2	I19065_12_seq1	634	570	962	1015	none	0.152941	0.00161622	0.0258824	0.593633	0.0245902	0.700896	-0.196721	0.00212
I19062_8_seq1	I19062_8_seq2	I19066_13_seq2	I19065_12_seq2	598	576	931	926	none	-0.0412844	0.388663	0.110092	0.0215173	-0.131387	0.0296421	0.109489	0.0699296
I19062_8_seq1	I19062_8_seq2	I19066_13_seq2	I19066_13_seq1	629	599	761	652	none	0.0128205	0.820847	0.0641026	0.257518	-0.0530303	0.388885	0.00757576	0.902035
I19062_8_seq1	I19062_8_seq2	I19067_14_seq1	I19065_12_seq1	650	568	937	1004	123	0.174107	0.000228565	0.174107	0.000228565	-0.104839	0.0987382	-0.104839	0.0987382
I19062_8_seq1	I19062_8_seq2	I19067_14_seq1	I19065_12_seq2	605	571	1008	1028	none	-0.0297398	0.490314	0.189591	1.09489e-05	-0.260274	8.68498e-06	0.143836	0.0139766
I19062_8_seq1	I19062_8_seq2	I19067_14_seq1	I19066_13_seq1	625	574	954	901	none	0.00211416	0.963326	0.183932	6.32718e-05	-0.227941	0.000170388	0.0882353	0.14561
I19062_8_seq1	I19062_8_seq2	I19067_14_seq1	I19066_13_seq2	632	575	988	1035	none	0.0104384	0.819292	0.135699	0.00297872	-0.219697	0.000357454	0.00757576	0.902035
I19062_8_seq1	I19062_8_seq2	I19067_14_seq1	I19067_14_seq2	636	594	783	798	none	0.0191388	0.695581	0.0813397	0.0963136	-0.194346	0.00107772	-0.102473	0.0847311
I19062_8_seq1	I19062_8_seq2	I19067_14_seq2	I19065_12_seq1	632	569	983	1048	none	0.152475	0.000611515	0.0811881	0.0680801	-0.0220588	0.716005	-0.154412	0.0108771
I19062_8_seq1	I19062_8_seq2	I19067_14_seq2	I19065_12_seq2	611	582	979	986	none	-0.037037	0.427491	0.137255	0.0032759	-0.134752	0.0236439	0.148936	0.0123821
I19062_8_seq1	I19062_8_seq2	I19067_14_seq2	I19066_13_seq1	602	574	993	922	none	-0.00184843	0.965707	0.0942699	0.0283318	-0.152318	0.00812087	0.0198675	0.729898
I19062_8_seq1	I19062_8_seq2	I19067_14_seq2	I19066_13_seq2	620	578	967	994	none	0.00215054	0.963012	0.0623656	0.178676	-0.124555	0.0368046	-0.024911	0.676251
I19062_8_seq1	I19062_8_seq2	I19068_16_seq1	I19065_12_seq1	598	518	989	984	none	0.112527	0.0146017	0.0658174	0.153175	-0.027668	0.659875	-0.114625	0.0682709
I19062_8_seq1	I19062_8_seq2	I19068_16_seq1	I19065_12_seq2	553	516	1037	979	none	-0.0674157	0.119264	0.0636704	0.141204	-0.153333	0.00791179	0.08	0.165857
I19062_8_seq1	I19062_8_seq2	I19068_16_seq1	I19066_13_seq1	572	523	996	861	none	-0.0308008	0.496685	0.0472279	0.297305	-0.141818	0.0186834	-0.00363636	0.951915
I19062_8_seq1	I19062_8_seq2	I19068_16_seq1	I19066_13_seq2	586	513	1018	987	none	-0.0419426	0.372019	-0.00662252	0.887908	-0.0814815	0.180611	-0.0222222	0.715001
I19062_8_seq1	I19062_8_seq2	I19068_16_seq1	I19067_14_seq1	593	524	976	876	none	-0.0714286	0.119141	-0.117647	0.0102655	-0.071161	0.244918	-0.153558	0.0121019
I19062_8_seq1	I19062_8_seq2	I19068_16_seq1	I19067_14_seq2	576	529	984	917	none	-0.0664062	0.132942	-0.0234375	0.595883	-0.136842	0.0208793	-0.0596491	0.313938
I19062_8_seq1	I19062_8_seq2	I19068_16_seq2	I19065_12_seq1	600	524	968	1021	none	0.214286	5.74471e-06	0.111607	0.018163	0.037037	0.563703	-0.152263	0.017618
I19062_8_seq1	I19062_8_seq2	I19068_16_seq2	I19065_12_seq2	566	533	962	943	none	0.017316	0.709749	0.12987	0.0052472	-0.108614	0.0759357	0.0861423	0.159256
I19062_8_seq1	I19062_8_seq2	I19068_16_seq2	I19066_13_seq1	585	531	962	868	none	0.0521327	0.284195	0.113744	0.0194598	-0.0823529	0.188486	0.0196078	0.754195
I19062_8_seq1	I19062_8_seq2	I19068_16_seq2	I19066_13_seq2	590	532	962	963	none	0.056701	0.264045	0.0670103	0.186852	-0.0843373	0.183248	-0.0682731	0.281332
I19062_8_seq1	I19062_8_seq2	I19068_16_seq2	I19067_14_seq1	599	544	965	896	none	0.0166271	0.732984	-0.0973872	0.0456931	-0.0583333	0.366157	-0.258333	6.27873e-05
I19062_8_seq1	I19062_8_seq2	I19068_16_seq2	I19067_14_seq2	588	543	940	899	none	0.0114416	0.810964	0.0160183	0.737734	-0.0810811	0.191935	-0.0733591	0.237761
I19062_8_seq1	I19062_8_seq2	I19068_16_seq2	I19068_16_seq1	592	542	720	771	none	0.126685	0.0146824	0.0619946	0.232439	-0.0334572	0.583184	-0.122677	0.0442151
I19062_8_seq1	I19065_12_seq1	I19057_3_seq1	I19057_3_seq2	BAAAA	ABAAA	AABAA	AAABA	introgression	DFO_stat	DFO_Pvalue	DIL_stat	DIL_Pvalue	DFI_stat	DFI_Pvalue	DOL_stat	DOL_Pvalue
I19062_8_seq1	I19065_12_seq2	I19057_3_seq1	I19057_3_seq2	BAAAA	ABAAA	AABAA	AAABA	introgression	DFO_stat	DFO_Pvalue	DIL_stat	DIL_Pvalue	DFI_stat	DFI_Pvalue	DOL_stat	DOL_Pvalue
I19062_8_seq1	I19066_13_seq1	I19057_3_seq1	I19057_3_seq2	BAAAA	ABAAA	AABAA	AAABA	introgression	DFO_stat	DFO_Pvalue	DIL_stat	DIL_Pvalue	DFI_stat	DFI_Pvalue	DOL_stat	DOL_Pvalue
I19062_8_seq1	I19066_13_seq2	I19057_3_seq1	I19057_3_seq2	BAAAA	ABAAA	AABAA	AAABA	introgression	DFO_stat	DFO_Pvalue	DIL_stat	DIL_Pvalue	DFI_stat	DFI_Pvalue	DOL_stat	DOL_Pvalue
I19062_8_seq1	I19067_14_seq1	I19057_3_seq1	I19057_3_seq2	BAAAA	ABAAA	AABAA	AAABA	introgression	DFO_stat	DFO_Pvalue	DIL_stat	DIL_Pvalue	DFI_stat	DFI_Pvalue	DOL_stat	DOL_Pvalue
I19062_8_seq1	I19067_14_seq2	I19057_3_seq1	I19057_3_seq2	BAAAA	ABAAA	AABAA	AAABA	introgression	DFO_stat	DFO_Pvalue	DIL_stat	DIL_Pvalue	DFI_stat	DFI_Pvalue	DOL_stat	DOL_Pvalue
I19062_8_seq1	I19068_16_seq1	I19057_3_seq1	I19057_3_seq2	BAAAA	ABAAA	AABAA	AAABA	introgression	DFO_stat	DFO_Pvalue	DIL_stat	DIL_Pvalue	DFI_stat	DFI_Pvalue	DOL_stat	DOL_Pvalue
I19062_8_seq1	I19068_16_seq2	I19057_3_seq1	I19057_3_seq2	BAAAA	ABAAA	AABAA	AAABA	introgression	DFO_stat	DFO_Pvalue	DIL_stat	DIL_Pvalue	DFI_stat	DFI_Pvalue	DOL_stat	DOL_Pvalue
I19062_8_seq2	I19061_7_seq1	I19057_3_seq1	I19057_3_seq2	BAAAA	ABAAA	AABAA	AAABA	introgression	DFO_stat	DFO_Pvalue	DIL_stat	DIL_Pvalue	DFI_stat	DFI_Pvalue	DOL_stat	DOL_Pvalue
I19062_8_seq2	I19061_7_seq1	I19058_4_seq1	I19059_5_seq1	807	836	675	620	none	0.178571	0.0587817	0.0714286	0.449692	-0.0344828	0.710347	-0.137931	0.137395
I19062_8_seq2	I19061_7_seq1	I19058_4_seq1	I19059_5_seq2	807	841	726	677	none	-0.111111	0.196706	0.185185	0.0314243	-0.0350877	0.707932	0.315789	0.000747034
I19062_8_seq2	I19061_7_seq1	I19058_4_seq2	I19058_4_seq1	840	884	603	617	none	0.258621	0.00534568	-0.189655	0.0410872	0.403509	1.64518e-05	-0.0526316	0.574149
I19062_8_seq2	I19061_7_seq1	I19058_4_seq2	I19059_5_seq1	801	835	718	666	none	0.385714	5.0228e-06	-0.1	0.236724	0.411765	7.06162e-06	-0.159664	0.0815562
I19062_8_seq2	I19061_7_seq1	I19058_4_seq2	I19059_5_seq2	803	865	680	643	none	0.18	0.0718606	0.02	0.841481	0.303371	0.00420985	0.123596	0.243615
I19062_8_seq2	I19061_7_seq1	I19059_5_seq1	I19059_5_seq2	831	874	570	569	none	-0.315315	0.000893577	0.171171	0.0713254	-0.0877193	0.348972	0.385965	3.77268e-05
I19062_8_seq2	I19061_7_seq1	I19064_11_seq1	I19064_11_seq2	641	744	670	652	none	-0.00757576	0.861804	-0.0795455	0.0675773	0.12766	0.00564718	0.0468085	0.310209
I19062_8_seq2	I19061_7_seq1	I19065_12_seq1	I19065_12_seq2	731	775	844	809	none	0.011655	0.809243	-0.114219	0.017994	0.0949721	0.0723426	-0.0558659	0.290497
I19062_8_seq2	I19061_7_seq1	I19066_13_seq1	I19065_12_seq1	695	749	837	942	none	-0.0403587	0.394034	0.058296	0.218272	-0.0647059	0.232823	0.0647059	0.232823
I19062_8_seq2	I19061_7_seq1	I19066_13_seq1	I19065_12_seq2	695	732	834	915	none	-0.0183299	0.684622	-0.0468432	0.299281	0.0324324	0.532726	-0.00540541	0.917189
I19062_8_seq2	I19061_7_seq1	I19066_13_seq2	I19065_12_seq1	693	751	930	962	none	0.0308789	0.526354	0.087886	0.0713459	-0.00293255	0.956813	0.0674487	0.212941
I19062_8_seq2	I19061_7_seq1	I19066_13_seq2	I19065_12_seq2	685	737	878	886	none	0.0565217	0.225414	-0.0217391	0.641035	0.072	0.163235	-0.024	0.642105
I19062_8_seq2	I19061_7_seq1	I19066_13_seq2	I19066_13_seq1	740	787	733	643	none	0.108197	0.0588149	0.042623	0.456648	0.0289017	0.590851	-0.0289017	0.590851
I19062_8_seq2	I19061_7_seq1	I19067_14_seq1	I19065_12_seq1	694	790	895	943	none	0.215777	7.47647e-06	0.0580046	0.228509	0.172619	0.00155532	-0.0297619	0.585379
I19062_8_seq2	I19061_7_seq1	I19067_14_seq1	I19065_12_seq2	681	768	951	985	none	0.173832	5.80155e-05	-0.0542056	0.209922	0.21671	2.22425e-05	-0.101828	0.0462826
I19062_8_seq2	I19061_7_seq1	I19067_14_seq1	I19066_13_seq1	694	776	908	876	none	0.226496	9.5909e-07	-0.0128205	0.781511	0.194444	0.000224851	-0.116667	0.0268567
I19062_8_seq2	I19061_7_seq1	I19067_14_seq1	I19066_13_seq2	681	772	946	999	none	0.147475	0.00103401	-0.0262626	0.559014	0.172414	0.000814939	-0.0557029	0.27945
I19062_8_seq2	I19061_7_seq1	I19067_14_seq1	I19067_14_seq2	722	805	756	769	none	0.0926829	0.0605611	0.0195122	0.692775	0.171504	0.000841333	0.0923483	0.0722041
I19062_8_seq2	I19061_7_seq1	I19067_14_seq2	I19065_12_seq1	687	755	927	975	none	0.0951456	0.0308348	0.0601942	0.171932	0.0952381	0.0640775	0.047619	0.354539
I19062_8_seq2	I19061_7_seq1	I19067_14_seq2	I19065_12_seq2	692	769	927	950	none	0.101512	0.028942	-0.0539957	0.245297	0.107527	0.0380883	-0.0860215	0.0970911
I19062_8_seq2	I19061_7_seq1	I19067_14_seq2	I19066_13_seq1	688	743	942	894	none	0.123134	0.00436141	-0.0186567	0.665789	0.140704	0.00500011	-0.0502513	0.316098
I19062_8_seq2	I19061_7_seq1	I19067_14_seq2	I19066_13_seq2	682	753	917	953	none	0.0666667	0.144127	-0.0375	0.411314	0.111675	0.0266444	-0.0152284	0.762442
I19062_8_seq2	I19061_7_seq1	I19068_16_seq1	I19065_12_seq1	634	732	946	914	none	0.111111	0.0184221	0.0355556	0.450701	0.0691824	0.217315	-0.0377358	0.500994
I19062_8_seq2	I19061_7_seq1	I19068_16_seq1	I19065_12_seq2	625	705	984	924	none	0.0736434	0.0943555	-0.0775194	0.078255	0.141274	0.00727013	-0.0747922	0.155301
I19062_8_seq2	I19061_7_seq1	I19068_16_seq1	I19066_13_seq1	633	709	970	835	none	0.119497	0.00905817	-0.0314465	0.492207	0.129412	0.0170219	-0.0823529	0.128885
I19062_8_seq2	I19061_7_seq1	I19068_16_seq1	I19066_13_seq2	626	711	983	937	none	0.037037	0.427491	-0.0631808	0.175863	0.121387	0.0239498	-0.0115607	0.829735
I19062_8_seq2	I19061_7_seq1	I19068_16_seq1	I19067_14_seq1	633	757	945	837	none	-0.111111	0.0196307	-0.047619	0.317311	0.00900901	0.869417	0.0930931	0.0893588
I19062_8_seq2	I19061_7_seq1	I19068_16_seq1	I19067_14_seq2	633	715	933	853	none	0.00596421	0.89359	-0.0576541	0.195995	0.10992	0.0337623	0.0241287	0.641214
I19062_8_seq2	I19061_7_seq1	I19068_16_seq2	I19065_12_seq1	645	721	933	951	123	0.131818	0.00569156	0.140909	0.00311926	0.0473186	0.399517	0.0599369	0.285906
I19062_8_seq2	I19061_7_seq1	I19068_16_seq2	I19065_12_seq2	631	716	925	897	none	0.106754	0.0221886	0.00653595	0.888638	0.0544413	0.309131	-0.0773639	0.14838
I19062_8_seq2	I19061_7_seq1	I19068_16_seq2	I19066_13_seq1	650	712	931	838	none	0.159905	0.00106351	0.0644391	0.187157	0.0848485	0.123232	-0.0363636	0.508883
I19062_8_seq2	I19061_7_seq1	I19068_16_seq2	I19066_13_seq2	638	712	934	925	none	0.0735294	0.137485	0.0392157	0.428292	0.0643275	0.234194	0.0233918	0.665312
I19062_8_seq2	I19061_7_seq1	I19068_16_seq2	I19067_14_seq1	647	750	939	854	none	-0.107914	0.0275483	0.0647482	0.186103	-0.0243902	0.658687	0.195122	0.000409617
I19062_8_seq2	I19061_7_seq1	I19068_16_seq2	I19067_14_seq2	641	725	910	847	none	0.0157303	0.740016	0.0426966	0.367755	0.0223464	0.672432	0.0558659	0.290497
I19062_8_seq2	I19061_7_seq1	I19068_16_seq2	I19068_16_seq1	674	757	685	743	none	0.0327869	0.530495	0.125683	0.0161964	0.0121212	0.825721	0.115152	0.0364536
I19062_8_seq2	I19061_7_seq2	I19057_3_seq1	I19057_3_seq2	BAAAA	ABAAA	AABAA	AAABA	introgression	DFO_stat	DFO_Pvalue	DIL_stat	DIL_Pvalue	DFI_stat	DFI_Pvalue	DOL_stat	DOL_Pvalue
I19062_8_seq2	I19061_7_seq2	I19058_4_seq1	I19059_5_seq1	841	779	671	625	none	0.163636	0.0861195	0.0727273	0.445601	0.255319	0.0133083	0.148936	0.148742
I19062_8_seq2	I19061_7_seq2	I19058_4_seq1	I19059_5_seq2	840	785	748	678	none	0.0825688	0.388663	-0.0458716	0.632	0.296703	0.00464943	0.142857	0.172955
I19062_8_seq2	I19061_7_seq2	I19058_4_seq2	I19058_4_seq1	861	812	603	642	none	0.032967	0.753152	0.0989011	0.345448	0.166667	0.10247	0.229167	0.0247447
I19062_8_seq2	I19061_7_seq2	I19058_4_seq2	I19059_5_seq1	834	780	717	700	none	0.229358	0.0166401	0.192661	0.0442795	0.157895	0.123812	0.115789	0.259077
I19062_8_seq2	I19061_7_seq2	I19058_4_seq2	I19059_5_seq2	833	783	677	644	none	0.157895	0.123812	0.0736842	0.472643	0.217391	0.0370562	0.130435	0.210903
I19062_8_seq2	I19061_7_seq2	I19059_5_seq1	I19059_5_seq2	860	809	598	567	none	-0.111111	0.317311	-0.135802	0.221624	0.223529	0.0393184	0.2	0.0651964
I19062_8_seq2	I19061_7_seq2	I19064_11_seq1	I19064_11_seq2	650	696	692	684	none	-0.0146751	0.748583	-0.111111	0.0152367	0.218447	9.25085e-06	0.106796	0.0301797
I19062_8_seq2	I19061_7_seq2	I19065_12_seq1	I19065_12_seq2	745	722	862	834	none	-0.0153846	0.761264	-0.0564103	0.265273	0.0448718	0.428014	-0.00641026	0.90985
I19062_8_seq2	I19061_7_seq2	I19066_13_seq1	I19065_12_seq1	702	665	825	945	none	-0.0423163	0.369897	-0.0111359	0.81346	0.0151976	0.78281	0.0577508	0.294867
I19062_8_seq2	I19061_7_seq2	I19066_13_seq1	I19065_12_seq2	709	671	838	947	none	-0.0604027	0.201582	-0.0514541	0.276656	0.0519878	0.347165	0.0642202	0.245519
I19062_8_seq2	I19061_7_seq2	I19066_13_seq2	I19065_12_seq1	710	682	942	969	none	0.0521092	0.295522	0.00248139	0.960271	0.113333	0.0496472	0.0466667	0.418923
I19062_8_seq2	I19061_7_seq2	I19066_13_seq2	I19065_12_seq2	700	684	899	916	none	0.0436893	0.375189	-0.0291262	0.554388	0.109718	0.0500398	0.015674	0.779519
I19062_8_seq2	I19061_7_seq2	I19066_13_seq2	I19066_13_seq1	741	695	744	629	none	0.14	0.0153138	0.0333333	0.563703	0.145455	0.00823419	0.0484848	0.378442
I19062_8_seq2	I19061_7_seq2	I19067_14_seq1	I19065_12_seq1	688	703	891	949	none	0.212121	1.11529e-05	-0.0769231	0.111103	0.267857	9.11217e-07	-0.10119	0.0636174
I19062_8_seq2	I19061_7_seq2	I19067_14_seq1	I19065_12_seq2	682	693	958	1009	none	0.159363	0.000356199	-0.119522	0.00740785	0.283333	7.62129e-08	-0.105556	0.0452014
I19062_8_seq2	I19061_7_seq2	I19067_14_seq1	I19066_13_seq1	687	674	904	862	none	0.229474	5.6956e-07	-0.0610526	0.183317	0.326087	3.96416e-10	-0.048913	0.348083
I19062_8_seq2	I19061_7_seq2	I19067_14_seq1	I19066_13_seq2	679	683	944	1007	none	0.138716	0.00229906	-0.0807453	0.0759703	0.287293	4.59997e-08	-0.00552486	0.916282
I19062_8_seq2	I19061_7_seq2	I19067_14_seq1	I19067_14_seq2	722	723	767	787	none	0.0971129	0.0580173	-0.0708661	0.166588	0.277778	1.3608e-07	0.1	0.0577796
I19062_8_seq2	I19061_7_seq2	I19067_14_seq2	I19065_12_seq1	700	688	944	992	none	0.106557	0.0185761	0	1	0.135447	0.0116328	-0.0144092	0.788381
I19062_8_seq2	I19061_7_seq2	I19067_14_seq2	I19065_12_seq2	711	684	923	954	none	0.0815451	0.0783542	-0.055794	0.228425	0.186246	0.000502594	0.00286533	0.957311
I19062_8_seq2	I19061_7_seq2	I19067_14_seq2	I19066_13_seq1	696	663	960	895	none	0.136719	0.00197749	0.0117188	0.790882	0.172414	0.000814939	0.00265252	0.958925
I19062_8_seq2	I19061_7_seq2	I19067_14_seq2	I19066_13_seq2	698	680	931	970	none	0.0577778	0.22033	-0.00888889	0.850436	0.144476	0.00663847	0.0594901	0.263688
I19062_8_seq2	I19061_7_seq2	I19068_16_seq1	I19065_12_seq1	636	651	947	922	none	0.105618	0.0258796	-0.0561798	0.235973	0.182724	0.00152362	-0.0564784	0.327153
I19062_8_seq2	I19061_7_seq2	I19068_16_seq1	I19065_12_seq2	635	639	995	953	none	0.0420168	0.359301	-0.092437	0.043723	0.197492	0.000419785	-0.0031348	0.95535
I19062_8_seq2	I19061_7_seq2	I19068_16_seq1	I19066_13_seq1	632	611	972	829	none	0.114407	0.0129351	-0.0338983	0.461451	0.234043	2.1845e-05	0.0212766	0.699554
I19062_8_seq2	I19061_7_seq2	I19068_16_seq1	I19066_13_seq2	623	623	988	951	none	0.0205011	0.667526	-0.070615	0.138994	0.183801	0.000991037	0.05919	0.288928
I19062_8_seq2	I19061_7_seq2	I19068_16_seq1	I19067_14_seq1	623	656	949	841	none	-0.114219	0.017994	0.002331	0.961493	0.0642202	0.245519	0.217125	8.62593e-05
I19062_8_seq2	I19061_7_seq2	I19068_16_seq1	I19067_14_seq2	636	635	944	877	none	-0.012766	0.781965	-0.0680851	0.13993	0.16129	0.00289742	0.085044	0.116313
I19062_8_seq2	I19061_7_seq2	I19068_16_seq2	I19065_12_seq1	648	641	927	966	none	0.0976744	0.0428243	0.106977	0.0265332	0.0397351	0.489866	0.0529801	0.357209
I19062_8_seq2	I19061_7_seq2	I19068_16_seq2	I19065_12_seq2	642	642	918	924	none	0.0410959	0.389749	0.0456621	0.339256	0.0470219	0.400999	0.0532915	0.34119
I19062_8_seq2	I19061_7_seq2	I19068_16_seq2	I19066_13_seq1	643	616	927	840	none	0.124694	0.011676	0.114914	0.0201255	0.0769231	0.165518	0.0646154	0.244071
I19062_8_seq2	I19061_7_seq2	I19068_16_seq2	I19066_13_seq2	641	626	932	947	none	0.0207254	0.683869	0.0932642	0.066899	0.0576923	0.30818	0.147436	0.0092079
I19062_8_seq2	I19061_7_seq2	I19068_16_seq2	I19067_14_seq1	632	649	935	862	none	-0.136476	0.00614868	0.151365	0.00237659	-0.0606061	0.270912	0.290909	1.25962e-07
I19062_8_seq2	I19061_7_seq2	I19068_16_seq2	I19067_14_seq2	644	638	906	870	none	-0.0328638	0.49758	0.0704225	0.146084	0.0119048	0.827259	0.142857	0.00882876
I19062_8_seq2	I19061_7_seq2	I19068_16_seq2	I19068_16_seq1	670	662	689	760	none	0.00296736	0.956558	0.192878	0.000398953	-0.00315457	0.95521	0.198738	0.00040251
I19062_8_seq2	I19065_12_seq1	I19057_3_seq1	I19057_3_seq2	BAAAA	ABAAA	AABAA	AAABA	introgression	DFO_stat	DFO_Pvalue	DIL_stat	DIL_Pvalue	DFI_stat	DFI_Pvalue	DOL_stat	DOL_Pvalue
I19062_8_seq2	I19065_12_seq2	I19057_3_seq1	I19057_3_seq2	BAAAA	ABAAA	AABAA	AAABA	introgression	DFO_stat	DFO_Pvalue	DIL_stat	DIL_Pvalue	DFI_stat	DFI_Pvalue	DOL_stat	DOL_Pvalue
I19062_8_seq2	I19066_13_seq1	I19057_3_seq1	I19057_3_seq2	BAAAA	ABAAA	AABAA	AAABA	introgression	DFO_stat	DFO_Pvalue	DIL_stat	DIL_Pvalue	DFI_stat	DFI_Pvalue	DOL_stat	DOL_Pvalue
I19062_8_seq2	I19066_13_seq2	I19057_3_seq1	I19057_3_seq2	BAAAA	ABAAA	AABAA	AAABA	introgression	DFO_stat	DFO_Pvalue	DIL_stat	DIL_Pvalue	DFI_stat	DFI_Pvalue	DOL_stat	DOL_Pvalue
I19062_8_seq2	I19067_14_seq1	I19057_3_seq1	I19057_3_seq2	BAAAA	ABAAA	AABAA	AAABA	introgression	DFO_stat	DFO_Pvalue	DIL_stat	DIL_Pvalue	DFI_stat	DFI_Pvalue	DOL_stat	DOL_Pvalue
I19062_8_seq2	I19067_14_seq2	I19057_3_seq1	I19057_3_seq2	BAAAA	ABAAA	AABAA	AAABA	introgression	DFO_stat	DFO_Pvalue	DIL_stat	DIL_Pvalue	DFI_stat	DFI_Pvalue	DOL_stat	DOL_Pvalue
I19062_8_seq2	I19068_16_seq1	I19057_3_seq1	I19057_3_seq2	BAAAA	ABAAA	AABAA	AAABA	introgression	DFO_stat	DFO_Pvalue	DIL_stat	DIL_Pvalue	DFI_stat	DFI_Pvalue	DOL_stat	DOL_Pvalue
I19062_8_seq2	I19068_16_seq2	I19057_3_seq1	I19057_3_seq2	BAAAA	ABAAA	AABAA	AAABA	introgression	DFO_stat	DFO_Pvalue	DIL_stat	DIL_Pvalue	DFI_stat	DFI_Pvalue	DOL_stat	DOL_Pvalue
I19064_11_seq1	I19060_6_seq1	I19057_3_seq1	I19057_3_seq2	BAAAA	ABAAA	AABAA	AAABA	introgression	DFO_stat	DFO_Pvalue	DIL_stat	DIL_Pvalue	DFI_stat	DFI_Pvalue	DOL_stat	DOL_Pvalue
I19064_11_seq1	I19060_6_seq2	I19057_3_seq1	I19057_3_seq2	BAAAA	ABAAA	AABAA	AAABA	introgression	DFO_stat	DFO_Pvalue	DIL_stat	DIL_Pvalue	DFI_stat	DFI_Pvalue	DOL_stat	DOL_Pvalue
I19064_11_seq1	I19061_7_seq1	I19057_3_seq1	I19057_3_seq2	BAAAA	ABAAA	AABAA	AAABA	introgression	DFO_stat	DFO_Pvalue	DIL_stat	DIL_Pvalue	DFI_stat	DFI_Pvalue	DOL_stat	DOL_Pvalue
I19064_11_seq1	I19061_7_seq2	I19057_3_seq1	I19057_3_seq2	BAAAA	ABAAA	AABAA	AAABA	introgression	DFO_stat	DFO_Pvalue	DIL_stat	DIL_Pvalue	DFI_stat	DFI_Pvalue	DOL_stat	DOL_Pvalue
I19064_11_seq1	I19062_8_seq1	I19057_3_seq1	I19057_3_seq2	BAAAA	ABAAA	AABAA	AAABA	introgression	DFO_stat	DFO_Pvalue	DIL_stat	DIL_Pvalue	DFI_stat	DFI_Pvalue	DOL_stat	DOL_Pvalue
I19064_11_seq1	I19062_8_seq2	I19057_3_seq1	I19057_3_seq2	BAAAA	ABAAA	AABAA	AAABA	introgression	DFO_stat	DFO_Pvalue	DIL_stat	DIL_Pvalue	DFI_stat	DFI_Pvalue	DOL_stat	DOL_Pvalue
I19064_11_seq1	I19064_11_seq2	I19057_3_seq1	I19057_3_seq2	BAAAA	ABAAA	AABAA	AAABA	introgression	DFO_stat	DFO_Pvalue	DIL_stat	DIL_Pvalue	DFI_stat	DFI_Pvalue	DOL_stat	DOL_Pvalue
I19064_11_seq1	I19064_11_seq2	I19058_4_seq1	I19059_5_seq1	853	867	680	619	none	0.171171	0.0713254	0.0810811	0.392971	-0.16	0.109599	-0.26	0.00932238
I19064_11_seq1	I19064_11_seq2	I19058_4_seq1	I19059_5_seq2	856	869	718	667	none	-0.0542636	0.537686	0.209302	0.0174438	-0.142857	0.157299	0.204082	0.0433518
I19064_11_seq1	I19064_11_seq2	I19058_4_seq2	I19058_4_seq1	880	893	606	635	none	0.230769	0.00850904	-0.169231	0.0536654	0.282051	0.00228194	-0.162393	0.0789944
I19064_11_seq1	I19064_11_seq2	I19058_4_seq2	I19059_5_seq1	845	871	724	672	none	0.414286	9.49167e-07	-0.114286	0.176296	0.346154	0.000415418	-0.365385	0.000194383
I19064_11_seq1	I19064_11_seq2	I19058_4_seq2	I19059_5_seq2	846	897	680	649	none	0.313131	0.0018356	0.010101	0.919944	0.2	0.0736383	-0.175	0.117525
I19064_11_seq1	I19064_11_seq2	I19066_13_seq1	I19065_12_seq1	694	705	796	896	none	0.0669078	0.115626	0.045208	0.287733	0.0410367	0.377234	0.0151188	0.744941
I19064_11_seq1	I19064_11_seq2	I19066_13_seq1	I19065_12_seq2	698	663	793	885	none	0.178808	1.1105e-05	-0.135762	0.000848305	0.116832	0.00865306	-0.259406	5.56192e-09
I19064_11_seq1	I19064_11_seq2	I19066_13_seq2	I19065_12_seq1	710	668	892	905	none	-0.1	0.0179605	0.228571	6.33821e-08	-0.26078	8.66832e-09	0.117043	0.0097969
I19064_11_seq1	I19064_11_seq2	I19066_13_seq2	I19065_12_seq2	737	635	851	856	none	0.035461	0.399703	0.0390071	0.354255	-0.127273	0.004631	-0.123232	0.00611136
I19064_11_seq1	I19064_11_seq2	I19067_14_seq1	I19065_12_seq1	689	718	895	915	none	0.102837	0.0145964	0.0212766	0.613354	0.0890269	0.0503983	-0.00621118	0.891422
I19064_11_seq1	I19064_11_seq2	I19067_14_seq1	I19065_12_seq2	703	674	937	962	none	0.202454	2.34697e-07	-0.156442	6.47958e-05	0.19305	1.11413e-05	-0.258687	3.91792e-09
I19064_11_seq1	I19064_11_seq2	I19067_14_seq1	I19066_13_seq1	701	726	879	813	none	0.0314685	0.45168	0.0034965	0.933355	0.0190275	0.679006	-0.0147992	0.747558
I19064_11_seq1	I19064_11_seq2	I19067_14_seq1	I19066_13_seq2	723	676	899	927	none	0.17175	1.81213e-05	-0.168539	2.59085e-05	0.15415	0.000525279	-0.264822	2.56868e-09
I19064_11_seq1	I19064_11_seq2	I19067_14_seq2	I19065_12_seq1	699	671	934	941	none	-0.0604651	0.124631	0.116279	0.00314577	-0.111531	0.0103111	0.10397	0.0167886
I19064_11_seq1	I19064_11_seq2	I19067_14_seq2	I19065_12_seq2	735	663	922	933	none	0.0685921	0.106427	-0.0794224	0.0615698	-0.0139165	0.754953	-0.176938	7.2383e-05
I19064_11_seq1	I19064_11_seq2	I19067_14_seq2	I19066_13_seq1	702	680	908	833	none	-0.0925645	0.0174909	0.0591806	0.128706	-0.11575	0.00787923	0.0740038	0.0893443
I19064_11_seq1	I19064_11_seq2	I19067_14_seq2	I19066_13_seq2	744	655	899	917	none	0.04947	0.239224	-0.109541	0.00915919	-0.00194175	0.964852	-0.176699	6.07344e-05
I19064_11_seq1	I19064_11_seq2	I19068_16_seq1	I19065_12_seq1	652	679	957	884	none	0.04	0.337475	-0.0295652	0.478356	0.0595483	0.188807	-0.0225873	0.618162
I19064_11_seq1	I19064_11_seq2	I19068_16_seq1	I19065_12_seq2	652	629	967	908	none	0.113737	0.00308288	-0.172821	6.90243e-06	0.142857	0.000911119	-0.217069	4.66636e-07
I19064_11_seq1	I19064_11_seq2	I19068_16_seq1	I19066_13_seq1	655	670	932	775	none	-0.031614	0.438324	-0.0682196	0.0944406	0.032	0.474274	-0.012	0.788447
I19064_11_seq1	I19064_11_seq2	I19068_16_seq1	I19066_13_seq2	667	646	939	882	none	0.0869565	0.0334668	-0.227425	2.67537e-08	0.102515	0.0197567	-0.261122	2.89766e-09
I19064_11_seq1	I19064_11_seq2	I19068_16_seq1	I19067_14_seq1	646	689	912	800	none	-0.067591	0.104463	-0.0537262	0.196861	0.00194175	0.964852	0.0174757	0.691672
I19064_11_seq1	I19064_11_seq2	I19068_16_seq1	I19067_14_seq2	658	650	918	840	none	0.0715421	0.0727705	-0.144674	0.000285175	0.0945455	0.0266035	-0.152727	0.000341272
I19064_11_seq1	I19064_11_seq2	I19068_16_seq2	I19065_12_seq1	660	665	936	906	none	0.00680272	0.868978	0.12585	0.00227543	-0.0927419	0.0388794	0.0483871	0.281198
I19064_11_seq1	I19064_11_seq2	I19068_16_seq2	I19065_12_seq2	690	636	921	887	none	0.121951	0.00348078	-0.0487805	0.242526	0.0260521	0.560594	-0.170341	0.000141734
I19064_11_seq1	I19064_11_seq2	I19068_16_seq2	I19066_13_seq1	680	680	912	775	none	-0.0333333	0.438578	0.0740741	0.0851917	-0.0808511	0.0796347	0.0425532	0.356252
I19064_11_seq1	I19064_11_seq2	I19068_16_seq2	I19066_13_seq2	709	650	919	877	none	0.128713	0.00382235	-0.120792	0.0066383	0.0486258	0.290265	-0.217759	2.18037e-06
I19064_11_seq1	I19064_11_seq2	I19068_16_seq2	I19067_14_seq1	673	684	899	807	none	-0.0825688	0.0539064	0.100917	0.0184758	-0.0985915	0.0279526	0.102616	0.0221572
I19064_11_seq1	I19064_11_seq2	I19068_16_seq2	I19067_14_seq2	695	655	876	811	none	0.0652174	0.125458	-0.0144928	0.733478	0.00194932	0.964784	-0.0838207	0.0576307
I19064_11_seq1	I19065_12_seq1	I19057_3_seq1	I19057_3_seq2	BAAAA	ABAAA	AABAA	AAABA	introgression	DFO_stat	DFO_Pvalue	DIL_stat	DIL_Pvalue	DFI_stat	DFI_Pvalue	DOL_stat	DOL_Pvalue
I19064_11_seq1	I19065_12_seq2	I19057_3_seq1	I19057_3_seq2	BAAAA	ABAAA	AABAA	AAABA	introgression	DFO_stat	DFO_Pvalue	DIL_stat	DIL_Pvalue	DFI_stat	DFI_Pvalue	DOL_stat	DOL_Pvalue
I19064_11_seq1	I19066_13_seq1	I19057_3_seq1	I19057_3_seq2	BAAAA	ABAAA	AABAA	AAABA	introgression	DFO_stat	DFO_Pvalue	DIL_stat	DIL_Pvalue	DFI_stat	DFI_Pvalue	DOL_stat	DOL_Pvalue
I19064_11_seq1	I19066_13_seq2	I19057_3_seq1	I19057_3_seq2	BAAAA	ABAAA	AABAA	AAABA	introgression	DFO_stat	DFO_Pvalue	DIL_stat	DIL_Pvalue	DFI_stat	DFI_Pvalue	DOL_stat	DOL_Pvalue
I19064_11_seq1	I19067_14_seq1	I19057_3_seq1	I19057_3_seq2	BAAAA	ABAAA	AABAA	AAABA	introgression	DFO_stat	DFO_Pvalue	DIL_stat	DIL_Pvalue	DFI_stat	DFI_Pvalue	DOL_stat	DOL_Pvalue
I19064_11_seq1	I19067_14_seq2	I19057_3_seq1	I19057_3_seq2	BAAAA	ABAAA	AABAA	AAABA	introgression	DFO_stat	DFO_Pvalue	DIL_stat	DIL_Pvalue	DFI_stat	DFI_Pvalue	DOL_stat	DOL_Pvalue
I19064_11_seq1	I19068_16_seq1	I19057_3_seq1	I19057_3_seq2	BAAAA	ABAAA	AABAA	AAABA	introgression	DFO_stat	DFO_Pvalue	DIL_stat	DIL_Pvalue	DFI_stat	DFI_Pvalue	DOL_stat	DOL_Pvalue
I19064_11_seq1	I19068_16_seq2	I19057_3_seq1	I19057_3_seq2	BAAAA	ABAAA	AABAA	AAABA	introgression	DFO_stat	DFO_Pvalue	DIL_stat	DIL_Pvalue	DFI_stat	DFI_Pvalue	DOL_stat	DOL_Pvalue
I19064_11_seq2	I19060_6_seq1	I19057_3_seq1	I19057_3_seq2	BAAAA	ABAAA	AABAA	AAABA	introgression	DFO_stat	DFO_Pvalue	DIL_stat	DIL_Pvalue	DFI_stat	DFI_Pvalue	DOL_stat	DOL_Pvalue
I19064_11_seq2	I19060_6_seq2	I19057_3_seq1	I19057_3_seq2	BAAAA	ABAAA	AABAA	AAABA	introgression	DFO_stat	DFO_Pvalue	DIL_stat	DIL_Pvalue	DFI_stat	DFI_Pvalue	DOL_stat	DOL_Pvalue
I19064_11_seq2	I19061_7_seq1	I19057_3_seq1	I19057_3_seq2	BAAAA	ABAAA	AABAA	AAABA	introgression	DFO_stat	DFO_Pvalue	DIL_stat	DIL_Pvalue	DFI_stat	DFI_Pvalue	DOL_stat	DOL_Pvalue
I19064_11_seq2	I19061_7_seq2	I19057_3_seq1	I19057_3_seq2	BAAAA	ABAAA	AABAA	AAABA	introgression	DFO_stat	DFO_Pvalue	DIL_stat	DIL_Pvalue	DFI_stat	DFI_Pvalue	DOL_stat	DOL_Pvalue
I19064_11_seq2	I19062_8_seq1	I19057_3_seq1	I19057_3_seq2	BAAAA	ABAAA	AABAA	AAABA	introgression	DFO_stat	DFO_Pvalue	DIL_stat	DIL_Pvalue	DFI_stat	DFI_Pvalue	DOL_stat	DOL_Pvalue
I19064_11_seq2	I19062_8_seq2	I19057_3_seq1	I19057_3_seq2	BAAAA	ABAAA	AABAA	AAABA	introgression	DFO_stat	DFO_Pvalue	DIL_stat	DIL_Pvalue	DFI_stat	DFI_Pvalue	DOL_stat	DOL_Pvalue
I19064_11_seq2	I19065_12_seq1	I19057_3_seq1	I19057_3_seq2	BAAAA	ABAAA	AABAA	AAABA	introgression	DFO_stat	DFO_Pvalue	DIL_stat	DIL_Pvalue	DFI_stat	DFI_Pvalue	DOL_stat	DOL_Pvalue
I19064_11_seq2	I19065_12_seq2	I19057_3_seq1	I19057_3_seq2	BAAAA	ABAAA	AABAA	AAABA	introgression	DFO_stat	DFO_Pvalue	DIL_stat	DIL_Pvalue	DFI_stat	DFI_Pvalue	DOL_stat	DOL_Pvalue
I19064_11_seq2	I19066_13_seq1	I19057_3_seq1	I19057_3_seq2	BAAAA	ABAAA	AABAA	AAABA	introgression	DFO_stat	DFO_Pvalue	DIL_stat	DIL_Pvalue	DFI_stat	DFI_Pvalue	DOL_stat	DOL_Pvalue
I19064_11_seq2	I19066_13_seq2	I19057_3_seq1	I19057_3_seq2	BAAAA	ABAAA	AABAA	AAABA	introgression	DFO_stat	DFO_Pvalue	DIL_stat	DIL_Pvalue	DFI_stat	DFI_Pvalue	DOL_stat	DOL_Pvalue
I19064_11_seq2	I19067_14_seq1	I19057_3_seq1	I19057_3_seq2	BAAAA	ABAAA	AABAA	AAABA	introgression	DFO_stat	DFO_Pvalue	DIL_stat	DIL_Pvalue	DFI_stat	DFI_Pvalue	DOL_stat	DOL_Pvalue
I19064_11_seq2	I19067_14_seq2	I19057_3_seq1	I19057_3_seq2	BAAAA	ABAAA	AABAA	AAABA	introgression	DFO_stat	DFO_Pvalue	DIL_stat	DIL_Pvalue	DFI_stat	DFI_Pvalue	DOL_stat	DOL_Pvalue
I19064_11_seq2	I19068_16_seq1	I19057_3_seq1	I19057_3_seq2	BAAAA	ABAAA	AABAA	AAABA	introgression	DFO_stat	DFO_Pvalue	DIL_stat	DIL_Pvalue	DFI_stat	DFI_Pvalue	DOL_stat	DOL_Pvalue
I19064_11_seq2	I19068_16_seq2	I19057_3_seq1	I19057_3_seq2	BAAAA	ABAAA	AABAA	AAABA	introgression	DFO_stat	DFO_Pvalue	DIL_stat	DIL_Pvalue	DFI_stat	DFI_Pvalue	DOL_stat	DOL_Pvalue
I19065_12_seq1	I19065_12_seq2	I19057_3_seq1	I19057_3_seq2	BAAAA	ABAAA	AABAA	AAABA	introgression	DFO_stat	DFO_Pvalue	DIL_stat	DIL_Pvalue	DFI_stat	DFI_Pvalue	DOL_stat	DOL_Pvalue
I19065_12_seq1	I19065_12_seq2	I19058_4_seq1	I19059_5_seq1	949	980	690	641	none	0.0598291	0.517535	0.0769231	0.405381	-0.0847458	0.357273	-0.0677966	0.461451
I19065_12_seq1	I19065_12_seq2	I19058_4_seq1	I19059_5_seq2	958	991	739	700	none	-0.109375	0.215925	0.140625	0.111612	-0.0384615	0.694887	0.269231	0.00603956
I19065_12_seq1	I19065_12_seq2	I19058_4_seq2	I19058_4_seq1	1002	1020	601	637	none	0.298246	0.00145059	-0.0877193	0.348972	0.315789	0.000747034	-0.0701754	0.453695
I19065_12_seq1	I19065_12_seq2	I19058_4_seq2	I19059_5_seq1	949	981	732	704	none	0.323741	0.000135166	-0.0215827	0.799143	0.355932	0.000110448	-0.0508475	0.580712
I19065_12_seq1	I19065_12_seq2	I19058_4_seq2	I19059_5_seq2	956	1018	692	684	none	0.266667	0.011412	0.0444444	0.67329	0.268293	0.0151199	0.0243902	0.825199
I19065_12_seq1	I19065_12_seq2	I19059_5_seq1	I19059_5_seq2	986	996	569	572	none	-0.192661	0.0442795	0.100917	0.292062	-0.00869565	0.925705	0.269565	0.00384305
I19065_12_seq1	I19065_12_seq2	I19064_11_seq1	I19060_6_seq1	765	813	852	1038	none	0.160976	6.55003e-05	0.0439024	0.276266	0.0703125	0.111612	-0.0703125	0.111612
I19065_12_seq1	I19065_12_seq2	I19064_11_seq1	I19060_6_seq2	774	775	893	1018	none	0.132638	0.000590792	-0.0551416	0.153186	0.141805	0.000951846	-0.0902394	0.035484
I19065_12_seq1	I19065_12_seq2	I19064_11_seq1	I19061_7_seq1	759	763	866	1186	none	0.185185	1.49988e-06	-0.0281481	0.46459	0.125704	0.00370679	-0.144465	0.000852257
I19065_12_seq1	I19065_12_seq2	I19064_11_seq1	I19061_7_seq2	766	791	902	1161	none	0.145865	0.000168898	0.0135338	0.727086	0.0796813	0.0742147	-0.0956175	0.0321657
I19065_12_seq1	I19065_12_seq2	I19064_11_seq1	I19062_8_seq1	779	751	855	1142	none	0.208034	3.96808e-08	-0.0530846	0.161072	0.139665	0.0012101	-0.199255	3.88595e-06
I19065_12_seq1	I19065_12_seq2	I19064_11_seq1	I19062_8_seq2	775	791	873	1109	none	0.130719	0.00122151	0.0228758	0.571451	0.0616302	0.166904	-0.0695825	0.118625
I19065_12_seq1	I19065_12_seq2	I19064_11_seq1	I19064_11_seq2	793	786	710	678	none	0.120755	0.00543619	-0.237736	4.42255e-08	0.14032	0.000870167	-0.197158	2.89556e-06
I19065_12_seq1	I19065_12_seq2	I19064_11_seq2	I19060_6_seq1	794	760	875	1092	none	0.0564885	0.148259	0.224427	9.25941e-09	-0.150735	0.000438562	0.0514706	0.229949
I19065_12_seq1	I19065_12_seq2	I19064_11_seq2	I19060_6_seq2	794	762	854	1011	none	0.0425894	0.302138	0.144804	0.000450937	-0.153558	0.000387451	-0.0411985	0.34108
I19065_12_seq1	I19065_12_seq2	I19064_11_seq2	I19061_7_seq1	794	755	878	1236	23	0.12585	0.00227543	0.146259	0.000390266	-0.130097	0.00315342	-0.106796	0.015368
I19065_12_seq1	I19065_12_seq2	I19064_11_seq2	I19061_7_seq2	798	750	876	1175	none	0.0740741	0.0593464	0.175926	7.52247e-06	-0.111538	0.0109758	0.0153846	0.725721
I19065_12_seq1	I19065_12_seq2	I19064_11_seq2	I19062_8_seq1	819	745	861	1182	none	0.149425	0.000226463	0.129721	0.00136837	-0.128906	0.00353625	-0.152344	0.000566543
I19065_12_seq1	I19065_12_seq2	I19064_11_seq2	I19062_8_seq2	803	738	855	1120	none	0.0412698	0.300265	0.2	5.16822e-07	-0.13594	0.00163168	0.0502793	0.243964
I19065_12_seq1	I19065_12_seq2	I19068_16_seq1	I19067_14_seq1	637	748	905	742	none	-0.142415	0.000294954	-0.0340557	0.386721	0.00163666	0.96773	0.116203	0.00407428
I19065_12_seq1	I19065_12_seq2	I19068_16_seq1	I19067_14_seq2	695	699	923	777	none	0.0711176	0.0619363	-0.2627	5.3656e-12	0.159609	7.65481e-05	-0.214984	9.98007e-08
I19065_12_seq1	I19065_12_seq2	I19068_16_seq2	I19067_14_seq1	681	714	867	747	none	-0.216981	4.44844e-08	0.179245	6.17246e-06	-0.189456	3.04581e-06	0.2257	2.68759e-08
I19065_12_seq1	I19065_12_seq2	I19068_16_seq2	I19067_14_seq2	738	679	852	747	none	-0.00156006	0.968494	-0.0764431	0.0529432	-0.0519263	0.204532	-0.132328	0.00122388
I19066_13_seq1	I19065_12_seq1	I19057_3_seq1	I19057_3_seq2	BAAAA	ABAAA	AABAA	AAABA	introgression	DFO_stat	DFO_Pvalue	DIL_stat	DIL_Pvalue	DFI_stat	DFI_Pvalue	DOL_stat	DOL_Pvalue
I19066_13_seq1	I19065_12_seq1	I19058_4_seq1	I19059_5_seq1	995	1066	667	635	none	0.127273	0.181926	0.0363636	0.702918	0.0666667	0.527089	-0.0444444	0.67329
I19066_13_seq1	I19065_12_seq1	I19058_4_seq1	I19059_5_seq2	994	1073	734	676	none	0.0485437	0.62225	0.0873786	0.375189	-0.0120482	0.912596	0.0361446	0.741934
I19066_13_seq1	I19065_12_seq1	I19058_4_seq2	I19059_5_seq1	996	1063	705	715	none	0.173077	0.0775562	0.192308	0.0498602	-0.011236	0.915583	0.011236	0.915583
I19066_13_seq1	I19065_12_seq1	I19058_4_seq2	I19059_5_seq2	995	1069	667	662	none	0.0909091	0.393769	0.272727	0.0105152	-0.0823529	0.447699	0.105882	0.328972
I19066_13_seq1	I19065_12_seq1	I19064_11_seq1	I19060_6_seq1	756	853	794	968	123	0.154088	0.000101929	0.119497	0.00258171	0.030853	0.468928	-0.00907441	0.831321
I19066_13_seq1	I19065_12_seq1	I19064_11_seq1	I19060_6_seq2	771	857	841	998	none	0.0917722	0.0210483	0.0316456	0.426289	0.063197	0.142691	-0.00743494	0.863082
I19066_13_seq1	I19065_12_seq1	I19064_11_seq1	I19061_7_seq1	747	863	809	1144	none	0.0703364	0.0720594	0.110092	0.00487131	0.00182149	0.965957	0.0491803	0.249185
I19066_13_seq1	I19065_12_seq1	I19064_11_seq1	I19061_7_seq2	740	854	838	1087	none	0.117302	0.00218868	0.0909091	0.0175917	0.0285714	0.498962	-0.00357143	0.932647
I19066_13_seq1	I19065_12_seq1	I19064_11_seq1	I19062_8_seq1	745	873	808	1101	none	0.0764618	0.048299	0.166417	1.72395e-05	0.00884956	0.833393	0.115044	0.00624617
I19066_13_seq1	I19065_12_seq1	I19064_11_seq1	I19062_8_seq2	772	867	822	1051	none	0.112985	0.00593483	0.0758853	0.0646127	0.0808824	0.0592297	0.0404412	0.345557
I19066_13_seq1	I19065_12_seq1	I19064_11_seq2	I19060_6_seq1	748	842	848	1012	123	0.132075	0.000865916	0.106918	0.00700986	0.0431779	0.298821	0.015544	0.708384
I19066_13_seq1	I19065_12_seq1	I19064_11_seq2	I19060_6_seq2	764	841	794	941	none	0.0720268	0.0784294	0.0217755	0.594688	0.0604982	0.151514	0.00711744	0.866009
I19066_13_seq1	I19065_12_seq1	I19064_11_seq2	I19061_7_seq1	743	862	810	1145	none	0.0666667	0.098274	0.118699	0.00324373	0.00881834	0.833683	0.0652557	0.120219
I19066_13_seq1	I19065_12_seq1	I19064_11_seq2	I19061_7_seq2	733	858	833	1083	123	0.11592	0.00319264	0.103555	0.00843751	0.010453	0.802251	-0.00348432	0.933471
I19066_13_seq1	I19065_12_seq1	I19064_11_seq2	I19062_8_seq1	737	868	806	1089	none	0.0474684	0.232738	0.174051	1.21118e-05	-0.0101695	0.804896	0.125424	0.00231498
I19066_13_seq1	I19065_12_seq1	I19064_11_seq2	I19062_8_seq2	756	869	834	1045	none	0.0675676	0.100178	0.0777027	0.0586793	0.0175439	0.675323	0.0280702	0.502752
I19066_13_seq1	I19065_12_seq1	I19068_16_seq1	I19067_14_seq1	666	717	872	699	none	-0.0487805	0.211522	-0.131098	0.000785837	0.0553064	0.152573	-0.0254111	0.511015
I19066_13_seq1	I19065_12_seq1	I19068_16_seq1	I19067_14_seq2	677	748	861	782	none	-0.00745156	0.846941	-0.052161	0.176644	0.0372671	0.344285	-0.00931677	0.813097
I19066_13_seq1	I19065_12_seq1	I19068_16_seq2	I19067_14_seq1	651	740	838	705	none	0.0507937	0.202341	-0.187302	2.58596e-06	0.152338	8.76294e-05	-0.0739065	0.0570402
I19066_13_seq1	I19065_12_seq1	I19068_16_seq2	I19067_14_seq2	672	765	794	751	none	0.0909091	0.0240516	-0.113636	0.00479668	0.157233	7.33166e-05	-0.0408805	0.302556
I19066_13_seq1	I19065_12_seq2	I19057_3_seq1	I19057_3_seq2	BAAAA	ABAAA	AABAA	AAABA	introgression	DFO_stat	DFO_Pvalue	DIL_stat	DIL_Pvalue	DFI_stat	DFI_Pvalue	DOL_stat	DOL_Pvalue
I19066_13_seq1	I19065_12_seq2	I19058_4_seq1	I19059_5_seq1	966	1080	665	638	none	0.0956522	0.305007	0.026087	0.779668	-0.0387597	0.659774	-0.100775	0.252381
I19066_13_seq1	I19065_12_seq2	I19058_4_seq1	I19059_5_seq2	966	1089	710	676	none	-0.125926	0.143433	0.125926	0.143433	-0.031746	0.72158	0.238095	0.00752632
I19066_13_seq1	I19065_12_seq2	I19058_4_seq2	I19059_5_seq1	968	1078	702	688	none	0.294118	0.000603644	-0.0294118	0.731601	0.286822	0.00112332	-0.0542636	0.537686
I19066_13_seq1	I19065_12_seq2	I19058_4_seq2	I19059_5_seq2	968	1114	671	660	none	0.125	0.220671	0.0833333	0.414216	0.128713	0.195821	0.0891089	0.370502
I19066_13_seq1	I19065_12_seq2	I19064_11_seq1	I19060_6_seq1	743	891	793	971	none	0.150943	0.000140863	0.0283019	0.475384	0.0683012	0.102659	-0.0683012	0.102659
I19066_13_seq1	I19065_12_seq2	I19064_11_seq1	I19060_6_seq2	759	848	842	958	none	0.143284	0.000208241	-0.0746269	0.0534004	0.163575	6.79613e-05	-0.0826307	0.0442
I19066_13_seq1	I19065_12_seq2	I19064_11_seq1	I19061_7_seq1	735	857	815	1119	none	0.127907	0.00079374	-0.0145349	0.70302	0.090604	0.0269718	-0.0738255	0.0714966
I19066_13_seq1	I19065_12_seq2	I19064_11_seq1	I19061_7_seq2	737	883	854	1089	none	0.148426	0.000126438	0.0344828	0.373163	0.0661896	0.117599	-0.0697674	0.0990403
I19066_13_seq1	I19065_12_seq2	I19064_11_seq1	I19062_8_seq1	752	854	810	1064	none	0.125356	0.000895844	-0.019943	0.597225	0.106036	0.00865662	-0.0603589	0.135067
I19066_13_seq1	I19065_12_seq2	I19064_11_seq1	I19062_8_seq2	769	883	824	1047	none	0.116358	0.00460427	0.00505902	0.901952	0.104056	0.0132207	-0.0123457	0.768779
I19066_13_seq1	I19065_12_seq2	I19064_11_seq2	I19060_6_seq1	769	837	815	1027	none	0.0640244	0.101042	0.219512	1.8848e-08	-0.105528	0.00992538	0.0653266	0.110452
I19066_13_seq1	I19065_12_seq2	I19064_11_seq2	I19060_6_seq2	783	838	801	953	none	0.067591	0.104463	0.136915	0.00100611	-0.0949914	0.0222705	-0.0259067	0.533036
I19066_13_seq1	I19065_12_seq2	I19064_11_seq2	I19061_7_seq1	760	850	822	1166	none	0.079258	0.0535996	0.17032	3.36019e-05	-0.119584	0.00407228	-0.0259965	0.532327
I19066_13_seq1	I19065_12_seq2	I19064_11_seq2	I19061_7_seq2	756	846	821	1099	none	0.0858896	0.0282981	0.205521	1.53889e-07	-0.105719	0.0111023	0.0294627	0.47912
I19066_13_seq1	I19065_12_seq2	I19064_11_seq2	I19062_8_seq1	781	846	815	1099	none	0.0521173	0.19656	0.179153	9.02776e-06	-0.128378	0.00178665	0.00337838	0.934488
I19066_13_seq1	I19065_12_seq2	I19064_11_seq2	I19062_8_seq2	784	844	805	1051	none	0.0113821	0.777739	0.203252	4.6435e-07	-0.118243	0.00401498	0.0810811	0.0485197
I19066_13_seq1	I19065_12_seq2	I19068_16_seq1	I19067_14_seq1	647	815	879	731	none	-0.0885246	0.0287866	-0.0688525	0.0890312	0.0675241	0.0921727	0.0868167	0.0303722
I19066_13_seq1	I19065_12_seq2	I19068_16_seq1	I19067_14_seq2	673	766	893	743	none	0.109792	0.00436679	-0.275964	7.80931e-13	0.18894	1.43019e-06	-0.210445	7.89757e-08
I19066_13_seq1	I19065_12_seq2	I19068_16_seq2	I19067_14_seq1	648	781	803	740	none	-0.057508	0.150193	0.0958466	0.0164812	-0.0123077	0.753684	0.135385	0.000557182
I19066_13_seq1	I19065_12_seq2	I19068_16_seq2	I19067_14_seq2	682	738	794	725	none	0.137931	0.000494066	-0.137931	0.000494066	0.10479	0.00676123	-0.158683	4.10901e-05
I19066_13_seq2	I19065_12_seq1	I19057_3_seq1	I19057_3_seq2	BAAAA	ABAAA	AABAA	AAABA	introgression	DFO_stat	DFO_Pvalue	DIL_stat	DIL_Pvalue	DFI_stat	DFI_Pvalue	DOL_stat	DOL_Pvalue
I19066_13_seq2	I19065_12_seq1	I19058_4_seq1	I19059_5_seq1	1101	1082	671	634	none	0.132075	0.173893	0.0377358	0.697635	0.060241	0.583128	-0.060241	0.583128
I19066_13_seq2	I19065_12_seq1	I19058_4_seq1	I19059_5_seq2	1102	1086	739	676	none	0.0909091	0.365712	0.111111	0.268925	-0.0126582	0.91042	0.0126582	0.91042
I19066_13_seq2	I19065_12_seq1	I19058_4_seq2	I19059_5_seq1	1097	1082	706	714	none	0.307692	0.00170187	0.153846	0.116664	0.108434	0.323212	-0.0843373	0.442279
I19066_13_seq2	I19065_12_seq1	I19058_4_seq2	I19059_5_seq2	1101	1087	670	663	none	0.317073	0.00408891	0.268293	0.0151199	0.0649351	0.568811	0.012987	0.909269
I19066_13_seq2	I19065_12_seq1	I19064_11_seq1	I19060_6_seq1	883	846	805	966	none	0.0597738	0.136974	0.150242	0.000185501	-0.0297398	0.490314	0.0743494	0.0846136
I19066_13_seq2	I19065_12_seq1	I19064_11_seq1	I19060_6_seq2	872	853	852	979	none	-0.0253968	0.523828	0.0825397	0.0382907	-0.0297398	0.490314	0.0966543	0.0249692
I19066_13_seq2	I19065_12_seq1	I19064_11_seq1	I19061_7_seq1	863	856	825	1140	none	-0.0157233	0.691717	0.154088	0.000101929	-0.047619	0.275234	0.158095	0.000291863
I19066_13_seq2	I19065_12_seq1	I19064_11_seq1	I19061_7_seq2	876	857	860	1095	none	0.0547731	0.166181	0.12989	0.00102552	-0.015625	0.723674	0.078125	0.0770999
I19066_13_seq2	I19065_12_seq1	I19064_11_seq1	I19062_8_seq1	869	869	813	1105	none	-0.0382848	0.327913	0.185299	2.18952e-06	-0.0766423	0.0727891	0.189781	8.88536e-06
I19066_13_seq2	I19065_12_seq1	I19064_11_seq1	I19062_8_seq2	883	871	829	1035	none	-0.0254669	0.536533	0.117148	0.00446777	-0.0416667	0.338352	0.117424	0.00697148
I19066_13_seq2	I19065_12_seq1	I19064_11_seq2	I19060_6_seq1	838	876	821	1024	none	0.249617	1.78617e-10	0.0566616	0.147639	0.174603	3.21596e-05	-0.047619	0.256839
I19066_13_seq2	I19065_12_seq1	I19064_11_seq2	I19060_6_seq2	839	877	778	947	none	0.178218	1.14819e-05	-0.00660066	0.870921	0.188406	9.57593e-06	-0.0144928	0.733478
I19066_13_seq2	I19065_12_seq1	I19064_11_seq2	I19061_7_seq1	829	893	796	1159	none	0.165049	4.07754e-05	0.0873786	0.0298407	0.131725	0.00222681	0.0426716	0.321842
I19066_13_seq2	I19065_12_seq1	I19064_11_seq2	I19061_7_seq2	838	889	824	1108	none	0.230525	7.40249e-09	0.0651828	0.102096	0.153558	0.000387451	-0.0411985	0.34108
I19066_13_seq2	I19065_12_seq1	I19064_11_seq2	I19062_8_seq1	844	913	794	1123	13	0.153971	0.000131008	0.124797	0.00193584	0.113971	0.00785527	0.0808824	0.0592297
I19066_13_seq2	I19065_12_seq1	I19064_11_seq2	I19062_8_seq2	847	906	821	1058	none	0.170068	3.72461e-05	0.0408163	0.3223	0.139706	0.00112013	0	1
I19066_13_seq2	I19065_12_seq1	I19068_16_seq1	I19067_14_seq1	774	716	861	714	none	-0.00469484	0.90553	-0.14554	0.000234129	0.0457317	0.241477	-0.0914634	0.0191496
I19066_13_seq2	I19065_12_seq1	I19068_16_seq1	I19067_14_seq2	761	757	871	778	none	-0.153614	7.54637e-05	-0.0060241	0.87664	-0.0216049	0.582339	0.12963	0.000967428
I19066_13_seq2	I19065_12_seq1	I19068_16_seq2	I19067_14_seq1	771	748	839	726	none	0.178631	1.23169e-05	-0.225376	3.469e-08	0.222395	1.70674e-08	-0.153966	9.45458e-05
I19066_13_seq2	I19065_12_seq1	I19068_16_seq2	I19067_14_seq2	765	790	816	752	none	0.00837521	0.837856	-0.078727	0.054407	0.160572	5.64609e-05	0.0779014	0.0507298
I19066_13_seq2	I19065_12_seq2	I19057_3_seq1	I19057_3_seq2	BAAAA	ABAAA	AABAA	AAABA	introgression	DFO_stat	DFO_Pvalue	DIL_stat	DIL_Pvalue	DFI_stat	DFI_Pvalue	DOL_stat	DOL_Pvalue
I19066_13_seq2	I19065_12_seq2	I19058_4_seq1	I19059_5_seq1	1016	1038	666	631	none	0.113043	0.225414	0.0434783	0.641035	-0.03125	0.723674	-0.09375	0.288844
I19066_13_seq2	I19065_12_seq2	I19058_4_seq1	I19059_5_seq2	1021	1049	713	673	none	-0.114504	0.190008	0.145038	0.0969069	-0.0247934	0.785063	0.256198	0.00482965
I19066_13_seq2	I19065_12_seq2	I19058_4_seq2	I19059_5_seq1	1015	1041	702	686	none	0.397059	3.64851e-06	-0.0588235	0.492717	0.396825	8.41462e-06	-0.0952381	0.285049
I19066_13_seq2	I19065_12_seq2	I19058_4_seq2	I19059_5_seq2	1018	1076	669	658	none	0.270833	0.00796349	0.0416667	0.683091	0.272727	0.00665561	0.0505051	0.615303
I19066_13_seq2	I19065_12_seq2	I19064_11_seq1	I19060_6_seq1	835	852	819	980	none	0.0761421	0.064162	0.0795262	0.0531966	0.0177515	0.689375	0.0216963	0.625176
I19066_13_seq2	I19065_12_seq2	I19064_11_seq1	I19060_6_seq2	832	819	860	954	none	0.0280374	0.477454	-0.0249221	0.527734	0.0919325	0.033802	0.0281426	0.515872
I19066_13_seq2	I19065_12_seq2	I19064_11_seq1	I19061_7_seq1	822	823	835	1131	none	0.0479134	0.222945	0.0200927	0.609293	0.0597015	0.166914	0.0261194	0.545373
I19066_13_seq2	I19065_12_seq2	I19064_11_seq1	I19061_7_seq2	834	850	867	1103	none	0.0752	0.0601081	0.0592	0.138873	0.0340681	0.446642	0.0140281	0.754005
I19066_13_seq2	I19065_12_seq2	I19064_11_seq1	I19062_8_seq1	846	823	839	1080	none	0.0492308	0.209427	0.0246154	0.530285	0.0411985	0.34108	0.011236	0.795137
I19066_13_seq2	I19065_12_seq2	I19064_11_seq1	I19062_8_seq2	842	850	839	1036	none	-0.0017452	0.966678	0.0645724	0.122178	-0.00196464	0.964646	0.0726916	0.101006
I19066_13_seq2	I19065_12_seq2	I19064_11_seq2	I19060_6_seq1	804	817	786	1044	123	0.164671	2.08091e-05	0.158683	4.10901e-05	0.0243902	0.558986	0.0174216	0.676392
I19066_13_seq2	I19065_12_seq2	I19064_11_seq2	I19060_6_seq2	804	820	769	961	none	0.133779	0.00107	0.0769231	0.0599611	0.0301954	0.473705	-0.0301954	0.473705
I19066_13_seq2	I19065_12_seq2	I19064_11_seq2	I19061_7_seq1	790	824	788	1173	123	0.152979	0.000137725	0.111111	0.00562503	0.00175747	0.966561	-0.0439367	0.294613
I19066_13_seq2	I19065_12_seq2	I19064_11_seq2	I19061_7_seq2	808	826	793	1120	123	0.167683	1.74868e-05	0.143293	0.000242471	0.0326087	0.443598	0.00362319	0.932161
I19066_13_seq2	I19065_12_seq2	I19064_11_seq2	I19062_8_seq1	817	821	789	1121	123	0.145161	0.000300943	0.112903	0.00493467	-0.00527241	0.899917	-0.0404218	0.334941
I19066_13_seq2	I19065_12_seq2	I19064_11_seq2	I19062_8_seq2	812	817	778	1059	none	0.089172	0.0254408	0.143312	0.000328918	0.00347222	0.933586	0.0625	0.133614
I19066_13_seq2	I19065_12_seq2	I19068_16_seq1	I19067_14_seq1	720	774	878	733	none	-0.0117253	0.774502	-0.0820771	0.0449164	0.0750436	0.0724387	0.0017452	0.966678
I19066_13_seq2	I19065_12_seq2	I19068_16_seq1	I19067_14_seq2	735	746	915	740	none	-0.0304878	0.43488	-0.231707	2.94557e-09	0.145729	0.000369906	-0.0753769	0.065515
I19066_13_seq2	I19065_12_seq2	I19068_16_seq2	I19067_14_seq1	715	732	797	763	none	0.0584307	0.152699	0.0350584	0.390872	0.0636215	0.115211	0.040783	0.31262
I19066_13_seq2	I19065_12_seq2	I19068_16_seq2	I19067_14_seq2	733	713	807	738	none	0.0325733	0.419589	-0.136808	0.000699018	0.121019	0.00242352	-0.044586	0.263857
I19066_13_seq2	I19066_13_seq1	I19057_3_seq1	I19057_3_seq2	BAAAA	ABAAA	AABAA	AAABA	introgression	DFO_stat	DFO_Pvalue	DIL_stat	DIL_Pvalue	DFI_stat	DFI_Pvalue	DOL_stat	DOL_Pvalue
I19066_13_seq2	I19066_13_seq1	I19058_4_seq1	I19059_5_seq1	813	710	693	656	none	0.145455	0.127124	0.127273	0.181926	0.0724638	0.547221	0.0434783	0.717982
I19066_13_seq2	I19066_13_seq1	I19058_4_seq1	I19059_5_seq2	817	709	758	698	none	0.0909091	0.340356	0.0727273	0.445601	0.0909091	0.460181	0.0606061	0.622461
I19066_13_seq2	I19066_13_seq1	I19058_4_seq2	I19058_4_seq1	854	746	624	666	none	0.196078	0.0476704	-0.0980392	0.322102	0.265823	0.0181431	-0.113924	0.311261
I19066_13_seq2	I19066_13_seq1	I19058_4_seq2	I19059_5_seq1	806	711	743	733	none	0.296296	0.00207556	0.111111	0.248213	0.232877	0.046624	-0.0410959	0.725496
I19066_13_seq2	I19066_13_seq1	I19058_4_seq2	I19059_5_seq2	810	710	706	683	none	0.257732	0.0111372	0.0515464	0.611683	0.25	0.0338949	-0.0277778	0.813664
I19066_13_seq2	I19066_13_seq1	I19059_5_seq1	I19059_5_seq2	832	735	610	575	none	-0.0549451	0.600179	-0.0549451	0.600179	0.130435	0.210903	0.130435	0.210903
I19066_13_seq2	I19066_13_seq1	I19064_11_seq1	I19060_6_seq1	705	555	839	1035	none	0.0253165	0.524486	0.142405	0.000343584	-0.0686275	0.165684	0.112745	0.022766
I19066_13_seq2	I19066_13_seq1	I19064_11_seq1	I19060_6_seq2	683	563	885	1050	none	-0.05939	0.138241	0.104334	0.00920971	-0.112195	0.0230999	0.136585	0.00568107
I19066_13_seq2	I19066_13_seq1	I19064_11_seq1	I19061_7_seq1	693	554	872	1209	none	-0.0170015	0.665411	0.100464	0.0106062	-0.0521092	0.295522	0.136476	0.00614868
I19066_13_seq2	I19066_13_seq1	I19064_11_seq1	I19061_7_seq2	697	543	900	1151	none	0.0545455	0.161125	0.145455	0.000186381	-0.0471464	0.343915	0.101737	0.0411163
I19066_13_seq2	I19066_13_seq1	I19064_11_seq1	I19062_8_seq1	699	553	865	1151	none	-0.0355487	0.365877	0.106646	0.00667436	-0.111111	0.0237731	0.111111	0.0237731
I19066_13_seq2	I19066_13_seq1	I19064_11_seq1	I19062_8_seq2	698	570	878	1106	none	-0.0509666	0.224083	0.128295	0.00221101	-0.152882	0.00225948	0.102757	0.0401146
I19066_13_seq2	I19066_13_seq1	I19064_11_seq1	I19064_11_seq2	680	572	742	699	none	-0.279022	6.3005e-10	0.11609	0.0101004	-0.194805	2.82443e-05	0.225108	1.30811e-06
I19066_13_seq2	I19066_13_seq1	I19064_11_seq2	I19060_6_seq1	663	592	859	1096	none	0.239303	1.84138e-09	0.0522979	0.188944	0.191489	8.20422e-05	-0.0874704	0.0720184
I19066_13_seq2	I19066_13_seq1	I19064_11_seq2	I19060_6_seq2	658	603	820	1027	none	0.16609	6.52223e-05	0.0207612	0.617685	0.183168	0.000231741	-0.0247525	0.618823
I19066_13_seq2	I19066_13_seq1	I19064_11_seq2	I19061_7_seq1	663	594	844	1229	none	0.18	1.0381e-05	0.0333333	0.414216	0.178218	0.000340799	-0.039604	0.426015
I19066_13_seq2	I19066_13_seq1	I19064_11_seq2	I19061_7_seq2	665	572	861	1162	none	0.243328	8.18367e-10	0.0800628	0.0433115	0.197115	5.81042e-05	-0.0528846	0.280749
I19066_13_seq2	I19066_13_seq1	I19064_11_seq2	I19062_8_seq1	674	597	843	1163	none	0.185811	6.15563e-06	0.0202703	0.621873	0.17734	0.000352511	-0.0640394	0.196926
I19066_13_seq2	I19066_13_seq1	I19064_11_seq2	I19062_8_seq2	671	598	859	1114	none	0.175439	2.80756e-05	0.0175439	0.675323	0.178484	0.000306649	-0.0415648	0.400574
I19066_13_seq2	I19066_13_seq1	I19065_12_seq1	I19065_12_seq2	601	527	733	703	none	-0.12769	0.000748645	0.0645624	0.0882884	-0.0685413	0.102056	0.16696	6.81634e-05
I19066_13_seq2	I19066_13_seq1	I19067_14_seq1	I19067_14_seq2	660	553	682	706	none	-0.186555	5.35043e-06	0.152941	0.000190997	-0.166987	0.000138104	0.220729	4.69828e-07
I19066_13_seq2	I19066_13_seq1	I19068_16_seq1	I19067_14_seq1	631	506	917	780	none	-0.0328947	0.417304	-0.0921053	0.0231409	-0.0167364	0.714431	-0.0920502	0.0441659
I19066_13_seq2	I19066_13_seq1	I19068_16_seq1	I19067_14_seq2	608	520	923	822	none	-0.175573	7.00878e-06	0.0473282	0.225792	-0.095723	0.033915	0.201629	7.90254e-06
I19066_13_seq2	I19066_13_seq1	I19068_16_seq2	I19067_14_seq1	630	507	875	793	none	0.122278	0.00281093	-0.0485762	0.235271	0.0924025	0.0414356	-0.117043	0.0097969
I19066_13_seq2	I19066_13_seq1	I19068_16_seq2	I19067_14_seq2	615	539	862	810	none	-0.0428816	0.300485	0.0943396	0.0227345	-0.00209644	0.96348	0.165618	0.000297851
I19066_13_seq2	I19066_13_seq1	I19068_16_seq2	I19068_16_seq1	644	519	632	710	none	0.16763	0.000134061	0.044316	0.312693	0.104034	0.0239581	-0.0318471	0.489463
I19067_14_seq1	I19065_12_seq1	I19057_3_seq1	I19057_3_seq2	BAAAA	ABAAA	AABAA	AAABA	introgression	DFO_stat	DFO_Pvalue	DIL_stat	DIL_Pvalue	DFI_stat	DFI_Pvalue	DOL_stat	DOL_Pvalue
I19067_14_seq1	I19065_12_seq1	I19064_11_seq1	I19060_6_seq1	844	889	817	995	none	0.0664506	0.0988207	0.128039	0.00147062	0.0506567	0.242202	0.121951	0.00487071
I19067_14_seq1	I19065_12_seq1	I19064_11_seq1	I19060_6_seq2	850	881	855	1023	none	0.0586371	0.140765	0.0332805	0.403157	0.0919325	0.033802	0.0619137	0.152893
I19067_14_seq1	I19065_12_seq1	I19064_11_seq1	I19061_7_seq1	822	879	819	1180	none	0.117284	0.00283058	0.095679	0.0148675	0.0964083	0.0265964	0.0699433	0.107683
I19067_14_seq1	I19065_12_seq1	I19064_11_seq1	I19061_7_seq2	838	883	850	1137	none	0.170732	1.22626e-05	0.0579268	0.137902	0.131115	0.00303762	-0.0136986	0.756818
I19067_14_seq1	I19065_12_seq1	I19064_11_seq1	I19062_8_seq1	840	892	821	1127	none	0.0597015	0.122265	0.155224	5.87264e-05	0.0361011	0.395482	0.151625	0.000358595
I19067_14_seq1	I19065_12_seq1	I19064_11_seq1	I19062_8_seq2	841	896	842	1055	none	0.0257235	0.521171	0.11254	0.0050045	0.0383912	0.369241	0.137112	0.00134235
I19067_14_seq1	I19065_12_seq1	I19064_11_seq2	I19060_6_seq1	843	869	882	1030	none	-0.0108865	0.782507	0.129082	0.00106337	-0.0212766	0.613354	0.138298	0.00102202
I19067_14_seq1	I19065_12_seq1	I19064_11_seq2	I19060_6_seq2	855	870	827	966	none	-0.0215589	0.596527	0.0381426	0.348948	0.0109091	0.798074	0.0763636	0.0733116
I19067_14_seq1	I19065_12_seq1	I19064_11_seq2	I19061_7_seq1	829	862	833	1174	none	0.031746	0.425556	0.120635	0.00246249	0.0018018	0.966142	0.102703	0.0155412
I19067_14_seq1	I19065_12_seq1	I19064_11_seq2	I19061_7_seq2	842	866	856	1125	none	0.0914826	0.0212522	0.0788644	0.0470607	0.035514	0.411395	0.0205607	0.63438
I19067_14_seq1	I19065_12_seq1	I19064_11_seq2	I19062_8_seq1	840	884	826	1109	none	-0.00923077	0.813945	0.169231	1.59925e-05	-0.0469565	0.260175	0.154783	0.000205989
I19067_14_seq1	I19065_12_seq1	I19064_11_seq2	I19062_8_seq2	834	877	864	1046	none	-0.0511182	0.200905	0.121406	0.00238493	-0.0410959	0.320648	0.143836	0.000509057
I19067_14_seq1	I19065_12_seq2	I19057_3_seq1	I19057_3_seq2	BAAAA	ABAAA	AABAA	AAABA	introgression	DFO_stat	DFO_Pvalue	DIL_stat	DIL_Pvalue	DFI_stat	DFI_Pvalue	DOL_stat	DOL_Pvalue
I19067_14_seq1	I19065_12_seq2	I19064_11_seq1	I19060_6_seq1	878	981	816	985	none	0.0845295	0.0342924	0.030303	0.44798	0.0975207	0.0164538	0.0413223	0.309442
I19067_14_seq1	I19065_12_seq2	I19064_11_seq1	I19060_6_seq2	885	927	854	972	none	0.126471	0.000973937	-0.0823529	0.0317533	0.1875	2.10144e-06	-0.034375	0.384505
I19067_14_seq1	I19065_12_seq2	I19064_11_seq1	I19061_7_seq1	861	932	815	1147	none	0.170732	6.56125e-06	-0.0588235	0.120427	0.182965	4.08621e-06	-0.0694006	0.080557
I19067_14_seq1	I19065_12_seq2	I19064_11_seq1	I19061_7_seq2	876	954	851	1115	none	0.210059	4.72026e-08	-0.0414201	0.281515	0.178451	1.36615e-05	-0.107744	0.00864071
I19067_14_seq1	I19065_12_seq2	I19064_11_seq1	I19062_8_seq1	884	921	824	1072	none	0.141667	0.00014393	-0.0333333	0.371093	0.138973	0.000349317	-0.0513595	0.186352
I19067_14_seq1	I19065_12_seq2	I19064_11_seq1	I19062_8_seq2	880	964	837	1038	none	0.0452418	0.252031	0.0140406	0.722231	0.0766773	0.055052	0.0447284	0.263095
I19067_14_seq1	I19065_12_seq2	I19064_11_seq2	I19060_6_seq1	901	914	842	1033	none	-0.0707965	0.0652664	0.221239	8.37582e-09	-0.145511	0.000216979	0.160991	4.27991e-05
I19067_14_seq1	I19065_12_seq2	I19064_11_seq2	I19060_6_seq2	914	908	826	967	none	-0.0282862	0.488031	0.12812	0.00168432	-0.121019	0.00242352	0.0286624	0.472586
I19067_14_seq1	I19065_12_seq2	I19064_11_seq2	I19061_7_seq1	897	913	836	1188	none	0.0339257	0.398635	0.137318	0.00063446	-0.103896	0.0099192	0	1
I19067_14_seq1	I19065_12_seq2	I19064_11_seq2	I19061_7_seq2	905	902	832	1119	none	0.0686567	0.075546	0.140299	0.000281738	-0.0601626	0.135703	0.0178862	0.657359
I19067_14_seq1	I19065_12_seq2	I19064_11_seq2	I19062_8_seq1	907	901	824	1100	none	0.00456621	0.906827	0.153729	8.13508e-05	-0.142424	0.000253256	0.00606061	0.87627
I19067_14_seq1	I19065_12_seq2	I19064_11_seq2	I19062_8_seq2	902	904	825	1047	none	-0.107089	0.0058261	0.197587	3.62588e-07	-0.149321	0.00012063	0.155354	6.3292e-05
I19067_14_seq1	I19066_13_seq1	I19057_3_seq1	I19057_3_seq2	BAAAA	ABAAA	AABAA	AAABA	introgression	DFO_stat	DFO_Pvalue	DIL_stat	DIL_Pvalue	DFI_stat	DFI_Pvalue	DOL_stat	DOL_Pvalue
I19067_14_seq1	I19066_13_seq1	I19064_11_seq1	I19060_6_seq1	832	793	795	980	none	0.0120482	0.756211	0.105422	0.00659708	0.0142349	0.73577	0.124555	0.00314935
I19067_14_seq1	I19066_13_seq1	I19064_11_seq1	I19060_6_seq2	825	782	830	1012	none	0.0197269	0.61257	0.047041	0.227206	0.0294627	0.47912	0.0606586	0.145097
I19067_14_seq1	I19066_13_seq1	I19064_11_seq1	I19061_7_seq1	825	778	808	1161	none	0.0948905	0.013009	0.0394161	0.302252	0.0851064	0.0432627	0.0177305	0.6737
I19067_14_seq1	I19066_13_seq1	I19064_11_seq1	I19061_7_seq2	825	762	833	1100	none	0.171631	5.18589e-06	0.0751773	0.0459235	0.0979021	0.0192076	-0.020979	0.615847
I19067_14_seq1	I19066_13_seq1	I19064_11_seq1	I19062_8_seq1	829	771	802	1088	none	0.07173	0.0557929	0.0604782	0.106826	0.03	0.462433	0.0166667	0.683091
I19067_14_seq1	I19066_13_seq1	I19064_11_seq1	I19062_8_seq2	828	804	824	1043	none	-0.0143084	0.719705	0.0937997	0.0186485	-0.0366492	0.38033	0.0820244	0.0495935
I19067_14_seq1	I19066_13_seq1	I19064_11_seq2	I19060_6_seq1	839	801	864	1020	none	-0.00628931	0.873976	0.122642	0.0019821	-0.0362319	0.394627	0.112319	0.00831767
I19067_14_seq1	I19066_13_seq1	I19064_11_seq2	I19060_6_seq2	846	801	814	967	none	-0.00168067	0.967299	0.0756303	0.0650637	-0.0221402	0.606243	0.0627306	0.144173
I19067_14_seq1	I19066_13_seq1	I19064_11_seq2	I19061_7_seq1	836	781	820	1156	none	0.0620032	0.119938	0.0715421	0.0727705	0.0125224	0.767178	0.0232558	0.582428
I19067_14_seq1	I19066_13_seq1	I19064_11_seq2	I19061_7_seq2	835	762	836	1088	123	0.148485	0.000136379	0.106061	0.00643509	0.0421053	0.314777	-0.00701754	0.866944
I19067_14_seq1	I19066_13_seq1	I19064_11_seq2	I19062_8_seq1	843	791	819	1075	none	0.0623053	0.114411	0.0778816	0.0484565	-0.0155979	0.707902	0.0017331	0.966793
I19067_14_seq1	I19066_13_seq1	I19064_11_seq2	I19062_8_seq2	839	801	845	1025	none	-0.0309951	0.442842	0.0995106	0.0137486	-0.0401396	0.336633	0.0994764	0.0172559
I19067_14_seq1	I19066_13_seq2	I19057_3_seq1	I19057_3_seq2	BAAAA	ABAAA	AABAA	AAABA	introgression	DFO_stat	DFO_Pvalue	DIL_stat	DIL_Pvalue	DFI_stat	DFI_Pvalue	DOL_stat	DOL_Pvalue
I19067_14_seq1	I19066_13_seq2	I19064_11_seq1	I19060_6_seq1	843	947	816	974	none	0.0451011	0.252769	0.0419907	0.286977	0.0594406	0.155139	0.0559441	0.180901
I19067_14_seq1	I19066_13_seq2	I19064_11_seq1	I19060_6_seq2	843	911	850	988	none	0.0691244	0.0777843	-0.0414747	0.289958	0.10101	0.013823	-0.020202	0.622461
I19067_14_seq1	I19066_13_seq2	I19064_11_seq1	I19061_7_seq1	841	926	818	1152	none	0.117647	0.00215598	-0.0441176	0.24996	0.113367	0.00585109	-0.072758	0.07693
I19067_14_seq1	I19066_13_seq2	I19064_11_seq1	I19061_7_seq2	853	932	847	1105	none	0.182222	2.19843e-06	-0.00148148	0.969297	0.126316	0.00256346	-0.0912281	0.029403
I19067_14_seq1	I19066_13_seq2	I19064_11_seq1	I19062_8_seq1	850	927	826	1086	none	0.105263	0.00590539	-0.0233918	0.540686	0.101161	0.0129875	-0.0447761	0.271539
I19067_14_seq1	I19066_13_seq2	I19064_11_seq1	I19062_8_seq2	854	945	834	1020	none	0.0237718	0.550414	-0.0269414	0.498559	0.0662139	0.108062	0.0118846	0.773018
I19067_14_seq1	I19066_13_seq2	I19064_11_seq2	I19060_6_seq1	870	894	824	1024	none	-0.074184	0.0541134	0.237389	7.13932e-10	-0.171053	2.46745e-05	0.174342	1.71673e-05
I19067_14_seq1	I19066_13_seq2	I19064_11_seq2	I19060_6_seq2	882	881	783	963	none	-0.0543131	0.174174	0.166134	3.22911e-05	-0.145729	0.000369906	0.0854271	0.0368618
I19067_14_seq1	I19066_13_seq2	I19064_11_seq2	I19061_7_seq1	883	887	789	1162	none	0.00152207	0.968879	0.153729	8.13508e-05	-0.111481	0.00627628	0.0549085	0.178271
I19067_14_seq1	I19066_13_seq2	I19064_11_seq2	I19061_7_seq2	881	886	805	1104	none	0.0700447	0.0696139	0.186289	1.39602e-06	-0.0954774	0.0196558	0.0351759	0.39008
I19067_14_seq1	I19066_13_seq2	I19064_11_seq2	I19062_8_seq1	885	897	794	1092	none	-0.00459418	0.906544	0.17611	6.78583e-06	-0.134426	0.000899907	0.0590164	0.144952
I19067_14_seq1	I19066_13_seq2	I19064_11_seq2	I19062_8_seq2	885	904	818	1034	none	-0.0955414	0.0166539	0.175159	1.13623e-05	-0.152709	0.000164198	0.126437	0.0018073
I19067_14_seq1	I19067_14_seq2	I19057_3_seq1	I19057_3_seq2	BAAAA	ABAAA	AABAA	AAABA	introgression	DFO_stat	DFO_Pvalue	DIL_stat	DIL_Pvalue	DFI_stat	DFI_Pvalue	DOL_stat	DOL_Pvalue
I19067_14_seq1	I19067_14_seq2	I19058_4_seq1	I19059_5_seq1	868	885	703	658	none	0.0275229	0.773846	0.174312	0.0687788	-0.275862	0.00296711	-0.137931	0.137395
I19067_14_seq1	I19067_14_seq2	I19058_4_seq1	I19059_5_seq2	877	884	752	713	none	-0.1875	0.0338949	0.25	0.00467773	-0.218182	0.0221195	0.290909	0.0022802
I19067_14_seq1	I19067_14_seq2	I19058_4_seq2	I19058_4_seq1	932	926	635	651	none	0.25	0.00815097	-0.160714	0.088973	0.22807	0.0148867	-0.175439	0.0610447
I19067_14_seq1	I19067_14_seq2	I19058_4_seq2	I19059_5_seq1	866	885	758	707	none	0.235294	0.00606997	0.0294118	0.731601	0.116667	0.201243	-0.116667	0.201243
I19067_14_seq1	I19067_14_seq2	I19058_4_seq2	I19059_5_seq2	878	908	727	692	none	0.0337079	0.750485	0.191011	0.071546	-0.0574713	0.59192	0.103448	0.334594
I19067_14_seq1	I19067_14_seq2	I19059_5_seq1	I19059_5_seq2	895	907	598	594	none	-0.236364	0.013175	0.127273	0.181926	-0.137931	0.137395	0.206897	0.0258576
I19067_14_seq1	I19067_14_seq2	I19064_11_seq1	I19060_6_seq1	705	780	872	1041	none	0.0658106	0.100459	0.0690209	0.0849322	0.029661	0.519315	0.0338983	0.461451
I19067_14_seq1	I19067_14_seq2	I19064_11_seq1	I19060_6_seq2	711	736	898	1042	none	0.101056	0.00926645	-0.0346908	0.371725	0.123016	0.00575014	-0.0555556	0.212317
I19067_14_seq1	I19067_14_seq2	I19064_11_seq1	I19061_7_seq1	686	739	866	1215	none	0.142442	0.000186811	0.0290698	0.445766	0.116832	0.00865306	-0.0376238	0.397838
I19067_14_seq1	I19067_14_seq2	I19064_11_seq1	I19061_7_seq2	697	747	895	1171	none	0.204611	7.03612e-08	0.0403458	0.287843	0.137014	0.00244679	-0.0961145	0.0335521
I19067_14_seq1	I19067_14_seq2	I19064_11_seq1	I19062_8_seq1	696	734	876	1136	none	0.123563	0.00111482	0.0316092	0.404333	0.11068	0.0120144	-0.0135922	0.757735
I19067_14_seq1	I19067_14_seq2	I19064_11_seq1	I19062_8_seq2	707	759	887	1096	none	0.0489731	0.217897	0.00473934	0.905086	0.0810811	0.0753633	0.022869	0.615979
I19067_14_seq1	I19067_14_seq2	I19064_11_seq1	I19064_11_seq2	727	747	723	708	none	0.13271	0.00214347	-0.128972	0.00285317	0.16791	0.00010132	-0.0932836	0.0307981
I19067_14_seq1	I19067_14_seq2	I19064_11_seq2	I19060_6_seq1	727	732	902	1080	none	-0.047041	0.227206	0.162367	3.07111e-05	-0.114688	0.010564	0.162978	0.000279769
I19067_14_seq1	I19067_14_seq2	I19064_11_seq2	I19060_6_seq2	734	732	873	1027	none	-0.0101351	0.805219	0.0709459	0.0843134	-0.111111	0.0143059	-0.0123457	0.785495
I19067_14_seq1	I19067_14_seq2	I19064_11_seq2	I19061_7_seq1	713	730	882	1236	none	0.0468498	0.243773	0.134087	0.000849774	-0.0897959	0.046843	0.0204082	0.651446
I19067_14_seq1	I19067_14_seq2	I19064_11_seq2	I19061_7_seq2	725	712	878	1163	123	0.109145	0.00448381	0.138643	0.00030614	-0.0120482	0.788032	0.0281124	0.530427
I19067_14_seq1	I19067_14_seq2	I19064_11_seq2	I19062_8_seq1	711	721	870	1138	none	0.0310559	0.430632	0.130435	0.000932747	-0.0905588	0.0391059	0.0327553	0.455536
I19067_14_seq1	I19067_14_seq2	I19064_11_seq2	I19062_8_seq2	727	721	882	1090	none	-0.0549451	0.165518	0.0957614	0.015653	-0.0674603	0.129904	0.123016	0.00575014
I19067_14_seq1	I19067_14_seq2	I19065_12_seq1	I19065_12_seq2	668	672	741	756	none	0.238381	7.4368e-10	-0.214393	3.07728e-08	0.219589	3.29948e-08	-0.257504	9.25356e-11
I19067_14_seq1	I19067_14_seq2	I19066_13_seq1	I19065_12_seq1	609	697	746	828	none	-0.0348837	0.360196	-0.00290698	0.939221	0.0423453	0.294052	0.0781759	0.0527304
I19067_14_seq1	I19067_14_seq2	I19066_13_seq1	I19065_12_seq2	658	654	751	860	none	0.19708	2.49489e-07	-0.20292	1.09075e-07	0.208609	2.94603e-07	-0.245033	1.72238e-09
I19067_14_seq1	I19067_14_seq2	I19066_13_seq2	I19065_12_seq1	642	674	850	842	none	-0.155425	4.92939e-05	0.14956	9.39212e-05	-0.18928	3.74992e-06	0.159129	0.000101036
I19067_14_seq1	I19067_14_seq2	I19066_13_seq2	I19065_12_seq2	680	632	804	816	none	0.0681115	0.0834238	-0.0464396	0.237867	-0.0453782	0.268341	-0.169748	3.46404e-05
I19067_14_seq2	I19065_12_seq1	I19057_3_seq1	I19057_3_seq2	BAAAA	ABAAA	AABAA	AAABA	introgression	DFO_stat	DFO_Pvalue	DIL_stat	DIL_Pvalue	DFI_stat	DFI_Pvalue	DOL_stat	DOL_Pvalue
I19067_14_seq2	I19065_12_seq1	I19064_11_seq1	I19060_6_seq1	916	892	817	996	none	0.0500808	0.212766	0.134087	0.000849774	0.00682594	0.868756	0.0955631	0.020704
I19067_14_seq2	I19065_12_seq1	I19064_11_seq1	I19060_6_seq2	889	894	855	985	none	-0.0254111	0.511015	0.0792227	0.0404525	-0.0230263	0.570188	0.0921053	0.0231409
I19067_14_seq2	I19065_12_seq1	I19064_11_seq1	I19061_7_seq1	883	894	827	1153	none	0.0266272	0.488744	0.153846	6.33425e-05	-0.029703	0.464657	0.112211	0.00573937
I19067_14_seq2	I19065_12_seq1	I19064_11_seq1	I19061_7_seq2	900	897	858	1111	none	0.0478955	0.208681	0.114659	0.0026154	-0.00505902	0.901952	0.0725126	0.0774297
I19067_14_seq2	I19065_12_seq1	I19064_11_seq1	I19062_8_seq1	886	908	817	1107	none	-0.0241135	0.522006	0.177305	2.50439e-06	-0.0685805	0.0859327	0.157895	7.69586e-05
I19067_14_seq2	I19065_12_seq1	I19064_11_seq1	I19062_8_seq2	903	909	836	1053	none	-0.0202177	0.608182	0.11353	0.00399142	-0.0363036	0.371488	0.105611	0.0093272
I19067_14_seq2	I19065_12_seq1	I19064_11_seq2	I19060_6_seq1	867	905	837	1041	none	0.122449	0.00134064	0.0466472	0.221796	0.08125	0.0398326	0	1
I19067_14_seq2	I19065_12_seq1	I19064_11_seq2	I19060_6_seq2	877	899	811	967	none	0.0584416	0.146924	0.00324675	0.935774	0.111111	0.00562503	0.0563607	0.16017
I19067_14_seq2	I19065_12_seq1	I19064_11_seq2	I19061_7_seq1	866	902	821	1180	none	0.0903427	0.0220749	0.0996885	0.0115409	0.0771654	0.0518345	0.0866142	0.0290647
I19067_14_seq2	I19065_12_seq1	I19064_11_seq2	I19061_7_seq2	859	911	822	1111	none	0.109195	0.00396702	0.0574713	0.12947	0.0534591	0.177598	-0.00314465	0.93679
I19067_14_seq2	I19065_12_seq1	I19064_11_seq2	I19062_8_seq1	869	922	807	1123	none	0.0512048	0.187017	0.123494	0.00146152	0.0446841	0.254975	0.118644	0.00250684
I19067_14_seq2	I19065_12_seq1	I19064_11_seq2	I19062_8_seq2	857	920	819	1053	none	0.0477612	0.216359	0.0477612	0.216359	0.0303951	0.435579	0.0303951	0.435579
I19067_14_seq2	I19065_12_seq2	I19057_3_seq1	I19057_3_seq2	BAAAA	ABAAA	AABAA	AAABA	introgression	DFO_stat	DFO_Pvalue	DIL_stat	DIL_Pvalue	DFI_stat	DFI_Pvalue	DOL_stat	DOL_Pvalue
I19067_14_seq2	I19065_12_seq2	I19064_11_seq1	I19060_6_seq1	877	914	848	1004	none	0.105719	0.0111023	0.067591	0.104463	0.072407	0.101676	0.0293542	0.506971
I19067_14_seq2	I19065_12_seq2	I19064_11_seq1	I19060_6_seq2	878	897	880	977	none	0.0309598	0.431347	-0.0588235	0.134891	0.11412	0.00946413	0.00193424	0.96492
I19067_14_seq2	I19065_12_seq2	I19064_11_seq1	I19061_7_seq1	877	904	851	1158	none	0.0851064	0.0290279	-0.0121581	0.755137	0.0926276	0.0331357	-0.0283554	0.514289
I19067_14_seq2	I19065_12_seq2	I19064_11_seq1	I19061_7_seq2	869	902	892	1104	none	0.131619	0.00071462	0.0529501	0.173406	0.0683919	0.111665	-0.0277264	0.518992
I19067_14_seq2	I19065_12_seq2	I19064_11_seq1	I19062_8_seq1	881	891	853	1089	none	0.0672515	0.0786023	-0.00877193	0.818546	0.0577617	0.173972	-0.0361011	0.395482
I19067_14_seq2	I19065_12_seq2	I19064_11_seq1	I19062_8_seq2	871	909	855	1051	none	0.0290323	0.469743	0.0387097	0.335115	0.014652	0.732074	0.025641	0.549076
I19067_14_seq2	I19065_12_seq2	I19064_11_seq2	I19060_6_seq1	856	869	832	1053	none	0.0949555	0.0136941	0.183976	1.78549e-06	-0.0590278	0.15658	0.0451389	0.27866
I19067_14_seq2	I19065_12_seq2	I19064_11_seq2	I19060_6_seq2	871	869	815	980	none	0.0352941	0.389284	0.0823529	0.0445579	-0.030853	0.468928	0.0199637	0.639344
I19067_14_seq2	I19065_12_seq2	I19064_11_seq2	I19061_7_seq1	871	876	833	1201	none	0.0926829	0.0215355	0.118699	0.00324373	-0.0355872	0.398866	-0.00711744	0.866009
I19067_14_seq2	I19065_12_seq2	I19064_11_seq2	I19061_7_seq2	863	875	839	1117	123	0.132743	0.000547383	0.168142	1.19694e-05	-0.04363	0.296305	-0.0017452	0.966678
I19067_14_seq2	I19065_12_seq2	I19064_11_seq2	I19062_8_seq1	878	870	828	1128	none	0.0788644	0.0470607	0.129338	0.00112741	-0.0708117	0.0883994	-0.015544	0.708384
I19067_14_seq2	I19065_12_seq2	I19064_11_seq2	I19062_8_seq2	869	879	818	1070	none	0.0260337	0.505883	0.169985	1.40061e-05	-0.0981067	0.0180418	0.0636833	0.124779
I19067_14_seq2	I19066_13_seq1	I19057_3_seq1	I19057_3_seq2	BAAAA	ABAAA	AABAA	AAABA	introgression	DFO_stat	DFO_Pvalue	DIL_stat	DIL_Pvalue	DFI_stat	DFI_Pvalue	DOL_stat	DOL_Pvalue
I19067_14_seq2	I19066_13_seq1	I19064_11_seq1	I19060_6_seq1	898	796	790	983	none	0.0284006	0.462594	0.100149	0.00958729	0.00487805	0.903713	0.0829268	0.0397326
I19067_14_seq2	I19066_13_seq1	I19064_11_seq1	I19060_6_seq2	863	806	830	979	none	-0.0449927	0.2376	0.0856313	0.024594	-0.0551181	0.164853	0.0866142	0.0290647
I19067_14_seq2	I19066_13_seq1	I19064_11_seq1	I19061_7_seq1	872	785	810	1138	none	0.0418994	0.262223	0.0726257	0.0519761	0	1	0.0344828	0.383761
I19067_14_seq2	I19066_13_seq1	I19064_11_seq1	I19061_7_seq2	885	784	840	1090	none	0.0635359	0.0873442	0.10221	0.0059561	0	1	0.0450161	0.261566
I19067_14_seq2	I19066_13_seq1	I19064_11_seq1	I19062_8_seq1	875	787	803	1070	none	0.0297297	0.418667	0.0864865	0.0186383	-0.0416667	0.280087	0.0208333	0.589154
I19067_14_seq2	I19066_13_seq1	I19064_11_seq1	I19062_8_seq2	892	820	821	1045	none	-0.025	0.527089	0.09375	0.0177061	-0.0786517	0.0496295	0.0433387	0.279372
I19067_14_seq2	I19066_13_seq1	I19064_11_seq2	I19060_6_seq1	859	821	815	1026	none	0.110787	0.00371152	0.0408163	0.285049	0.0486656	0.219348	-0.0266876	0.500588
I19067_14_seq2	I19066_13_seq1	I19064_11_seq2	I19060_6_seq2	865	825	795	965	none	0.0390879	0.332764	0.0390879	0.332764	0.0610932	0.127593	0.0610932	0.127593
I19067_14_seq2	I19066_13_seq1	I19064_11_seq2	I19061_7_seq1	869	802	809	1161	none	0.109375	0.0056576	0.04375	0.268382	0.0725552	0.0677158	0.00630915	0.873779
I19067_14_seq2	I19066_13_seq1	I19064_11_seq2	I19061_7_seq2	859	802	806	1084	none	0.127479	0.000706113	0.0708215	0.0598666	0.0391236	0.322671	-0.0234742	0.55292
I19067_14_seq2	I19066_13_seq1	I19064_11_seq2	I19062_8_seq1	871	811	802	1079	none	0.119155	0.0021542	0.0467572	0.228613	0.0497738	0.199978	-0.0226244	0.560195
I19067_14_seq2	I19066_13_seq1	I19064_11_seq2	I19062_8_seq2	862	826	800	1025	none	0.0586466	0.130444	0.0345865	0.372446	0.0136571	0.725896	-0.0106222	0.785098
I19067_14_seq2	I19066_13_seq2	I19057_3_seq1	I19057_3_seq2	BAAAA	ABAAA	AABAA	AAABA	introgression	DFO_stat	DFO_Pvalue	DIL_stat	DIL_Pvalue	DFI_stat	DFI_Pvalue	DOL_stat	DOL_Pvalue
I19067_14_seq2	I19066_13_seq2	I19064_11_seq1	I19060_6_seq1	869	909	839	990	none	0.0921053	0.0231409	0.0592105	0.144292	0.0585938	0.184898	0.0195312	0.658531
I19067_14_seq2	I19066_13_seq2	I19064_11_seq1	I19060_6_seq2	840	894	873	968	none	0.0200308	0.609845	0.0107858	0.78349	0.0128913	0.763873	0.00184162	0.96577
I19067_14_seq2	I19066_13_seq2	I19064_11_seq1	I19061_7_seq1	843	887	844	1139	none	0.0810015	0.0347976	0.0132548	0.729802	0.0323741	0.445243	-0.0503597	0.235044
I19067_14_seq2	I19066_13_seq2	I19064_11_seq1	I19061_7_seq2	857	897	876	1094	none	0.0992593	0.00991352	0.0637037	0.0979101	0.0299625	0.488694	-0.0149813	0.729197
I19067_14_seq2	I19066_13_seq2	I19064_11_seq1	I19062_8_seq1	851	897	848	1077	none	0.0773723	0.0428647	0.0218978	0.566563	0.026643	0.527273	-0.0408526	0.332378
I19067_14_seq2	I19066_13_seq2	I19064_11_seq1	I19062_8_seq2	869	912	856	1028	none	0.0390879	0.332764	0.00325733	0.93567	0.0187266	0.665202	-0.0224719	0.603558
I19067_14_seq2	I19066_13_seq2	I19064_11_seq2	I19060_6_seq1	850	873	803	1037	none	0.0782609	0.0398071	0.185507	1.09985e-06	-0.0868056	0.0372209	0.0416667	0.317311
I19067_14_seq2	I19066_13_seq2	I19064_11_seq2	I19060_6_seq2	858	862	786	966	none	0.0177706	0.658397	0.156704	9.66869e-05	-0.0654867	0.119565	0.0867257	0.0392606
I19067_14_seq2	I19066_13_seq2	I19064_11_seq2	I19061_7_seq1	869	862	801	1171	none	0.0795632	0.0439698	0.157566	6.62797e-05	-0.0477876	0.255999	0.040708	0.333236
I19067_14_seq2	I19066_13_seq2	I19064_11_seq2	I19061_7_seq2	855	877	805	1101	none	0.0975255	0.0105819	0.193595	3.88994e-07	-0.0976909	0.0204508	0.0195382	0.642938
I19067_14_seq2	I19066_13_seq2	I19064_11_seq2	I19062_8_seq1	874	878	804	1107	none	0.081761	0.039214	0.169811	1.84823e-05	-0.0666667	0.111465	0.0315789	0.450887
I19067_14_seq2	I19066_13_seq2	I19064_11_seq2	I19062_8_seq2	858	881	798	1036	none	0.0306748	0.433474	0.141104	0.000314568	-0.104274	0.0116677	0.0188034	0.649257
I19068_16_seq1	I19065_12_seq1	I19057_3_seq1	I19057_3_seq2	BAAAA	ABAAA	AABAA	AAABA	introgression	DFO_stat	DFO_Pvalue	DIL_stat	DIL_Pvalue	DFI_stat	DFI_Pvalue	DOL_stat	DOL_Pvalue
I19068_16_seq1	I19065_12_seq1	I19064_11_seq1	I19060_6_seq1	918	856	760	943	none	0.0576271	0.161586	0.122034	0.00303478	0.00900901	0.831921	0.0774775	0.0679636
I19068_16_seq1	I19065_12_seq1	I19064_11_seq1	I19060_6_seq2	922	847	791	966	none	0.0614887	0.126368	0.0161812	0.687493	0.0425532	0.312216	-0.0070922	0.866245
I19068_16_seq1	I19065_12_seq1	I19064_11_seq1	I19061_7_seq1	900	842	766	1123	none	0.0629139	0.122057	0.0695364	0.0874591	0.0465549	0.280664	0.0540037	0.210773
I19068_16_seq1	I19065_12_seq1	I19064_11_seq1	I19061_7_seq2	897	844	786	1065	none	0.121118	0.00211471	0.052795	0.180314	0.0441176	0.303484	-0.0367647	0.391173
I19068_16_seq1	I19065_12_seq1	I19064_11_seq1	I19062_8_seq1	901	870	766	1072	none	0.0407524	0.303315	0.141066	0.000366453	-0.005386	0.89885	0.109515	0.00974771
I19068_16_seq1	I19065_12_seq1	I19064_11_seq1	I19062_8_seq2	908	865	783	997	none	0.0327022	0.430549	0.091222	0.0278914	0.0198198	0.640554	0.0810811	0.0561147
I19068_16_seq1	I19065_12_seq1	I19064_11_seq2	I19060_6_seq1	904	853	823	977	none	0.0160772	0.688447	0.135048	0.0007569	-0.0484429	0.244162	0.0795848	0.0557035
I19068_16_seq1	I19065_12_seq1	I19064_11_seq2	I19060_6_seq2	925	846	771	917	none	0.0262697	0.530181	0.0367776	0.379497	-0.00716846	0.865534	0.00358423	0.932526
I19068_16_seq1	I19065_12_seq1	I19064_11_seq2	I19061_7_seq1	884	849	771	1114	none	0.0430464	0.29009	0.0960265	0.0182756	-0.0198915	0.639951	0.0379747	0.371851
I19068_16_seq1	I19065_12_seq1	I19064_11_seq2	I19061_7_seq2	895	847	800	1067	none	0.107143	0.00783228	0.0844156	0.0361586	0.00182149	0.965957	-0.0236794	0.579013
I19068_16_seq1	I19065_12_seq1	I19064_11_seq2	I19062_8_seq1	885	863	770	1058	none	-0.00784929	0.842961	0.161695	4.48407e-05	-0.0732538	0.0759309	0.110733	0.00730005
I19068_16_seq1	I19065_12_seq1	I19064_11_seq2	I19062_8_seq2	903	864	816	1005	none	-0.0248227	0.555522	0.120567	0.00419232	-0.047619	0.256839	0.0970018	0.0209002
I19068_16_seq1	I19065_12_seq2	I19057_3_seq1	I19057_3_seq2	BAAAA	ABAAA	AABAA	AAABA	introgression	DFO_stat	DFO_Pvalue	DIL_stat	DIL_Pvalue	DFI_stat	DFI_Pvalue	DOL_stat	DOL_Pvalue
I19068_16_seq1	I19065_12_seq2	I19064_11_seq1	I19060_6_seq1	925	921	743	928	none	0.0516129	0.19874	0.00322581	0.935981	0.0387097	0.335115	-0.00967742	0.809582
I19068_16_seq1	I19065_12_seq2	I19064_11_seq1	I19060_6_seq2	931	867	775	908	none	0.115328	0.00254084	-0.109489	0.00416216	0.127436	0.000997563	-0.103448	0.00754702
I19068_16_seq1	I19065_12_seq2	I19064_11_seq1	I19061_7_seq1	916	870	752	1082	none	0.110778	0.00419457	-0.0778443	0.0442262	0.11746	0.00319599	-0.0825397	0.0382907
I19068_16_seq1	I19065_12_seq2	I19064_11_seq1	I19061_7_seq2	917	899	781	1043	none	0.134731	0.000497304	-0.0299401	0.439035	0.0733333	0.072448	-0.11	0.00705073
I19068_16_seq1	I19065_12_seq2	I19064_11_seq1	I19062_8_seq1	918	873	754	1016	none	0.0968661	0.0102732	-0.045584	0.227139	0.0769231	0.0476276	-0.0739065	0.0570402
I19068_16_seq1	I19065_12_seq2	I19064_11_seq1	I19062_8_seq2	925	908	767	981	none	0.0313015	0.440597	-0.0181219	0.655253	0.0418006	0.297178	-0.00643087	0.872577
I19068_16_seq1	I19065_12_seq2	I19064_11_seq2	I19060_6_seq1	928	864	765	968	none	-0.0567686	0.136766	0.167394	1.14649e-05	-0.14963	0.000101285	0.0785185	0.0413532
I19068_16_seq1	I19065_12_seq2	I19064_11_seq2	I19060_6_seq2	946	858	749	902	none	0.0116086	0.775597	0.0646766	0.11224	-0.115152	0.00309345	-0.0666667	0.0867682
I19068_16_seq1	I19065_12_seq2	I19064_11_seq2	I19061_7_seq1	917	864	757	1115	none	0.0320513	0.42334	0.0705128	0.0781691	-0.113208	0.00430388	-0.0754717	0.0569983
I19068_16_seq1	I19065_12_seq2	I19064_11_seq2	I19061_7_seq2	929	855	760	1053	none	0.052161	0.176644	0.108793	0.00483037	-0.0805687	0.0426555	-0.0205371	0.605363
I19068_16_seq1	I19065_12_seq2	I19064_11_seq2	I19062_8_seq1	927	855	758	1042	none	-0.00453858	0.907109	0.113464	0.00353232	-0.151335	8.53377e-05	-0.0356083	0.355254
I19068_16_seq1	I19065_12_seq2	I19064_11_seq2	I19062_8_seq2	935	853	757	987	none	-0.0846395	0.0325264	0.147335	0.000198046	-0.131737	0.000662071	0.0898204	0.0202615
I19068_16_seq1	I19066_13_seq1	I19057_3_seq1	I19057_3_seq2	BAAAA	ABAAA	AABAA	AAABA	introgression	DFO_stat	DFO_Pvalue	DIL_stat	DIL_Pvalue	DFI_stat	DFI_Pvalue	DOL_stat	DOL_Pvalue
I19068_16_seq1	I19066_13_seq1	I19064_11_seq1	I19060_6_seq1	913	764	736	917	none	0.0296412	0.452981	0.0920437	0.0197871	-0.0157068	0.706931	0.0541012	0.195305
I19068_16_seq1	I19066_13_seq1	I19064_11_seq1	I19060_6_seq2	906	753	770	939	none	0.0496894	0.207317	0.0310559	0.430632	-0.00677966	0.869198	-0.0271186	0.510082
I19068_16_seq1	I19066_13_seq1	I19064_11_seq1	I19061_7_seq1	901	741	753	1081	none	0.07739	0.0469581	0.0257967	0.507826	0.0405405	0.32394	-0.0168919	0.681074
I19068_16_seq1	I19066_13_seq1	I19064_11_seq1	I19061_7_seq2	894	740	772	1013	none	0.128799	0.000709919	0.0738061	0.0523637	0.0135135	0.742308	-0.0506757	0.217579
I19068_16_seq1	I19066_13_seq1	I19064_11_seq1	I19062_8_seq1	893	749	758	1028	none	0.0630631	0.103638	0.0600601	0.121149	-0.0169492	0.680564	-0.020339	0.621283
I19068_16_seq1	I19066_13_seq1	I19064_11_seq1	I19062_8_seq2	896	773	770	974	none	-0.0017094	0.967021	0.0632479	0.126076	-0.0565371	0.178606	0.0106007	0.800887
I19068_16_seq1	I19066_13_seq1	I19064_11_seq2	I19060_6_seq1	897	762	793	955	none	0.00472441	0.905235	0.108661	0.006178	-0.0758853	0.0646127	0.0354132	0.388486
I19068_16_seq1	I19066_13_seq1	I19064_11_seq2	I19060_6_seq2	906	758	741	895	none	0.0321489	0.434476	0.0490694	0.232908	-0.047619	0.248213	-0.0306122	0.457901
I19068_16_seq1	I19066_13_seq1	I19064_11_seq2	I19061_7_seq1	888	751	752	1076	none	0.0779014	0.0507298	0.0492846	0.21644	-0.02	0.624206	-0.05	0.220671
I19068_16_seq1	I19066_13_seq1	I19064_11_seq2	I19061_7_seq2	896	738	775	1014	none	0.135802	0.000546293	0.095679	0.0148675	0	1	-0.0436242	0.286875
I19068_16_seq1	I19066_13_seq1	I19064_11_seq2	I19062_8_seq1	878	744	761	1012	none	0.0482115	0.221511	0.066874	0.0899324	-0.0553746	0.170023	-0.0358306	0.374623
I19068_16_seq1	I19066_13_seq1	I19064_11_seq2	I19062_8_seq2	898	762	790	967	none	-0.020979	0.615847	0.0629371	0.132264	-0.0482759	0.244977	0.0344828	0.406282
I19068_16_seq1	I19066_13_seq2	I19057_3_seq1	I19057_3_seq2	BAAAA	ABAAA	AABAA	AAABA	introgression	DFO_stat	DFO_Pvalue	DIL_stat	DIL_Pvalue	DFI_stat	DFI_Pvalue	DOL_stat	DOL_Pvalue
I19068_16_seq1	I19066_13_seq2	I19064_11_seq1	I19060_6_seq1	904	887	749	917	none	0.0531401	0.185422	0.0177134	0.658913	0.0196078	0.642347	-0.0196078	0.642347
I19068_16_seq1	I19066_13_seq2	I19064_11_seq1	I19060_6_seq2	907	862	779	935	none	0.0681458	0.086933	-0.0776545	0.0510976	0.0457746	0.275301	-0.116197	0.00561771
I19068_16_seq1	I19066_13_seq2	I19064_11_seq1	I19061_7_seq1	896	863	770	1086	none	0.10443	0.00865627	-0.0411392	0.301031	0.0623886	0.139488	-0.101604	0.0161044
I19068_16_seq1	I19066_13_seq2	I19064_11_seq1	I19061_7_seq2	898	881	783	1028	none	0.130168	0.000880049	0.00153139	0.968784	0.0333333	0.438578	-0.122222	0.0045087
I19068_16_seq1	I19066_13_seq2	I19064_11_seq1	I19062_8_seq1	894	885	764	1037	none	0.0666667	0.090432	-0.0449612	0.253506	0.0428571	0.310494	-0.0857143	0.0425225
I19068_16_seq1	I19066_13_seq2	I19064_11_seq1	I19062_8_seq2	902	893	779	960	none	0.0311419	0.454037	-0.0553633	0.183181	0.0309654	0.468119	-0.0601093	0.159011
I19068_16_seq1	I19066_13_seq2	I19064_11_seq2	I19060_6_seq1	922	848	773	957	none	-0.0321593	0.411194	0.222052	1.39266e-08	-0.202749	1.00194e-06	0.0824742	0.046628
I19068_16_seq1	I19066_13_seq2	I19064_11_seq2	I19060_6_seq2	941	842	730	903	none	-0.0101351	0.805219	0.138514	0.000751193	-0.177536	3.03057e-05	-0.0181159	0.670379
I19068_16_seq1	I19066_13_seq2	I19064_11_seq2	I19061_7_seq1	911	840	741	1085	none	0.0443038	0.265373	0.142405	0.000343584	-0.140351	0.000805694	-0.0315789	0.450887
I19068_16_seq1	I19066_13_seq2	I19064_11_seq2	I19061_7_seq2	924	851	764	1038	none	0.0759494	0.0562186	0.18038	5.76918e-06	-0.141284	0.00097266	-0.0201835	0.637506
I19068_16_seq1	I19066_13_seq2	I19064_11_seq2	I19062_8_seq1	921	860	752	1038	none	-0.00955414	0.810775	0.159236	6.59524e-05	-0.183601	1.3697e-05	0.00534759	0.899209
I19068_16_seq1	I19066_13_seq2	I19064_11_seq2	I19062_8_seq2	931	861	783	971	none	-0.0579965	0.166532	0.163445	9.66854e-05	-0.175407	3.70961e-05	0.0524412	0.217499
I19068_16_seq1	I19067_14_seq1	I19057_3_seq1	I19057_3_seq2	BAAAA	ABAAA	AABAA	AAABA	introgression	DFO_stat	DFO_Pvalue	DIL_stat	DIL_Pvalue	DFI_stat	DFI_Pvalue	DOL_stat	DOL_Pvalue
I19068_16_seq1	I19067_14_seq1	I19064_11_seq1	I19060_6_seq1	896	772	767	933	none	0.0550162	0.171412	0.0453074	0.260028	-0.0457038	0.285104	-0.0566728	0.185017
I19068_16_seq1	I19067_14_seq1	I19064_11_seq1	I19060_6_seq2	887	763	786	962	none	0.0393701	0.321151	0.023622	0.551672	-0.0481283	0.254311	-0.0659537	0.118255
I19068_16_seq1	I19067_14_seq1	I19064_11_seq1	I19061_7_seq1	891	758	764	1124	none	0.0519685	0.190343	0.080315	0.0429832	-0.0532319	0.22214	-0.0190114	0.662822
I19068_16_seq1	I19067_14_seq1	I19064_11_seq1	I19061_7_seq2	883	770	780	1063	none	0.0903614	0.0198881	0.135542	0.000478204	-0.0846154	0.0536654	-0.0269231	0.539255
I19068_16_seq1	I19067_14_seq1	I19064_11_seq1	I19062_8_seq1	877	767	773	1038	none	0.0628743	0.104156	0.0748503	0.0530445	-0.0491228	0.24088	-0.0350877	0.402195
I19068_16_seq1	I19067_14_seq1	I19064_11_seq1	I19062_8_seq2	893	773	788	977	none	0.0313015	0.440597	0.014827	0.714888	-0.0307414	0.469733	-0.0488246	0.250904
I19068_16_seq1	I19067_14_seq1	I19064_11_seq2	I19060_6_seq1	887	782	842	958	none	0.0537975	0.176232	0.0253165	0.524486	-0.0414414	0.328918	-0.0738739	0.081797
I19068_16_seq1	I19067_14_seq1	I19064_11_seq2	I19060_6_seq2	897	786	785	911	none	0.0510204	0.216021	0.00340136	0.934266	-0.027933	0.517439	-0.0800745	0.0635125
I19068_16_seq1	I19067_14_seq1	I19064_11_seq2	I19061_7_seq1	871	776	776	1103	none	0.07109	0.073681	0.0394945	0.320388	-0.0351201	0.414001	-0.0720887	0.0935931
I19068_16_seq1	I19067_14_seq1	I19064_11_seq2	I19061_7_seq2	879	782	801	1053	123	0.10935	0.00601713	0.106181	0.00764798	-0.0441459	0.313623	-0.0479846	0.273398
I19068_16_seq1	I19067_14_seq1	I19064_11_seq2	I19062_8_seq1	880	778	794	1015	none	0.0633694	0.106989	0.0633694	0.106989	-0.0385965	0.356801	-0.0385965	0.356801
I19068_16_seq1	I19067_14_seq1	I19064_11_seq2	I19062_8_seq2	894	781	829	965	none	0.0272109	0.509364	0	1	-0.0198915	0.639951	-0.0488246	0.250904
I19068_16_seq1	I19067_14_seq2	I19057_3_seq1	I19057_3_seq2	BAAAA	ABAAA	AABAA	AAABA	introgression	DFO_stat	DFO_Pvalue	DIL_stat	DIL_Pvalue	DFI_stat	DFI_Pvalue	DOL_stat	DOL_Pvalue
I19068_16_seq1	I19067_14_seq2	I19064_11_seq1	I19060_6_seq1	878	836	760	928	none	0.0528	0.186835	0.0336	0.400908	-0.0188034	0.649257	-0.0393162	0.341638
I19068_16_seq1	I19067_14_seq2	I19064_11_seq1	I19060_6_seq2	882	798	782	927	none	0.076006	0.0489723	-0.0432191	0.262913	0.040783	0.31262	-0.0897227	0.0263219
I19068_16_seq1	I19067_14_seq2	I19064_11_seq1	I19061_7_seq1	862	792	766	1089	none	0.102832	0.00772829	-0.00149031	0.969206	0.0485762	0.235271	-0.0686767	0.0933435
I19068_16_seq1	I19067_14_seq2	I19064_11_seq1	I19061_7_seq2	864	815	786	1040	none	0.132075	0.000526647	0.0275762	0.469163	0.0208333	0.617075	-0.104167	0.0124193
I19068_16_seq1	I19067_14_seq2	I19064_11_seq1	I19062_8_seq1	864	809	767	1013	none	0.0893617	0.0176578	0.012766	0.73464	0.0332805	0.403157	-0.0522979	0.188944
I19068_16_seq1	I19067_14_seq2	I19064_11_seq1	I19062_8_seq2	881	836	782	976	none	0.0257235	0.521171	0	1	0.0170068	0.680051	-0.0102041	0.804571
I19068_16_seq1	I19067_14_seq2	I19064_11_seq2	I19060_6_seq1	891	801	791	957	none	-0.0233236	0.541277	0.148688	9.8451e-05	-0.134087	0.000849774	0.0565428	0.159496
I19068_16_seq1	I19067_14_seq2	I19064_11_seq2	I19060_6_seq2	902	807	765	911	none	0.00993377	0.807125	0.0827815	0.0419041	-0.136594	0.000880162	-0.0623946	0.12866
I19068_16_seq1	I19067_14_seq2	I19064_11_seq2	I19061_7_seq1	861	795	765	1099	none	0.0539291	0.169482	0.0970724	0.0133997	-0.110379	0.00653913	-0.0642504	0.11343
I19068_16_seq1	I19067_14_seq2	I19064_11_seq2	I19061_7_seq2	882	787	767	1036	none	0.0811594	0.0330164	0.121739	0.00138468	-0.0655462	0.109855	-0.0184874	0.652021
I19068_16_seq1	I19067_14_seq2	I19064_11_seq2	I19062_8_seq1	876	799	769	1019	none	0.0207715	0.589708	0.127596	0.000924343	-0.125	0.0015654	-0.0125	0.75183
I19068_16_seq1	I19067_14_seq2	I19064_11_seq2	I19062_8_seq2	895	799	778	967	none	-0.053125	0.178959	0.115625	0.00344338	-0.098546	0.0142145	0.0759289	0.0588798
I19068_16_seq2	I19065_12_seq1	I19057_3_seq1	I19057_3_seq2	BAAAA	ABAAA	AABAA	AAABA	introgression	DFO_stat	DFO_Pvalue	DIL_stat	DIL_Pvalue	DFI_stat	DFI_Pvalue	DOL_stat	DOL_Pvalue
I19068_16_seq2	I19065_12_seq1	I19064_11_seq1	I19060_6_seq1	894	883	756	925	none	0.0243112	0.545925	0.153971	0.000131008	-0.0352113	0.401368	0.105634	0.0118176
I19068_16_seq2	I19065_12_seq1	I19064_11_seq1	I19060_6_seq2	888	878	806	937	none	-0.0636943	0.11045	0.0859873	0.0311748	-0.0104167	0.802587	0.152778	0.000245733
I19068_16_seq2	I19065_12_seq1	I19064_11_seq1	I19061_7_seq1	869	870	772	1086	none	-0.00157978	0.968295	0.1406	0.000404038	-0.00722022	0.865054	0.155235	0.000258398
I19068_16_seq2	I19065_12_seq1	I19064_11_seq1	I19061_7_seq2	870	873	805	1043	none	0.00460829	0.906401	0.124424	0.00150022	0	1	0.141818	0.000881237
I19068_16_seq2	I19065_12_seq1	I19064_11_seq1	I19062_8_seq1	872	895	774	1058	none	-0.0451011	0.252769	0.175739	8.33922e-06	-0.0397112	0.349948	0.216606	3.42697e-07
I19068_16_seq2	I19065_12_seq1	I19064_11_seq1	I19062_8_seq2	885	895	790	983	none	-0.0415225	0.318149	0.117647	0.00467773	-0.0147059	0.731601	0.154412	0.000316423
I19068_16_seq2	I19065_12_seq1	I19064_11_seq2	I19060_6_seq1	872	883	816	973	none	0.0900621	0.0222823	0.118012	0.00274607	0.05	0.220671	0.08	0.0500435
I19068_16_seq2	I19065_12_seq1	I19064_11_seq2	I19060_6_seq2	873	886	772	893	none	0.00502513	0.90228	0.0586265	0.152014	0.0566038	0.171713	0.111492	0.00710196
I19068_16_seq2	I19065_12_seq1	I19064_11_seq2	I19061_7_seq1	849	877	781	1096	none	0.0601626	0.135703	0.118699	0.00324373	0.0622837	0.134289	0.124567	0.0027462
I19068_16_seq2	I19065_12_seq1	I19064_11_seq2	I19061_7_seq2	852	882	813	1053	none	0.0571429	0.151494	0.111111	0.00528928	0.0561404	0.180137	0.115789	0.00570213
I19068_16_seq2	I19065_12_seq1	I19064_11_seq2	I19062_8_seq1	855	909	779	1064	none	0.0194805	0.628745	0.155844	0.000109754	0.0369069	0.378661	0.184534	1.07342e-05
I19068_16_seq2	I19065_12_seq1	I19064_11_seq2	I19062_8_seq2	856	905	803	990	none	0.0254669	0.536533	0.089983	0.028975	0.0383275	0.358482	0.10453	0.0122676
I19068_16_seq2	I19065_12_seq2	I19057_3_seq1	I19057_3_seq2	BAAAA	ABAAA	AABAA	AAABA	introgression	DFO_stat	DFO_Pvalue	DIL_stat	DIL_Pvalue	DFI_stat	DFI_Pvalue	DOL_stat	DOL_Pvalue
I19068_16_seq2	I19065_12_seq2	I19064_11_seq1	I19060_6_seq1	874	905	770	925	none	0.0512397	0.207551	0.0578512	0.15475	0.0187266	0.665202	0.0262172	0.544622
I19068_16_seq2	I19065_12_seq2	I19064_11_seq1	I19060_6_seq2	877	863	825	902	none	0.0234009	0.55354	-0.0358814	0.363643	0.115453	0.00615471	0.0479574	0.255156
I19068_16_seq2	I19065_12_seq2	I19064_11_seq1	I19061_7_seq1	862	860	783	1075	none	0.058642	0.135495	-0.0308642	0.432058	0.105751	0.014082	-0.00185529	0.965643
I19068_16_seq2	I19065_12_seq2	I19064_11_seq1	I19061_7_seq2	853	877	822	1038	none	0.05919	0.133682	0.0436137	0.269128	0.0588235	0.176894	0.0398482	0.36031
I19068_16_seq2	I19065_12_seq2	I19064_11_seq1	I19062_8_seq1	858	849	797	1012	none	0.0630631	0.103638	0.00600601	0.876824	0.0809859	0.0535923	0.0140845	0.737118
I19068_16_seq2	I19065_12_seq2	I19064_11_seq1	I19062_8_seq2	864	884	804	972	none	0.010453	0.802251	0.0418118	0.316469	0.0357815	0.409639	0.0696798	0.108348
I19068_16_seq2	I19065_12_seq2	I19064_11_seq2	I19060_6_seq1	867	847	783	984	none	0.024024	0.535266	0.177177	4.82153e-06	-0.0684474	0.0938921	0.101836	0.0126886
I19068_16_seq2	I19065_12_seq2	I19064_11_seq2	I19060_6_seq2	863	849	770	897	none	-0.00337838	0.934488	0.10473	0.0108285	-0.0626058	0.128015	0.0456853	0.266727
I19068_16_seq2	I19065_12_seq2	I19064_11_seq2	I19061_7_seq1	852	845	783	1118	none	0.0564784	0.165827	0.0930233	0.0224663	-0.0390071	0.354255	0	1
I19068_16_seq2	I19065_12_seq2	I19064_11_seq2	I19061_7_seq2	849	835	793	1054	none	0.0442748	0.257162	0.160305	4.08375e-05	-0.026087	0.531615	0.106087	0.010963
I19068_16_seq2	I19065_12_seq2	I19064_11_seq2	I19062_8_seq1	846	831	781	1050	none	0.0494418	0.215708	0.129187	0.00121716	-0.0550918	0.177548	0.0283806	0.487305
I19068_16_seq2	I19065_12_seq2	I19064_11_seq2	I19062_8_seq2	850	837	772	988	none	-0.011236	0.779133	0.158909	7.29813e-05	-0.0572391	0.163005	0.121212	0.00313485
I19068_16_seq2	I19066_13_seq1	I19057_3_seq1	I19057_3_seq2	BAAAA	ABAAA	AABAA	AAABA	introgression	DFO_stat	DFO_Pvalue	DIL_stat	DIL_Pvalue	DFI_stat	DFI_Pvalue	DOL_stat	DOL_Pvalue
I19068_16_seq2	I19066_13_seq1	I19064_11_seq1	I19060_6_seq1	876	765	751	918	none	0.0205371	0.605363	0.124803	0.00168966	-0.0366089	0.404277	0.0905588	0.0391059
I19068_16_seq2	I19066_13_seq1	I19064_11_seq1	I19060_6_seq2	863	768	798	934	none	-0.0821256	0.0407014	0.0885668	0.0273089	-0.0514286	0.238646	0.150476	0.000565083
I19068_16_seq2	I19066_13_seq1	I19064_11_seq1	I19061_7_seq1	862	747	775	1073	none	0.0308642	0.432058	0.0740741	0.0593464	0.0210325	0.630519	0.0745698	0.088129
I19068_16_seq2	I19066_13_seq1	I19064_11_seq1	I19061_7_seq2	860	749	802	1021	none	0.0377074	0.331588	0.122172	0.00165645	0.00194175	0.964852	0.11068	0.0120144
I19068_16_seq2	I19066_13_seq1	I19064_11_seq1	I19062_8_seq1	857	751	773	1033	none	0.00770416	0.844401	0.0785824	0.0452928	-0.0170132	0.695572	0.0699433	0.107683
I19068_16_seq2	I19066_13_seq1	I19064_11_seq1	I19062_8_seq2	867	778	794	975	none	-0.0414414	0.328918	0.102703	0.0155412	-0.068	0.128379	0.092	0.0396687
I19068_16_seq2	I19066_13_seq1	I19064_11_seq2	I19060_6_seq1	854	762	803	963	none	0.0734824	0.0659844	0.105431	0.00834235	0.012844	0.764294	0.0495413	0.247455
I19068_16_seq2	I19066_13_seq1	I19064_11_seq2	I19060_6_seq2	853	776	759	893	none	-0.0294627	0.47912	0.0710572	0.0878495	0.00567108	0.896222	0.115312	0.00799753
I19068_16_seq2	I19066_13_seq1	I19064_11_seq2	I19061_7_seq1	844	748	775	1079	none	0.0792079	0.051192	0.0660066	0.104186	0.053407	0.213312	0.038674	0.367484
I19068_16_seq2	I19066_13_seq1	I19064_11_seq2	I19061_7_seq2	844	743	795	1022	none	0.0754717	0.0569983	0.113208	0.00430388	0.0463822	0.281558	0.0909091	0.0348085
I19068_16_seq2	I19066_13_seq1	I19064_11_seq2	I19062_8_seq1	841	757	775	1030	none	0.0710744	0.0804296	0.0512397	0.207551	0.0536044	0.212468	0.0314233	0.464848
I19068_16_seq2	I19066_13_seq1	I19064_11_seq2	I19062_8_seq2	848	773	795	965	none	0.024735	0.556221	0.0530035	0.207311	0.0322581	0.458977	0.0626186	0.150575
I19068_16_seq2	I19066_13_seq2	I19057_3_seq1	I19057_3_seq2	BAAAA	ABAAA	AABAA	AAABA	introgression	DFO_stat	DFO_Pvalue	DIL_stat	DIL_Pvalue	DFI_stat	DFI_Pvalue	DOL_stat	DOL_Pvalue
I19068_16_seq2	I19066_13_seq2	I19064_11_seq1	I19060_6_seq1	870	892	771	918	none	0.0613599	0.131873	0.0613599	0.131873	0.014862	0.747041	0.014862	0.747041
I19068_16_seq2	I19066_13_seq2	I19064_11_seq1	I19060_6_seq2	863	874	826	924	none	-0.0151771	0.711691	0.0118044	0.773764	0.0271399	0.552522	0.0605428	0.185157
I19068_16_seq2	I19066_13_seq2	I19064_11_seq1	I19061_7_seq1	859	870	791	1072	none	0.0702875	0.0786465	0.00958466	0.810479	0.0564516	0.208668	-0.0201613	0.653422
I19068_16_seq2	I19066_13_seq2	I19064_11_seq1	I19061_7_seq2	859	885	819	1024	none	0.0698413	0.0796017	0.0761905	0.0558293	0.033195	0.466136	0.0414938	0.362309
I19068_16_seq2	I19066_13_seq2	I19064_11_seq1	I19062_8_seq1	856	877	800	1034	none	0.0603589	0.135067	0.00815661	0.839957	0.0672269	0.142453	0	1
I19068_16_seq2	I19066_13_seq2	I19064_11_seq1	I19062_8_seq2	873	894	810	961	none	0.0148148	0.730647	-0.0148148	0.730647	0.0512249	0.277728	0.0155902	0.741135
I19068_16_seq2	I19066_13_seq2	I19064_11_seq2	I19060_6_seq1	874	840	780	977	none	0.0141732	0.720976	0.225197	1.38865e-08	-0.135659	0.00205906	0.124031	0.00484077
I19068_16_seq2	I19066_13_seq2	I19064_11_seq2	I19060_6_seq2	866	834	745	895	none	-0.0562181	0.17318	0.189097	4.6174e-06	-0.138402	0.00172014	0.1423	0.00126843
I19068_16_seq2	I19066_13_seq2	I19064_11_seq2	I19061_7_seq1	864	829	756	1087	none	0.0371567	0.355253	0.166397	3.47428e-05	-0.0792453	0.0680971	0.0716981	0.0988173
I19068_16_seq2	I19066_13_seq2	I19064_11_seq2	I19061_7_seq2	858	838	779	1035	none	0.031348	0.428473	0.22884	7.46139e-09	-0.106061	0.0148061	0.132576	0.00231631
I19068_16_seq2	I19066_13_seq2	I19064_11_seq2	I19062_8_seq1	861	840	766	1049	none	0.0234899	0.566332	0.174497	2.04421e-05	-0.0848126	0.0561722	0.0927022	0.0368571
I19068_16_seq2	I19066_13_seq2	I19064_11_seq2	I19062_8_seq2	868	852	781	975	none	-0.0283688	0.500488	0.152482	0.000293179	-0.111111	0.0134335	0.0949495	0.0346442
I19068_16_seq2	I19067_14_seq1	I19057_3_seq1	I19057_3_seq2	BAAAA	ABAAA	AABAA	AAABA	introgression	DFO_stat	DFO_Pvalue	DIL_stat	DIL_Pvalue	DFI_stat	DFI_Pvalue	DOL_stat	DOL_Pvalue
I19068_16_seq2	I19067_14_seq1	I19064_11_seq1	I19060_6_seq1	882	782	771	923	none	0.0450161	0.261566	0.073955	0.0651202	-0.0700389	0.112311	-0.0350195	0.427227
I19068_16_seq2	I19067_14_seq1	I19064_11_seq1	I19060_6_seq2	859	775	806	942	none	-0.0634921	0.111017	0.0857143	0.0314437	-0.0881801	0.0417708	0.0881801	0.0417708
I19068_16_seq2	I19067_14_seq1	I19064_11_seq1	I19061_7_seq1	859	761	766	1097	none	-0.00303951	0.937853	0.130699	0.000800479	-0.0874525	0.0448888	0.0798479	0.0670577
I19068_16_seq2	I19067_14_seq1	I19064_11_seq1	I19061_7_seq2	858	777	795	1055	none	-0.0075643	0.845802	0.186082	1.71716e-06	-0.11332	0.0110377	0.141153	0.00154692
I19068_16_seq2	I19067_14_seq1	I19064_11_seq1	I19062_8_seq1	858	774	787	1030	none	0.0181818	0.640429	0.118182	0.00239623	-0.0671642	0.119955	0.0559701	0.195043
I19068_16_seq2	I19067_14_seq1	I19064_11_seq1	I19062_8_seq2	880	783	792	967	none	-0.0165563	0.684086	0.0331126	0.415766	-0.0444874	0.311759	0.0135397	0.758189
I19068_16_seq2	I19067_14_seq1	I19064_11_seq2	I19060_6_seq1	855	784	833	963	none	0.11875	0.00266312	-0.00625	0.874367	0.0695971	0.103897	-0.0769231	0.0722667
I19068_16_seq2	I19067_14_seq1	I19064_11_seq2	I19060_6_seq2	848	797	788	904	none	0.0219224	0.593448	0.00168634	0.967244	0.0566038	0.192535	0.0339623	0.434291
I19068_16_seq2	I19067_14_seq1	I19064_11_seq2	I19061_7_seq1	838	778	787	1099	none	0.0779014	0.0507298	0.0492846	0.21644	0.0536044	0.212468	0.0203327	0.636265
I19068_16_seq2	I19067_14_seq1	I19064_11_seq2	I19061_7_seq2	837	789	811	1052	none	0.0660377	0.0958313	0.113208	0.00430388	0.024952	0.56899	0.0825336	0.0595833
I19068_16_seq2	I19067_14_seq1	I19064_11_seq2	I19062_8_seq1	847	788	798	1026	none	0.099359	0.0130652	0.0448718	0.262332	0.0825688	0.0539064	0.0201835	0.637506
I19068_16_seq2	I19067_14_seq1	I19064_11_seq2	I19062_8_seq2	857	799	815	969	none	0.0621849	0.129304	-0.0521008	0.203773	0.0806754	0.0625275	-0.0469043	0.278866
I19068_16_seq2	I19067_14_seq2	I19057_3_seq1	I19057_3_seq2	BAAAA	ABAAA	AABAA	AAABA	introgression	DFO_stat	DFO_Pvalue	DIL_stat	DIL_Pvalue	DFI_stat	DFI_Pvalue	DOL_stat	DOL_Pvalue
I19068_16_seq2	I19067_14_seq2	I19064_11_seq1	I19060_6_seq1	839	818	780	938	none	0.04	0.327187	0.0766667	0.0603891	-0.0566802	0.207749	-0.0121457	0.787197
I19068_16_seq2	I19067_14_seq2	I19064_11_seq1	I19060_6_seq2	836	788	824	925	none	-0.0207337	0.603642	0.0334928	0.401661	0	1	0.0651341	0.136714
I19068_16_seq2	I19067_14_seq2	I19064_11_seq1	I19061_7_seq1	829	789	782	1090	none	0.0335366	0.390365	0.0426829	0.274299	0.0114068	0.79362	0.0228137	0.600818
I19068_16_seq2	I19067_14_seq2	I19064_11_seq1	I19061_7_seq2	825	804	815	1047	none	0.0408472	0.293636	0.0892587	0.0217426	-0.00970874	0.825617	0.0524272	0.23414
I19068_16_seq2	I19067_14_seq2	I19064_11_seq1	I19062_8_seq1	830	794	795	1024	none	0.042042	0.277931	0.0510511	0.18768	0.0204082	0.63564	0.0315399	0.464021
I19068_16_seq2	I19067_14_seq2	I19064_11_seq1	I19062_8_seq2	847	819	807	980	none	-0.00682594	0.868756	0.0477816	0.247407	0	1	0.0632411	0.15486
I19068_16_seq2	I19067_14_seq2	I19064_11_seq2	I19060_6_seq1	829	768	792	979	none	0.0312036	0.418233	0.129272	0.000797666	-0.0481283	0.254311	0.0695187	0.0996441
I19068_16_seq2	I19067_14_seq2	I19064_11_seq2	I19060_6_seq2	826	786	781	915	none	-0.0204778	0.620095	0.102389	0.0131908	-0.0777778	0.0707011	0.0555556	0.196706
I19068_16_seq2	I19067_14_seq2	I19064_11_seq2	I19061_7_seq1	817	779	779	1113	none	0.0430622	0.280911	0.103668	0.00943573	-0.045045	0.288603	0.0234234	0.581072
I19068_16_seq2	I19067_14_seq2	I19064_11_seq2	I19061_7_seq2	825	774	789	1050	none	0.0416667	0.280087	0.14881	0.000114513	-0.0181159	0.670379	0.112319	0.00831767
I19068_16_seq2	I19067_14_seq2	I19064_11_seq2	I19062_8_seq1	819	778	778	1040	none	0.0470219	0.234947	0.112853	0.00436495	-0.026178	0.530899	0.0471204	0.259345
I19068_16_seq2	I19067_14_seq2	I19064_11_seq2	I19062_8_seq2	828	780	776	975	none	-0.00473934	0.905086	0.0963665	0.0153281	-0.0192644	0.645275	0.0928196	0.0265561
I19068_16_seq2	I19068_16_seq1	I19057_3_seq1	I19057_3_seq2	BAAAA	ABAAA	AABAA	AAABA	introgression	DFO_stat	DFO_Pvalue	DIL_stat	DIL_Pvalue	DFI_stat	DFI_Pvalue	DOL_stat	DOL_Pvalue
I19068_16_seq2	I19068_16_seq1	I19058_4_seq1	I19059_5_seq1	826	831	636	602	none	0.121495	0.208841	0.0280374	0.7718	0.242718	0.0137656	0.145631	0.139409
I19068_16_seq2	I19068_16_seq1	I19058_4_seq1	I19059_5_seq2	820	835	705	647	none	0.0188679	0.845975	0.0377358	0.697635	0.176471	0.0747059	0.196078	0.0476704
I19068_16_seq2	I19068_16_seq1	I19058_4_seq2	I19058_4_seq1	851	885	591	642	none	0.0927835	0.360816	-0.0309278	0.760668	0.179487	0.0522036	0.0769231	0.405381
I19068_16_seq2	I19068_16_seq1	I19058_4_seq2	I19059_5_seq1	823	829	680	679	none	0.142857	0.143235	0.0857143	0.379775	0.192661	0.0442795	0.137615	0.150792
I19068_16_seq2	I19068_16_seq1	I19058_4_seq2	I19059_5_seq2	820	831	652	636	none	0.0434783	0.676657	0.108696	0.297147	0.180952	0.0637091	0.238095	0.0146974
I19068_16_seq2	I19068_16_seq1	I19059_5_seq1	I19059_5_seq2	837	861	580	540	none	-0.102564	0.36503	0.025641	0.820847	0.111111	0.268925	0.212121	0.0348085
I19068_16_seq2	I19068_16_seq1	I19064_11_seq1	I19060_6_seq1	653	702	802	966	none	0.0341463	0.397106	0.0829268	0.0397326	-0.0230415	0.631216	0.0460829	0.33704
I19068_16_seq2	I19068_16_seq1	I19064_11_seq1	I19060_6_seq2	635	702	841	991	none	-0.0774194	0.0538892	0.103226	0.010161	-0.0446429	0.344704	0.205357	1.38269e-05
I19068_16_seq2	I19068_16_seq1	I19064_11_seq1	I19061_7_seq1	625	684	820	1145	none	0.0126984	0.749933	0.12381	0.00188617	-0.036036	0.447657	0.121622	0.0103854
I19068_16_seq2	I19068_16_seq1	I19064_11_seq1	I19061_7_seq2	637	694	845	1090	none	0.0138675	0.723878	0.171032	1.31778e-05	-0.026506	0.589219	0.219277	7.93188e-06
I19068_16_seq2	I19068_16_seq1	I19064_11_seq1	I19062_8_seq1	642	689	824	1078	none	0.0108192	0.783164	0.109737	0.00524971	-0.0133333	0.777297	0.128889	0.00625423
I19068_16_seq2	I19068_16_seq1	I19064_11_seq1	I19062_8_seq2	651	700	834	1023	none	-0.0171821	0.678498	0.0652921	0.115222	-0.00930233	0.84704	0.102326	0.0338488
I19068_16_seq2	I19068_16_seq1	I19064_11_seq1	I19064_11_seq2	671	708	677	691	none	-0.121569	0.00604361	0.0666667	0.132184	-0.00639659	0.889824	0.198294	1.75213e-05
I19068_16_seq2	I19068_16_seq1	I19064_11_seq2	I19060_6_seq1	646	705	860	1003	none	0.125596	0.00163306	0.036566	0.359106	0.140271	0.00318763	0.0135747	0.775345
I19068_16_seq2	I19068_16_seq1	I19064_11_seq2	I19060_6_seq2	637	724	814	948	none	0.0174216	0.676392	0.0662021	0.112719	0.100703	0.0374416	0.166276	0.000590522
I19068_16_seq2	I19068_16_seq1	I19064_11_seq2	I19061_7_seq1	625	686	820	1138	none	0.0974026	0.0156289	0.0941558	0.0194451	0.116592	0.013806	0.112108	0.0179054
I19068_16_seq2	I19068_16_seq1	I19064_11_seq2	I19061_7_seq2	628	704	852	1092	none	0.0906149	0.0242812	0.148867	0.000214935	0.0861244	0.0782693	0.172249	0.000428894
I19068_16_seq2	I19068_16_seq1	I19064_11_seq2	I19062_8_seq1	640	704	831	1073	none	0.108943	0.00689858	0.0666667	0.098274	0.153846	0.00121886	0.0950226	0.0457453
I19068_16_seq2	I19068_16_seq1	I19064_11_seq2	I19062_8_seq2	640	722	854	1024	none	0.0848057	0.0436339	0.0106007	0.800887	0.125296	0.00996769	0.0260047	0.592762
I19068_16_seq2	I19068_16_seq1	I19065_12_seq1	I19065_12_seq2	649	708	744	758	none	-0.16	0.000175197	0.152727	0.000341272	-0.0959488	0.0377179	0.270789	4.5099e-09
I19068_16_seq2	I19068_16_seq1	I19066_13_seq1	I19065_12_seq1	606	666	690	831	none	0.099187	0.0139031	-0.0569106	0.158146	0.120482	0.00717385	-0.0722892	0.106701
I19068_16_seq2	I19068_16_seq1	I19066_13_seq1	I19065_12_seq2	587	686	688	855	none	-0.0465116	0.253789	0.0797342	0.0504258	0.0343434	0.444812	0.187879	2.91459e-05
I19068_16_seq2	I19068_16_seq1	I19066_13_seq2	I19065_12_seq1	622	675	803	832	none	0.177258	1.45984e-05	-0.0702341	0.0858864	0.226496	9.5909e-07	-0.0897436	0.0522036
I19068_16_seq2	I19068_16_seq1	I19066_13_seq2	I19065_12_seq2	590	716	767	820	none	0.0398551	0.349076	0.076087	0.0738343	0.0936819	0.0447424	0.137255	0.0032759
I19068_16_seq2	I19068_16_seq1	I19067_14_seq1	I19067_14_seq2	631	712	652	672	none	-0.0761062	0.0704473	0.111504	0.00803894	-0.0633397	0.148246	0.140115	0.00138294
