# Supplementary material for: Gene Flow and Diversification in Himalopsyche Martynovi Species Complex (Trichoptera: Rhyacophilidae) In the Hengduan Mountains
Source: Preprints.org preprint supplement (doi:10.20944/preprints202107.0468.v1), 2021-07-20
Supplement: Supplementary file 4 [file Supplementary File 3.xlsx]

## Sheet: Sheet1
Individual	SampleID	Family	Genus	Epithet	Notes	nRawReads	nLoci125	nLoci250	nLoci500	nLoci1000	AvgLocLenAll	%OnTarget	AvgNHomologs	DupRate
I19057	3	Rhyacophilidae	Himalopsyche	sp.n.		5574924	729	707	545	42	590.073	27.3372	0.779575	0.499642
I19058	4	Rhyacophilidae	Himalopsyche	alticola		12189836	775	745	636	137	742.715	22.0406	0.830131	0.50355
I19059	5	Rhyacophilidae	Himalopsyche	alticola		16923490	811	771	678	141	790.844	22.4657	0.878665	0.525784
I19060	6	Rhyacophilidae	Himalopsyche	epikur		4621664	751	725	610	76	657.3	37.122	0.807887	0.601673
I19061	7	Rhyacophilidae	Himalopsyche	epikur		12141816	779	754	662	120	741.634	25.1941	0.866532	0.543377
I19062	8	Rhyacophilidae	Himalopsyche	cf sp.n.		13120170	791	761	668	157	776.028	20.3283	0.858443	0.482353
I19063	9	Rhyacophilidae	Himalopsyche	cf sp.n.	Removed	824	0		0	0	0		0	0.490876
I19064	11	Rhyacophilidae	Himalopsyche	martynovi		16350298	772	737	562	89	662.867	20.6288	0.852376	0.576624
I19065	12	Rhyacophilidae	Himalopsyche	martynovi		13967072	780	749	632	88	705.259	17.8227	0.840243	0.488873
I19066	13	Rhyacophilidae	Himalopsyche	epikur		6767118	746	715	559	52	608.974	20.0784	0.823054	0.448102
I19067	14	Rhyacophilidae	Himalopsyche	alticola		5670876	749	724	567	52	614.77	31.6846	0.81092	0.564375
I19068	16	Rhyacophilidae	Himalopsyche	martynovi		13427234	736	692	545	106	662.242	25.7852	0.814965	0.576698
